# Supplementary material for: Metabolomic Profiling Reveals the Distinct Nutritional Properties of Breed and Feed on the Muscles in Chinese Taihe Black-bone Silky Fowl (<em>Gallus gallus domesticus Brisson</em>)
Source: Preprints.org preprint supplement (doi:10.20944/preprints202204.0137.v1), 2022-04-15
Supplement: Supplementary file 1 [file supplementary]

## Sheet: pos
Table S1. The metabolites were identified in chicken samples from UHPLC-Q-TOF-MS/MS data in positive ion mode.
ID	m/z	rt(s)	Name	adduct	HMDB	KEGG	SuperClass	Class	SubClass	TBsf-ncf-rep1	TBsf-ncf-rep2	TBsf-ncf-rep3	TBsf-ncf-rep4	TBsf-bpf-rep1	TBsf-bpf-rep2	TBsf-bpf-rep3	TBsf-bpf-rep4	BF-gsc-rep1	BF-gsc-rep2	BF-gsc-rep3	BF-gsc-rep4	QC-2	QC-3	QC-1
M211T292	211.119	291.884	10-hydroxydecanoate	[M+Na]+		C02774	Organic acids and derivatives	Hydroxy acids and derivatives	Medium-chain hydroxy acids and derivatives	5.91894e+06	1.16678e+07	4.91643e+06	5.393e+06	9.29194e+06	3.39645e+06	1.75456e+07	9.53131e+06	7.30801e+06	3.27739e+06	4.45002e+06	3.85525e+06	4.00382e+06	4.5917e+06	4.58946e+06
M480T275_3	480.345	274.963	1-(1z-hexadecenyl)-sn-glycero-3-phosphocholine	[M+H]+	HMDB0010407		Lipids and lipid-like molecules	Glycerophospholipids	Glycerophosphocholines	7.46939e+08	7.36022e+08	4.1443e+08	4.01468e+08	2.49177e+08	7.57275e+07	8.10073e+08	5.99811e+08	4.47778e+08	3.90532e+08	2.33382e+08	9.26122e+08	5.30621e+08	5.24829e+08	5.30598e+08
M819T243	818.606	242.96	1-(1z-octadecenyl)-2-(4z,7z,10z,13z,16z,19z-docosahexaenoyl)-sn-glycero-3-phosphocholine	[M+H]+	HMDB0011262		Lipids and lipid-like molecules	Glycerophospholipids	Glycerophosphocholines	3.04567e+08	2.89491e+08	2.06389e+08	3.01356e+08	1.26781e+08	1.28677e+08	2.18622e+08	8.09985e+07	1.51381e+08	1.33629e+08	1.57714e+08	2.26702e+08	1.91403e+08	1.89753e+08	2.02342e+08
M795T266	794.605	265.814	1-(1z-octadecenyl)-2-(5z,8z,11z,14z-eicosatetraenoyl)-sn-glycero-3-phosphocholine	[M+H]+	HMDB0011253		Lipids and lipid-like molecules	Glycerophospholipids	Glycerophosphocholines	2.53046e+07	2.105e+08	1.79319e+08	3.5879e+07	1.06152e+08	7.67419e+07	2.38864e+08	2.02733e+07	8.3911e+07	6.4148e+07	8.42742e+07	1.09406e+08	4.50229e+07	8.62473e+07	8.65018e+07
M508T273	508.377	272.938	1-(1z-octadecenyl)-sn-glycero-3-phosphocholine	[M+H]+	HMDB0013122		Lipids and lipid-like molecules	Glycerophospholipids	Glycerophosphocholines	9.60105e+07	9.7015e+07	7.04563e+07	6.42799e+07	2.46457e+07	1.02894e+07	1.00041e+08	5.46805e+07	2.43534e+07	2.80131e+07	1.32762e+07	9.06756e+07	5.65531e+07	5.6089e+07	5.6672e+07
M95T282	95.0609	281.615	1,2,3,6-tetrahydrobenzylalcohol	[M+H-H2O]+			Organic oxygen compounds	Organooxygen compounds	Alcohols and polyols	1.46844e+07	8.25848e+06	1.2835e+07	8.34898e+06	7.72395e+06	7.02875e+06	2.33178e+07	3.28066e+07	3.59893e+06	5.64809e+06	5.83528e+06	3.24092e+06	1.03613e+07	1.08322e+07	1.03613e+07
M109T395	109.029	394.922	1,2,3-benzenetriol	[M+H-H2O]+	HMDB0013674	C01108	Benzenoids	Phenols	Benzenetriols and derivatives	1.0739e+06	7.41475e+06	4.78321e+07	9.87715e+06	5.79563e+07	2.45337e+07	3.27136e+07	3.38937e+07	4.43002e+07	3.27234e+07	9.72596e+07	6.91087e+06	2.45017e+07	2.39848e+07	2.45222e+07
M113T147	113.071	146.603	1,2-cyclohexanedione	[M+H]+	HMDB0031344	C10823	Organic oxygen compounds	Organooxygen compounds	Carbonyl compounds	5.63358e+06	8.33116e+06	6.59334e+06	9.96255e+06	1.04021e+07	1.5e+07	9.98877e+06	1.04789e+07	8.67555e+06	1.15759e+07	1.10344e+07	5.67525e+06	9.40803e+06	1.06279e+07	9.41469e+06
M72T355	72.0815	354.704	1,2-diamino-2-methylpropane	[M+H-NH3]+			Organic nitrogen compounds	Organonitrogen compounds	Amines	3.73074e+07	3.78701e+07	5.29277e+07	3.15085e+07	2.96784e+07	2.01679e+07	5.16125e+07	6.77021e+07	3.23819e+07	2.83749e+07	2.55386e+07	2.52704e+07	3.99286e+07	4.04536e+07	3.99292e+07
M635T59	634.541	58.7244	1,2-dilinoleoylglycerol	[M+NH4]+			Lipids and lipid-like molecules	Fatty Acyls	Lineolic acids and derivatives	9.73015e+06	1.55562e+07	1.5775e+07	1.0315e+07	6.8842e+06	1.44587e+07	7.84803e+06	1.02597e+07	5.25842e+06	7.20219e+06	7.07954e+06	9.19549e+06	8.92693e+06	9.10427e+06	8.92813e+06
M97T2_2	97.0766	2.04727	1,2-dimethylimidazole	[M+H]+			Organoheterocyclic compounds	Azoles	Imidazoles	1.87972e+07	2.48524e+07	2.16053e+07	2.02679e+07	2.793e+07	2.13402e+07	1.99105e+07	1.90755e+07	1.78968e+07	2.82109e+07	2.56603e+07	1.67296e+07	1.49898e+07	1.40773e+07	1.49694e+07
M809T248	808.585	247.922	1,2-dioleoyl-sn-glycero-3-phosphatidylcholine	[M+Na]+	HMDB0062690		Lipids and lipid-like molecules	Glycerophospholipids	Glycerophosphocholines	1.67088e+08	1.50125e+08	1.86107e+08	1.85207e+08	3.64477e+08	3.32404e+08	2.23014e+08	4.62763e+08	3.66452e+08	2.71814e+08	4.01269e+08	3.37699e+08	2.47067e+08	2.54956e+08	2.54796e+08
M731T257	730.539	257.495	1,2-dipalmitoleoyl-sn-glycero-3-phosphocholine	[M+H]+	HMDB0008002		Lipids and lipid-like molecules	Glycerophospholipids	Glycerophosphocholines	1.27368e+07	9.1106e+06	1.83432e+07	1.71715e+07	1.15449e+07	2.97834e+07	1.54968e+07	1.03387e+07	1.36273e+07	2.34458e+07	2.00208e+07	1.1022e+07	1.78753e+07	1.78968e+07	1.9435e+07
M707T259	706.538	258.932	1,2-dipentadecanoyl-sn-glycero-3-phosphocholine	[M+H]+	HMDB0007934		Lipids and lipid-like molecules	Glycerophospholipids	Glycerophosphocholines	8.8115e+06	6.0498e+06	7.41886e+06	9.76412e+06	1.06052e+07	5.65972e+06	1.07962e+07	1.71264e+07	5.8827e+06	4.0692e+06	2.03386e+07	7.02988e+06	9.59389e+06	9.58717e+06	1.00218e+07
M112T231	112.087	230.653	1,3,4,6,7,8-hexahydro-2h-pyrimido[1,2-a]pyrimidine	[M+H-C2H4]+			Organoheterocyclic compounds	Diazines	Pyrimidines and pyrimidine derivatives	5.19357e+06	5.88971e+06	5.80887e+06	1.06131e+06	2.62416e+06	5.77211e+06	6.22159e+06	5.35647e+06	5.97214e+06	5.45299e+06	5.8791e+06	5.36489e+06	5.693e+06	7.02182e+06	5.62609e+06
M127T403	127.039	402.521	1,3,5-benzenetriol	[M+H]+	HMDB0013675	C02183	Benzenoids	Phenols	Benzenetriols and derivatives	295458	3.38607e+06	2.77077e+07	7.99781e+06	6.18842e+07	2.5075e+07	2.69509e+07	2.95151e+07	3.06975e+07	1.74581e+07	8.52467e+07	6.39687e+06	1.91469e+07	1.86944e+07	1.81986e+07
M165T145	165.114	145.446	1,3-benzenediol, 5-methyl-4-[(1r,6r)-3-methyl-6-(1-methylethenyl)-2-cyclohexen-1-yl]-	[M+H-C7H10]+			Lipids and lipid-like molecules	Prenol lipids	Monoterpenoids	4.30485e+06	6.84798e+06	9.23228e+06	1.42569e+07	1.15299e+07	5.15112e+06	5.092e+06	4.38609e+06	8.61787e+06	6.88131e+06	7.8373e+06	4.91957e+06	8.27476e+06	8.09599e+06	8.08989e+06
M113T261	113.071	260.516	1,3 cyclohexanedione	[M+H]+		C08235	Organic oxygen compounds	Organooxygen compounds	Carbonyl compounds	3.04057e+07	1.19949e+08	3.54736e+07	4.12517e+07	3.94357e+07	3.72136e+07	4.23357e+07	3.91617e+07	3.00621e+07	2.58545e+07	5.18383e+07	2.10785e+07	3.68426e+07	3.69939e+07	2.98462e+07
M193T300_2	193.109	300.357	1-(4-isopropylphenyl)-3-methylurea	[M+H]+			Benzenoids	Benzene and substituted derivatives	N-phenylureas	2.5234e+08	2.40681e+08	2.08639e+08	2.28563e+08	2.39896e+08	2.13453e+08	3.35617e+08	3.09997e+08	1.73342e+08	1.6907e+08	1.73309e+08	2.38979e+08	2.33358e+08	2.36891e+08	2.36831e+08
M284T275	284.331	274.953	15-deoxy-goyazensolide	[M+K]+			Organoheterocyclic compounds	Lactones	Gamma butyrolactones	2.58692e+07	2.72867e+07	2.62076e+07	2.61575e+07	2.74958e+07	2.57183e+07	2.50022e+07	2.7162e+07	2.66097e+07	2.69818e+07	2.77528e+07	2.25276e+07	4.16032e+07	4.12787e+07	4.16016e+07
M159T326	159.091	326.359	1,5-diaminonaphthalene	[M+H]+		C19463				9.36181e+06	9.46994e+06	1.02421e+07	7.96567e+06	1.11198e+07	6.83253e+06	9.10022e+06	1.22952e+07	5.56082e+06	5.45836e+06	7.64554e+06	4.08412e+06	8.16877e+06	8.3161e+06	8.1685e+06
M81T55	81.0454	55.0024	1,5-hexadien-3-ol	[M+H-H2O]+			Organic oxygen compounds	Organooxygen compounds	Alcohols and polyols	1.09306e+07	7.67349e+06	6.29145e+06	1.09529e+07	7.86188e+06	1.33713e+07	9.41172e+06	1.58044e+07	1.32533e+07	1.08851e+07	1.71855e+07	1.06203e+07	7.79358e+06	8.5545e+06	6.50705e+06
M145T356	145.05	355.897	1,6-anhydro-.beta.-d-glucose	[M+H-H2O]+	HMDB0000640					9.07991e+06	7.7269e+06	7.20576e+06	7.97691e+06	1.17713e+07	9.4389e+06	1.37596e+07	1.07937e+07	7.25346e+06	7.28113e+06	8.64516e+06	4.99818e+06	9.52448e+06	9.4623e+06	9.46198e+06
M245T64	245.226	63.7677	17-octadecynoic acid	[M+H-2H2O]+			Lipids and lipid-like molecules	Fatty Acyls	Fatty acids and conjugates	2.32986e+07	2.40143e+07	7.18363e+06	2.73771e+07	3.41711e+07	8.29291e+06	2.60564e+07	2.98407e+07	2.31194e+07	1.8897e+07	2.58494e+07	2.51258e+07	2.22095e+07	2.18932e+07	2.18936e+07
M129T340_2	129.102	339.569	1,8-octanediol	[M+H-H2O]+		C14218	Lipids and lipid-like molecules	Fatty Acyls	Fatty alcohols	9.95588e+07	1.05456e+08	1.06012e+08	1.08492e+08	1.11195e+08	1.16217e+08	9.40199e+07	1.1041e+08	1.07495e+08	1.03394e+08	1.21563e+08	9.38921e+07	1.18681e+08	1.42072e+08	1.17787e+08
M111T234	111.056	234.331	1-acetylimidazole	[M+H]+		C02560	Organoheterocyclic compounds	Azoles	Imidazoles	7.29571e+07	5.95614e+07	6.3638e+07	6.62664e+07	5.48681e+07	7.20622e+07	9.39371e+07	8.21611e+07	5.42656e+07	4.77131e+07	5.46585e+07	3.69808e+07	4.43092e+07	4.39474e+07	4.73628e+07
M130T110	130.061	109.555	1-amino-1-cyclopentanecarboxylate	[M+H]+	HMDB0062225	C03969	Organic acids and derivatives	Carboxylic acids and derivatives	Amino acids, peptides, and analogues	1.93669e+07	2.02685e+07	4.84106e+06	6.2933e+06	1.91819e+07	5.65544e+06	5.40039e+06	4.57318e+06	4.38322e+06	5.08666e+06	4.98845e+06	4.38478e+06	4.35919e+06	4.79731e+06	4.36163e+06
M84T384	84.045	383.51	1-Aminocyclopropanecarboxylic acid	(M+H-H2O)+	HMDB0036458	C01234	Organic acids and derivatives	Carboxylic acids and derivatives	Amino acids, peptides, and analogues	2.72772e+07	2.57487e+07	2.93993e+07	1.72214e+07	2.68894e+07	1.89648e+07	6.37287e+07	5.45763e+07	1.12312e+07	1.67183e+07	8.03675e+06	1.25867e+07	2.47763e+07	2.40545e+07	2.40083e+07
M236T366	236.149	365.979	1-(benzo[d][1,3]dioxol-4-yl)-2-(methylamino)pentan-1-one	[M+H]+			Benzenoids	Benzene and substituted derivatives	Butyrophenones	276272	479427	387367	1.27495e+06	2.33615e+06	1.05374e+06	4.75483e+06	729061	1.28519e+06	1.17794e+06	1.7526e+06	833518	1.39111e+06	1.44365e+06	1.44374e+06
M125T924	125.108	924.077	1-butylimidazole	[M+H]+			Organoheterocyclic compounds	Azoles	Imidazoles	3.5377e+07	4.96546e+07	2.40014e+07	1.55567e+07	1.80529e+07	4.83399e+07	4.73261e+07	2.57386e+07	5.04243e+07	4.88807e+07	5.02047e+07	4.75525e+07	4.86002e+07	4.79526e+07	4.79571e+07
M115T999	115.123	998.534	1-ethylpiperazine	[M+H]+			Organoheterocyclic compounds	Diazinanes	Piperazines	1.858e+07	2.29424e+07	1.70708e+07	1.72402e+07	1.79438e+07	1.70849e+07	1.87187e+07	1.67394e+07	1.57426e+07	1.92193e+07	1.83529e+07	2.21044e+07	1.65845e+07	1.62344e+07	1.65804e+07
M85T356	85.029	355.891	1h-1,2,4-triazol-3-amine	[M+H]+		C11261	Organoheterocyclic compounds	Azoles	Triazoles	3.96877e+07	3.43225e+07	3.40689e+07	3.32927e+07	5.30898e+07	4.16423e+07	6.30597e+07	4.88062e+07	3.27752e+07	3.35673e+07	3.91018e+07	2.15253e+07	4.14224e+07	4.13641e+07	4.13641e+07
M771T248	770.604	247.735	1-hexadecyl-2-(8z,11z,14z-eicosatrienoyl)-sn-glycero-3-phosphocholine	[M+H]+			Lipids and lipid-like molecules	Glycerophospholipids	Glycerophosphocholines	3.11176e+08	3.44135e+08	2.68347e+08	4.9804e+08	2.10818e+08	1.44685e+08	3.64957e+08	1.84604e+08	2.42879e+08	1.45047e+08	1.70991e+08	1.59256e+08	1.96777e+08	2.01629e+08	2.02508e+08
M482T280_3	482.36	280.006	1-hexadecyl-sn-glycero-3-phosphocholine	[M+H]+			Lipids and lipid-like molecules	Glycerophospholipids	Glycerophosphocholines	1.34654e+08	1.54746e+08	8.70177e+07	1.00754e+08	2.91544e+07	6.03518e+06	2.44312e+08	1.3046e+08	4.43532e+07	4.75026e+07	1.975e+07	1.00901e+08	8.42372e+07	9.34967e+07	9.35122e+07
M172T916	172.072	916.167	1H-Indole-3-propanoic acid	(M+H-H2O)+						3.30532e+06	3.33013e+06	3.1906e+06	3.27053e+06	3.87273e+06	3.36188e+06	3.03244e+06	2.97623e+06	3.7131e+06	3.10924e+06	389432	166536	3.51785e+06	3.51862e+06	3.41185e+06
M602T59	601.519	58.7146	1-linoleoyl-2-oleoyl-rac-glycerol	[M+H-H2O]+			Lipids and lipid-like molecules	Fatty Acyls	Lineolic acids and derivatives	2.12331e+06	3.52159e+06	3.21463e+06	2.56974e+06	2.96708e+06	2.35184e+06	2.59518e+06	2.5081e+06	1.3292e+06	2.56895e+06	2.95425e+06	3.96305e+06	2.09936e+06	2.15924e+06	2.10118e+06
M223T429	223.119	429.412	1-methyl-3-isobutylxanthine	[M+H]+		C13708	Organoheterocyclic compounds	Imidazopyrimidines	Purines and purine derivatives	6.05839e+06	1.27561e+07	6.83977e+06	1.47243e+07	2.44483e+07	6.94631e+06	1.52237e+07	1.39297e+07	6.6315e+06	7.73229e+06	1.46285e+07	5.74304e+06	8.78619e+06	8.78842e+06	7.59544e+06
M126T399	126.103	399.231	1-methylhistamine	[M+H]+	HMDB0000898	C05127	Organic nitrogen compounds	Organonitrogen compounds	Amines	2.7781e+07	3.10169e+07	2.78814e+07	2.59019e+07	3.37996e+07	2.79017e+07	3.5616e+07	3.32287e+07	2.4143e+07	2.31814e+07	3.29312e+07	2.24335e+07	2.81991e+07	2.79936e+07	2.79914e+07
M115T377	115.05	376.906	1-methylhydantoin	[M+H]+	HMDB0003646	C02565	Organoheterocyclic compounds	Azolines	Imidazolines	4.29199e+06	3.35038e+06	4.11234e+06	4.27029e+06	3.97765e+06	4.11169e+06	3.69709e+06	4.06801e+06	3.77058e+06	3.48408e+06	4.72086e+06	3.47186e+06	3.95812e+06	4.00536e+06	3.9582e+06
M124T2_2	124.087	2.05542	1-methyl-l-histidine	[M+H-CH2O2]+	HMDB0000001	C01152	Organic acids and derivatives	Carboxylic acids and derivatives	Amino acids, peptides, and analogues	3.99587e+07	1.53294e+08	8.33647e+07	6.74675e+07	1.59045e+08	5.68126e+07	7.58454e+07	7.87001e+07	1.13854e+08	1.15554e+08	1.24392e+08	1.23636e+08	7.9556e+07	8.52124e+07	8.59426e+07
M468T281	468.309	281.036	1-myristoyl-sn-glycero-3-phosphocholine	[M+H]+	HMDB0010379		Lipids and lipid-like molecules	Glycerophospholipids	Glycerophosphocholines	3.75163e+06	3.39016e+06	2.37946e+06	2.08062e+06	1.09889e+06	544675	3.36766e+06	4.7553e+06	2.13685e+06	2.41305e+06	1.5495e+06	4.23394e+06	2.72445e+06	2.72504e+06	2.75579e+06
M155T373	155.082	373.204	1-naphthalenamine	[M+H-NH3+N2]+		C14790				1.09702e+06	1.81877e+06	753598	1.22882e+06	2.55304e+06	1.6642e+06	5.71297e+06	1.28747e+06	508195	667424	1.25791e+06	512306	1.1762e+06	1.24846e+06	1.24904e+06
M793T245	792.591	245.136	1-o-hexadecyl-2-o-(4z,7z,10z,13z,16z,19z-docosahexaenoyl)-sn-glyceryl-3-phosphorylcholine	[M+H]+	HMDB0013409		Lipids and lipid-like molecules	Glycerophospholipids	Glycerophosphocholines	2.07777e+09	1.50725e+09	1.30485e+09	1.51075e+09	1.32397e+09	1.58503e+09	2.21483e+09	8.9666e+08	2.12443e+09	1.22008e+09	1.24312e+09	1.81643e+09	1.42241e+09	1.42247e+09	1.44386e+09
M767T245	766.576	244.97	1-o-hexadecyl-2-o-(5z,8z,11z,14z,17z-eicosapentaenoyl)-sn-glyceryl-3-phosphorylcholine	[M+H]+			Lipids and lipid-like molecules	Glycerophospholipids	Glycerophosphocholines	5.04303e+09	3.1573e+09	3.80171e+09	4.49469e+09	7.7169e+09	4.94502e+09	7.01943e+09	6.98097e+09	6.07971e+09	5.20743e+09	5.09974e+09	6.56152e+09	5.18551e+09	5.3167e+09	5.179e+09
M184T420_2	184.074	420.128	1-o-hexadecyl-2-o-acetyl-sn-glyceryl-3-phosphorylcholine	[M+H-C21H40O3]+	HMDB0062195		Lipids and lipid-like molecules	Glycerophospholipids	Glycerophosphocholines	1.70134e+08	1.66932e+08	9.77385e+07	2.04066e+08	9.92189e+07	7.13268e+07	6.36989e+08	3.87081e+08	1.08877e+08	1.25629e+08	2.35441e+08	8.15199e+07	1.82837e+08	1.78283e+08	1.77845e+08
M733T258	732.554	257.54	1-oleoyl-2-myristoyl-sn-glycero-3-phosphocholine	[M+H]+	HMDB0008097		Lipids and lipid-like molecules	Glycerophospholipids	Glycerophosphocholines	3.84683e+07	5.15264e+07	3.1051e+07	1.15636e+08	6.90317e+07	5.79287e+07	4.697e+07	4.59023e+07	6.5043e+07	1.41405e+08	1.95904e+08	1.28017e+08	9.36778e+07	8.92388e+07	9.44293e+07
M339T91	339.289	91.0385	1-oleoyl-2-palmitoyl-rac-glycerol	[M+H-C16H32O2]+			Lipids and lipid-like molecules	Glycerolipids	Diradylglycerols	1.86471e+06	2.24085e+06	2.04636e+06	1.80744e+06	2.53681e+06	1.45879e+06	1.02103e+07	7.37738e+06	3.33324e+06	2.65709e+06	2.14926e+06	2.39882e+06	4.00921e+06	3.49428e+06	3.51052e+06
M544T274	544.34	273.525	1-Oleoyl-sn-glycero-3-phosphocholine	(M+Na)+						7.31967e+07	6.7106e+07	4.09488e+07	2.75186e+07	4.06635e+07	3.09669e+07	6.71338e+07	1.50081e+08	8.07564e+07	9.31909e+07	5.90087e+07	1.76382e+08	7.67789e+07	7.61228e+07	7.67768e+07
M510T278_2	510.392	278.061	1-o-octadecyl-sn-glyceryl-3-phosphorylcholine	[M+H]+	HMDB0011149		Lipids and lipid-like molecules	Glycerophospholipids	Glycerophosphocholines	1.5177e+07	1.44513e+07	9.51775e+06	1.10483e+07	5.32283e+06	2.20052e+06	3.15178e+07	2.68235e+07	3.7249e+06	3.41662e+06	3.09517e+06	9.0424e+06	1.06057e+07	1.16778e+07	1.16737e+07
M807T247	806.569	247.054	1-palmitoyl-2-docosahexaenoyl-sn-glycero-3-phosphocholine	[M+H]+	HMDB0007991		Lipids and lipid-like molecules	Glycerophospholipids	Glycerophosphocholines	7.06226e+07	6.58485e+07	9.14251e+07	5.83036e+07	1.54159e+08	1.09831e+08	4.58264e+07	1.72266e+08	1.1775e+08	1.42737e+08	1.85904e+07	1.60011e+08	1.01496e+08	1.05659e+08	1.05542e+08
M454T282	454.293	281.626	1-palmitoyl-2-hydroxy-sn-glycero-3-phosphoethanolamine	[M+H]+	HMDB0011503		Lipids and lipid-like molecules	Glycerophospholipids	Glycerophosphoethanolamines	3.47094e+07	4.67262e+07	2.25401e+07	2.03994e+07	1.16467e+07	5.48798e+06	1.98635e+07	3.74593e+07	3.93076e+07	2.48653e+07	1.26298e+07	5.04426e+07	2.95255e+07	2.95208e+07	2.98222e+07
M337T59	337.274	58.821	1-palmitoyl-2-linoleoyl-rac-glycerol	[M+H-C16H32O2]+			Lipids and lipid-like molecules	Fatty Acyls	Lineolic acids and derivatives	1.17491e+07	1.52729e+07	1.72945e+07	1.06726e+07	1.32179e+07	1.31968e+07	1.21474e+07	5.97898e+06	5.01388e+06	7.70558e+06	8.0794e+06	9.56954e+06	1.1151e+07	1.03491e+07	1.1147e+07
M759T256	758.57	255.589	1-palmitoyl-2-linoleoyl-sn-glycero-3-phosphocholine	[M+H]+	HMDB0007973		Lipids and lipid-like molecules	Glycerophospholipids	Glycerophosphocholines	1.79125e+09	1.50689e+09	2.16049e+09	1.95703e+09	1.91619e+09	4.66728e+09	1.491e+09	2.12895e+09	1.07819e+09	4.8403e+09	2.74932e+09	2.23145e+09	2.54734e+09	2.80495e+09	2.79213e+09
M578T219	577.52	219.497	1-palmitoyl-2-oleoyl-sn-glycerol	[M+H-H2O]+	HMDB0007102		Lipids and lipid-like molecules	Glycerolipids	Diradylglycerols	1.40596e+07	2.32651e+07	1.8035e+07	8.5428e+06	1.89016e+07	1.18108e+07	2.03618e+07	2.76807e+07	3.55689e+07	1.84418e+07	3.60465e+07	2.52395e+07	1.95233e+07	1.95214e+07	1.90332e+07
M496T279_2	496.34	279.037	1-palmitoyl-sn-glycero-3-phosphocholine	[M+H]+	HMDB0010382		Lipids and lipid-like molecules	Glycerophospholipids	Glycerophosphocholines	5.88952e+08	5.39129e+08	3.36836e+08	2.51376e+08	2.013e+08	1.06356e+08	4.14662e+08	6.59371e+08	3.63278e+08	4.60813e+08	2.56751e+08	9.11508e+08	4.56181e+08	4.56169e+08	4.62917e+08
M482T280_2	482.325	279.714	1-pentadecanoyl-sn-glycero-3-phosphocholine	[M+H]+	HMDB0010381		Lipids and lipid-like molecules	Glycerophospholipids	Glycerophosphocholines	2.88772e+08	3.26143e+08	1.63908e+08	1.22462e+08	7.36189e+07	2.05531e+07	1.62531e+08	1.82448e+08	2.03326e+08	1.9875e+08	6.50537e+07	2.74399e+08	1.91172e+08	1.91164e+08	1.9316e+08
M141T316	141.139	316.198	(1r,5s)-8-methyl-8-azabicyclo[3.2.1]octan-3-amine	[M+H]+						3.41722e+06	3.15048e+06	2.85282e+06	3.26622e+06	2.35534e+06	2.27426e+06	2.63969e+06	3.38633e+06	2.55424e+06	2.26667e+06	2.36025e+06	2.09505e+06	2.81868e+06	2.81867e+06	2.84025e+06
M362T201	362.327	201.314	(1s,2r-d-erythro-2-n-myristoylamino)-1-phenyl-1-propanol	[M+H]+			Benzenoids	Benzene and substituted derivatives	Phenylpropanes	8.29298e+06	5.33144e+06	1.67041e+07	4.14925e+06	3.23778e+06	9.52752e+06	3.52948e+06	3.76597e+06	6.3973e+06	3.99294e+06	4.13808e+06	7.28747e+06	4.76375e+07	4.43738e+07	4.76431e+07
M888T263	887.564	263.396	1-stearoyl-2-arachidonoyl-sn-glycero-3-phospho-(1'-myo-inositol)	[M+H]+	HMDB0009815		Lipids and lipid-like molecules	Glycerophospholipids	Glycerophosphoinositols	1.50766e+07	1.14726e+07	1.16743e+07	1.20182e+07	1.21746e+07	7.73748e+06	1.21172e+07	1.60998e+07	1.11175e+07	1.16246e+07	1.2094e+07	1.18148e+07	1.11912e+07	1.12022e+07	1.20143e+07
M663T59	662.572	58.7246	1-Stearoyl-2-arachidonoyl-sn-glycerol	(M+NH4)+	HMDB0007098/HMDB0007099/HMDB0007100/HMDB0007101/HMDB0007103/HMDB0007108/HMDB0007112/HMDB0007131/HMDB0007132/HMDB0007156/HMDB0007166/HMDB0007170/HMDB0007223/HMDB0007224/HMDB0007248/HMDB0007257/HMDB0007398	C00165	Lipids and lipid-like molecules	Glycerolipids/Fatty Acyls	Diradylglycerols/Lineolic acids and derivatives	7.77014e+06	5.21129e+06	7.24199e+06	5.34029e+06	7.62426e+06	1.21139e+07	1.33031e+07	2.15904e+07	3.44063e+06	7.29258e+06	5.30758e+06	3.68641e+06	7.86195e+06	8.48531e+06	7.88033e+06
M811T247	810.601	246.842	1-stearoyl-2-arachidonyl-sn-glycero-3-phosphocholine	[M+H]+			Lipids and lipid-like molecules	Glycerophospholipids	Glycerophosphocholines	5.96318e+08	3.66769e+08	3.85859e+08	2.53092e+08	6.01478e+08	6.32127e+08	4.73844e+08	1.07181e+09	3.70577e+08	4.52378e+08	7.41489e+08	5.43156e+08	4.81155e+08	5.34651e+08	4.83362e+08
M506T274	506.361	273.808	1-stearoyl-2-hydroxy-sn-glycero-3-phosphocholine	[M+H-H2O]+	HMDB0010384	C04230	Lipids and lipid-like molecules	Glycerophospholipids	Glycerophosphocholines	7.76441e+07	9.5696e+07	3.684e+07	4.53446e+07	2.11717e+07	7.71584e+06	7.43196e+07	3.70287e+07	4.11977e+07	2.45574e+07	1.74957e+07	9.35739e+07	5.26559e+07	5.17318e+07	5.26548e+07
M787T251	786.601	251.205	1-stearoyl-2-linoleoyl-sn-glycero-3-phosphocholine	[M+H]+	HMDB0008039		Lipids and lipid-like molecules	Glycerophospholipids	Glycerophosphocholines	5.08032e+08	1.23204e+08	2.41078e+08	4.65772e+08	2.76145e+08	2.89023e+08	3.65034e+08	5.31478e+08	3.31047e+08	6.05519e+08	5.01287e+08	1.22968e+08	2.90093e+08	3.64703e+08	3.143e+08
M604T265	603.535	265.378	1-stearoyl-2-linoleoyl-sn-glycerol	[M+H-H2O]+	HMDB0007161		Lipids and lipid-like molecules	Fatty Acyls	Lineolic acids and derivatives	1.0266e+07	7.71618e+06	1.03549e+07	1.48262e+07	1.01973e+07	8.20305e+06	8.01218e+06	5.73011e+06	5.27174e+06	6.19916e+06	5.16814e+06	6.30625e+06	8.01093e+06	8.04541e+06	8.0453e+06
M769T65	768.554	65.0609	1-stearoyl-2-oleoyl-sn-glycero-3-phosphoethanolamine	[M+Na]+	HMDB0008993		Lipids and lipid-like molecules	Glycerophospholipids	Glycerophosphoethanolamines	1.26611e+08	1.35417e+08	1.45131e+08	1.3739e+08	1.42076e+08	1.33734e+08	1.3645e+08	9.21695e+07	1.8806e+08	1.76288e+08	1.72431e+08	1.73206e+08	1.37373e+08	1.37375e+08	1.35082e+08
M833T245	832.586	245.028	1-Stearoyl-2-oleoyl-sn-glycerol 3-phosphocholine (SOPC)	(M-H+2Na)+	HMDB0000564/HMDB0007878/HMDB0007879/HMDB0007880/HMDB0007882/HMDB0007884/HMDB0007886/HMDB0007887/HMDB0007897/HMDB0007898/HMDB0007911/HMDB0007912/HMDB0007913/HMDB0007914/HMDB0007936/HMDB0007937/HMDB0007938/HMDB0007939/HMDB0007940/HMDB0007958/HMDB0007959/HMDB0007960/HMDB0007961/HMDB0007964/HMDB0007966/HMDB0007967/HMDB0007981/HMDB0007982/HMDB0007983/HMDB0007984/HMDB0007985/HMDB0008002/HMDB0008003/HMD…	C00157	Lipids and lipid-like molecules	Glycerophospholipids	Glycerophosphocholines	9.1917e+06	6.24163e+06	9.17693e+06	6.77298e+06	1.37527e+07	1.36437e+07	1.32068e+07	2.37032e+07	8.67242e+06	1.83141e+07	2.06026e+07	1.86679e+07	1.33969e+07	1.43497e+07	1.34068e+07
M341T280	341.305	279.635	1-stearoyl-rac-glycerol	[M+H-H2O]+			Lipids and lipid-like molecules	Glycerolipids	Monoradylglycerols	5.53743e+06	5.22435e+06	2.81319e+06	2.23545e+06	1.94537e+06	714145	3.2939e+06	4.8192e+06	3.26664e+06	3.46528e+06	1.82222e+06	4.72568e+06	3.28701e+06	3.28699e+06	3.3125e+06
M524T277_2	524.372	276.966	1-Stearoyl-sn-glycerol 3-phosphocholine(LPC(18:0))	[M+H]+	HMDB0010384	C04230	Lipids and lipid-like molecules	Glycerophospholipids	Glycerophosphocholines	1.26397e+08	8.70454e+07	6.77281e+07	5.43056e+07	5.62129e+07	2.41694e+07	1.54353e+08	2.15648e+08	5.1436e+07	7.47735e+07	4.68871e+07	1.35144e+08	9.34663e+07	9.17883e+07	9.34553e+07
M96T141	96.0687	141.102	2(1h)-pyridinone	[M+H]+	HMDB0013751	C02502	Organoheterocyclic compounds	Pyridines and derivatives	Hydropyridines	3.17915e+06	2.53822e+06	3.47607e+06	3.96052e+06	2.62043e+06	2.71858e+06	2.29845e+06	5.0323e+06	1.75083e+06	2.29943e+06	1.45585e+06	3.309e+06	3.4552e+06	4.13938e+06	3.14486e+06
M217T331	217.106	330.985	2-(2',3',4'-trihydroxybutyl)quinoxaline	[M+H-H2O]+			Organoheterocyclic compounds	Diazanaphthalenes	Benzodiazines	5.58832e+06	4.21803e+06	5.35025e+06	3.73244e+06	6.22795e+06	2.67596e+06	6.96976e+06	9.67219e+06	1.96761e+06	2.29895e+06	4.42709e+06	1.99413e+06	4.13978e+06	4.4486e+06	4.44119e+06
M210T907	210.134	906.952	2,2-bis[hydroxymethyl]-2,2',2''-nitrilotriethanol	[M+H]+			Organic nitrogen compounds	Organonitrogen compounds	Amines	1.93132e+07	7.13055e+07	3.49634e+07	4.64567e+07	4.38682e+07	1.9973e+07	1.55786e+07	2.27602e+07	2.36054e+07	2.70994e+07	2.33381e+07	1.45203e+07	1.79948e+07	1.96961e+07	1.9696e+07
M250T56	250.119	55.9616	2,4,6-triallyloxy-1,3,5-triazine	[M+H]+			Organoheterocyclic compounds	Triazines	1,3,5-triazines	151879	194921	93071.8	303922	119242	142574	94909.4	564566	168891	75543.9	97828.1	1.41994e+06	1.071e+07	1.07235e+07	1.2005e+07
M246T222	246.243	222.189	2,4,6-tri-tert-butylaniline	[M+H-CH4]+			Benzenoids	Benzene and substituted derivatives	Phenylpropanes	2.27459e+07	1.51139e+07	2.0378e+07	3.23837e+07	1.76281e+07	1.52451e+07	1.9812e+07	2.67597e+07	1.67877e+07	1.67352e+07	1.77145e+07	2.81503e+07	4.35727e+07	4.47479e+07	4.35914e+07
M153T399	153.066	399.185	2',4'-dihydroxyacetophenone	[M+H]+	HMDB0029659	C03663	Organic oxygen compounds	Organooxygen compounds	Carbonyl compounds	2.90875e+07	3.28693e+07	2.95858e+07	3.19494e+07	3.57177e+07	3.09278e+07	3.74408e+07	3.4616e+07	2.71316e+07	2.406e+07	3.41412e+07	2.45893e+07	3.06009e+07	3.06294e+07	3.00247e+07
M215T290	215.064	289.649	2,4-dihydroxybenzophenone	[M+H]+		C14215	Benzenoids	Benzene and substituted derivatives	Benzophenones	732573	1.07395e+06	1.27089e+06	1.37329e+06	1.56532e+06	1.12519e+06	244982	149501	80813.4	1.19206e+06	1.47085e+06	1.33405e+06	1.00704e+06	1.05719e+06	1.05684e+06
M367T59	367.336	59.2184	25-hydroxycholesterol	[M+H-2H2O]+		C15519	Lipids and lipid-like molecules	Steroids and steroid derivatives	Cholestane steroids	2.91849e+06	2.44781e+06	2.84747e+06	2.15717e+06	2.19736e+06	1.07257e+06	5.7541e+06	3.36619e+06	1.09395e+06	1.20061e+06	2.99197e+06	1.44438e+06	1.85718e+06	1.85694e+06	1.7916e+06
M105T64	105.07	64.1843	2',6'-dihydroxy 4'-methoxydihydrochalcone	[M+H-C8H8O4]+	HMDB0034435	C09644	Phenylpropanoids and polyketides	Linear 1,3-diarylpropanoids	Chalcones and dihydrochalcones	1.06467e+08	1.26204e+08	1.4877e+08	1.1981e+08	1.04911e+08	1.43019e+08	1.11112e+08	1.11769e+08	1.35468e+08	1.17091e+08	1.22133e+08	1.06375e+08	1.25848e+08	1.25841e+08	1.26988e+08
M155T184	155.082	184.065	2,6-dimethoxyphenol	[M+H]+	HMDB0034158	C10787	Benzenoids	Phenols	Methoxyphenols	1.34305e+07	898588	1.32716e+07	1.49627e+07	1.7199e+07	1.30714e+07	9.84535e+06	1.80979e+07	7.9999e+06	1.15624e+07	1.2816e+07	1.2681e+07	1.36154e+07	1.40365e+07	1.36131e+07
M390T369	390.137	369.265	2-acetamido-2-deoxy-3-o-(.alpha.-l-fucopyranosyl)-d-glucopyranose	[M+Na]+			Organic oxygen compounds	Organooxygen compounds	Carbohydrates and carbohydrate conjugates	934192	618899	1.032e+06	920344	2.80324e+06	2.6165e+06	7.65372e+06	5.70087e+06	634927	701115	1.97165e+06	449012	2.12539e+06	2.17299e+06	2.17305e+06
M120T368	120.081	368.233	2-Amino-1-phenylethanol	(M+H-H2O)+						2.26214e+07	1.08637e+07	3.08993e+07	2.45744e+07	2.43566e+07	1.82212e+07	1.35196e+07	1.33934e+07	2.38535e+06	2.30691e+07	9.73478e+06	1.87778e+07	1.65634e+07	1.83527e+07	1.83152e+07
M88T983	88.0763	983.29	2-amino-2-methyl-1,3-propanediol	[M+H-H2O]+		C11260	Organic nitrogen compounds	Organonitrogen compounds	Amines	5.34521e+07	4.90604e+07	6.41185e+07	8.45513e+07	9.7458e+07	3.82056e+07	7.8076e+07	7.75289e+07	5.99836e+07	6.80942e+07	4.20281e+07	3.95756e+07	6.3988e+07	6.7557e+07	6.30352e+07
M169T901	168.998	900.655	2-amino-5-chlorobenzoxazole	[M+H]+		C13841				8.82849e+06	8.21464e+06	2.54808e+07	3.76977e+07	3.69107e+07	8.25448e+06	2.17824e+07	9.32642e+06	7.31543e+06	3.09194e+07	1.70132e+07	1.04365e+07	2.66612e+07	2.41189e+07	2.36326e+07
M104T359_3	104.071	358.961	2-aminoisobutyric acid	[M+H]+	HMDB0001906	C03665	Organic acids and derivatives	Carboxylic acids and derivatives	Amino acids, peptides, and analogues	2.34336e+08	1.69646e+08	1.75765e+08	2.34961e+08	1.36592e+08	2.10941e+08	1.74427e+08	3.34474e+07	1.39768e+08	1.08562e+08	2.12659e+08	1.09067e+08	1.74444e+08	1.7606e+08	1.75515e+08
M741T65	740.523	65.0741	2-arachidonoyl-1-palmitoyl-sn-glycero-3-phosphoethanolamine	[M+H]+	HMDB0008937		Lipids and lipid-like molecules	Glycerophospholipids	Glycerophosphoethanolamines	2.66258e+07	3.13778e+07	3.7421e+07	3.78016e+07	4.33683e+07	4.87144e+07	2.64171e+07	3.00631e+07	6.30458e+07	4.49055e+07	5.12379e+07	5.01531e+07	3.85447e+07	3.85566e+07	3.71184e+07
M361T59_2	361.274	59.0887	2-arachidonoylglycerol	[M+H-H2O]+	HMDB0004666	C13856				3.59233e+06	2.86186e+06	2.5032e+06	1.58353e+06	2.31472e+06	3.1173e+06	7.01136e+06	1.09859e+07	1.31886e+06	1.96896e+06	1.73568e+06	3.0505e+06	2.68933e+06	2.98407e+06	2.6989e+06
M263T399	263.112	399.213	2-furanpropanoic acid, 3-carboxy-4-methyl-5-propyl-	[M+Na]+	HMDB0061112		Lipids and lipid-like molecules	Fatty Acyls	Fatty acids and conjugates	7.56104e+07	7.23378e+07	5.9557e+07	6.0179e+07	6.65271e+07	5.95523e+07	1.08798e+08	1.08294e+08	4.81684e+07	4.53897e+07	5.74092e+07	7.29919e+07	6.13704e+07	5.99029e+07	5.98374e+07
M83T311_2	83.0862	311.224	2-hexen-1-ol, (z)-	[M+H-H2O]+			Lipids and lipid-like molecules	Fatty Acyls	Fatty alcohols	2.77432e+07	2.68575e+07	2.83362e+07	3.7667e+07	2.81058e+07	2.78847e+07	2.68668e+07	2.62701e+07	2.75965e+07	2.62962e+07	2.79872e+07	2.67214e+07	2.68243e+07	2.68284e+07	2.65192e+07
M138T940	138.128	940.452	2h-indol-2-one, 1,3-dihydro-1-[(3-exo)-9-methyl-9-azabicyclo[3.3.1]non-3-yl]-	[M+H-C8H7NO]+						7.19859e+06	2.96679e+06	6.77587e+06	3.90989e+06	3.67827e+06	6.933e+06	7.1251e+06	3.3186e+06	7.00123e+06	4.01921e+06	7.04603e+06	3.77682e+06	6.28156e+06	6.28126e+06	6.34933e+06
M237T451	237.075	450.866	2'-hydroxy-3-methoxychalcone	[M+H-H2O]+			Phenylpropanoids and polyketides	Linear 1,3-diarylpropanoids	Chalcones and dihydrochalcones	3.96564e+06	3.48932e+06	4.35807e+06	3.14467e+06	1.00338e+06	2.38088e+06	469804	774325	5.33146e+06	4.88354e+06	3.90468e+06	2.97919e+06	3.01901e+06	3.01909e+06	2.98375e+06
M99T233	99.0558	232.538	2-hydroxyethyl acrylate	[M+H-H2O]+			Organic acids and derivatives	Carboxylic acids and derivatives	Acrylic acids and derivatives	3.56993e+08	3.94497e+08	3.4881e+08	3.34114e+08	2.82403e+08	2.91373e+08	3.24405e+08	2.98036e+08	1.06097e+08	3.01918e+08	3.2821e+08	2.63561e+08	2.71807e+08	2.70754e+08	2.41017e+08
M113T330	113.108	330.289	2-imino-4-methylpiperidine	[M+H]+			Organoheterocyclic compounds	Pyridines and derivatives	Hydropyridines	6.49755e+06	6.85174e+06	5.39808e+06	6.02749e+06	1.09381e+07	6.35961e+06	9.40164e+06	5.23702e+06	5.58131e+06	5.82501e+06	5.87819e+06	6.0097e+06	5.54932e+06	5.69275e+06	5.69571e+06
M210T193	210.088	192.78	2-isopropoxyphenyl n-methylcarbamate	[M+H]+		C14334				1.15609e+07	1.04586e+07	1.03318e+07	1.19708e+07	1.04913e+07	1.04343e+07	4.79317e+06	6.28492e+06	1.03737e+07	1.12051e+07	1.17285e+07	1.0128e+07	1.21764e+07	1.16978e+07	1.17018e+07
M337T91	337.274	91.12	2-linoleoylglycerol	[M+H-H2O]+	HMDB0011538		Lipids and lipid-like molecules	Fatty Acyls	Lineolic acids and derivatives	1.66825e+06	1.58161e+06	1.83652e+06	1.2838e+06	939413	783766	4.59529e+06	2.30146e+06	521340	911340	442475	815649	1.25478e+06	1.29195e+06	1.29165e+06
M297T56	297.082	55.6698	2-methoxy-5-methyl-3-(2-methylbut-3-en-2-yl)chromen-4-one	[M+K]+			Organoheterocyclic compounds	Benzopyrans	1-benzopyrans	159202	82423.3	58927	327092	232585	65130.2	97711.6	155285	1.12392e+06	100589	65850.1	685361	3.72793e+06	3.86508e+06	3.85449e+06
M179T925	179.118	925.319	2-methyl-6(s)-(3-pyridyl)tetrahydro-1,2-oxazine	[M+H]+			Organoheterocyclic compounds	Oxazinanes	1,2-oxazinanes	7.36396e+06	8.73142e+06	4.26466e+06	3.49062e+06	8.43937e+06	8.08611e+06	3.81639e+06	4.08324e+06	6.41227e+06	4.84788e+06	8.56164e+06	8.04492e+06	8.15351e+06	7.96628e+06	7.96603e+06
M192T148	192.124	148.284	2-methylethcathinone	[M+H]+			Organic oxygen compounds	Organooxygen compounds	Carbonyl compounds	4.92931e+06	3.7561e+06	3.19393e+06	4.42401e+06	4.81485e+06	5.25031e+06	4.22595e+06	3.45445e+06	4.70812e+06	3.2505e+06	4.71964e+06	3.38678e+06	3.72184e+06	3.41282e+06	3.08927e+06
M86T338_2	86.0971	338.068	2-methylpyrrolidine	[M+H]+		C10820				5.51068e+07	1.22189e+08	1.66717e+08	3.61702e+07	3.61559e+07	2.39659e+07	7.63244e+07	2.26258e+08	6.73178e+07	2.81537e+07	1.97685e+07	1.94325e+07	4.68229e+07	4.75605e+07	4.68224e+07
M783T249	782.57	248.84	2-oleoyl-1-palmitoyl-sn-glycero-3-phosphocholine	[M+Na]+	HMDB0007972		Lipids and lipid-like molecules	Glycerophospholipids	Glycerophosphocholines	1.69459e+09	1.43765e+09	1.84467e+09	1.39985e+09	3.03075e+09	3.75023e+09	8.03842e+08	4.17015e+09	2.37093e+09	2.50898e+09	2.49876e+09	2.06209e+09	1.95429e+09	1.9083e+09	1.91107e+09
M359T406	359.157	405.834	2-phenylaminoadenosine	[M+H]+						3.38483e+06	5.37598e+06	3.24964e+06	2.07153e+06	4.15851e+06	2.91464e+06	6.39493e+06	4.99544e+06	2.50086e+06	4.74549e+06	4.00511e+06	3.22146e+06	4.27898e+06	4.07791e+06	4.07721e+06
M161T394	161.092	393.847	2-propylbenzimidazole	[M+H]+						1.02285e+07	4.59023e+06	3.70057e+06	1.1239e+07	6.23227e+06	7.67074e+06	1.24122e+06	648785	1.04208e+07	2.00139e+07	9.3761e+06	1.4555e+07	6.51125e+06	6.52892e+06	6.19702e+06
M262T352	262.165	351.986	(2r)-3-hydroxyisovaleroylcarnitine	[M+H]+			Lipids and lipid-like molecules	Fatty Acyls	Fatty acid esters	5.21354e+07	4.85308e+07	5.20688e+07	7.1419e+07	3.65515e+07	2.84815e+07	6.88422e+07	5.9016e+07	1.11542e+07	9.96918e+06	9.71267e+06	7.83032e+06	4.05816e+07	4.15016e+07	4.058e+07
M162T380_3	162.075	379.884	3-(2-hydroxyethyl)indole	[M+H]+	HMDB0003447	C00955	Organoheterocyclic compounds	Indoles and derivatives	Indoles	7.58694e+06	6.36763e+06	1.08096e+07	5.32615e+06	1.82312e+07	1.1798e+07	1.82903e+07	9.39388e+06	8.6718e+06	9.24825e+06	1.08649e+07	4.53513e+06	1.05601e+07	1.08326e+07	1.05496e+07
M149T372_1	149.023	371.601	3,4-dihydroxymandelic acid	[M+H-2H2O]+	HMDB0001866	C05580	Benzenoids	Phenols	Benzenediols	1.85446e+07	1.87136e+07	1.85431e+07	1.86949e+07	1.80492e+07	1.82377e+07	1.86154e+07	1.88297e+07	1.85503e+07	2.17443e+07	1.9593e+07	1.90847e+07	1.84248e+07	1.86801e+07	1.86796e+07
M135T64	135.08	64.2042	3,4-dimethylbenzaldehyde	[M+H]+			Benzenoids	Benzene and substituted derivatives	Benzoyl derivatives	2.86724e+07	2.37344e+07	2.36735e+07	1.94789e+07	1.81135e+07	2.20633e+07	1.74489e+07	1.75184e+07	2.05503e+07	1.86264e+07	2.27608e+07	1.72663e+07	2.10706e+07	2.20864e+07	2.20777e+07
M363T38	363.31	37.6904	3,6,9,12-tetraoxatetracosan-1-ol	[M+H]+			Organic oxygen compounds	Organooxygen compounds	Ethers	551273	654739	686633	1.74699e+06	1.06359e+06	899657	832269	582953	762526	638249	644787	573652	1.91089e+06	1.80092e+06	1.79894e+06
M160T341_2	160.097	340.702	3-acetylindole	[M+H]+		C10619	Organoheterocyclic compounds	Indoles and derivatives	Indoles	2.41664e+06	2.59105e+06	1.92182e+06	1.90756e+06	2.72369e+06	1.68911e+06	3.2264e+06	3.36819e+06	2.05023e+06	1.5673e+06	1.83404e+06	1.32876e+06	2.33727e+06	2.3849e+06	2.38491e+06
M122T137	122.072	137.307	3-amino-2,3-dihydrobenzoic acid	[M+H-H2O]+		C12110	Organic acids and derivatives	Carboxylic acids and derivatives	Amino acids, peptides, and analogues	2.77679e+08	5.78552e+07	2.40621e+08	1.11627e+08	3.63591e+07	2.97822e+08	3.08657e+08	2.62708e+08	2.40001e+07	2.34416e+07	2.85754e+07	1.81749e+07	1.12638e+08	1.88543e+08	1.96089e+08
M154T231	154.061	230.773	3-amino-4-hydroxybenzoate	[M+H]+		C12115	Benzenoids	Benzene and substituted derivatives	Benzoic acids and derivatives	2.60602e+07	5.05524e+07	3.49308e+07	3.89829e+07	3.37369e+07	4.16846e+07	4.9861e+07	4.90642e+07	2.72061e+07	2.05112e+07	2.90383e+07	2.36053e+07	3.09771e+07	3.098e+07	2.90304e+07
M110T1016	110.072	1016.46	3-aminophenol	[M+H]+		C05058	Benzenoids	Benzene and substituted derivatives	Aniline and substituted anilines	36930	3.78351e+06	4.36186e+06	1.71756e+06	3.79703e+06	2.04507e+06	1.84429e+06	1.64022e+06	2.95925e+06	1.99063e+06	4.23972e+06	2.42237e+06	2.64478e+06	2.41606e+06	2.38258e+06
M145T301	145.076	300.861	3-aminoquinoline	[M+H]+			Organoheterocyclic compounds	Quinolines and derivatives	Aminoquinolines and derivatives	5.49648e+06	4.03283e+06	7.91698e+06	3.68883e+06	3.7907e+06	7.51936e+06	8.29269e+06	6.08513e+06	2.1186e+06	4.57591e+06	5.18194e+06	3.66246e+06	3.28806e+06	3.26987e+06	3.26987e+06
M146T444	146.118	444.279	(3-Carboxypropyl)trimethylammonium cation	M+						734050	440752	447216	394510	1.08577e+06	580651	1.12412e+06	443934	402963	352543	510213	430148	509197	474718	480706
M448T268	448.342	267.623	3-[(cholamidopropyl)dimethylammonio]-1-propanesulfonate	[M+H-C5H13SO3N]+		C11321	Lipids and lipid-like molecules	Steroids and steroid derivatives	Bile acids, alcohols and derivatives	2.09942e+07	1.78318e+07	2.24618e+07	7.20535e+06	2.29791e+07	1.6666e+07	2.09691e+07	3.71643e+07	4.92162e+06	4.09871e+06	2.10398e+07	2.78627e+06	1.67207e+07	1.67259e+07	1.63124e+07
M116T332	116.107	332.163	3-dehydrocarnitine	[M+H-CO2]+	HMDB0012154	C02636	Organic acids and derivatives	Keto acids and derivatives	Short-chain keto acids and derivatives	7.72652e+06	7.3975e+06	2.30536e+07	5.96174e+06	5.58318e+06	1.85182e+07	3.20754e+06	1.67793e+06	2.03387e+07	9.46519e+06	1.73223e+07	6.86793e+06	1.07357e+07	1.09746e+07	1.07356e+07
M412T362	412.087	362.242	3h-cyclopenta[c]quinoline, 4-(6-bromo-1,3-benzodioxol-5-yl)-3a,4,5,9b-tetrahydro-8-(1-methylethyl)-, (3ar,4s,9bs)-rel-	[M+H]+			Organoheterocyclic compounds	Quinolines and derivatives	Hydroquinolines	1.77916e+06	2.06582e+06	4.72219e+06	4.08907e+06	4.73137e+06	3.63112e+06	16007.7	23086	5.46245e+06	2.88166e+06	6.37384e+06	1.79631e+06	3.05479e+06	3.17284e+06	3.12234e+06
M154T376	154.059	376.382	3-hydroxyanthranilic acid	[M+H]+	HMDB0001476	C00632	Benzenoids	Benzene and substituted derivatives	Benzoic acids and derivatives	5.95185e+07	5.17716e+07	5.25473e+07	6.3349e+07	6.04337e+07	5.27035e+07	2.91089e+07	3.08789e+07	6.2945e+07	6.71553e+07	5.05524e+07	8.48095e+07	4.99749e+07	5.02398e+07	4.98446e+07
M248T360_2	248.149	360.366	3-hydroxybutyrylcarnitine	[M+H]+	HMDB0062735		Lipids and lipid-like molecules	Fatty Acyls	Fatty acid esters	9.244e+07	1.23001e+08	7.70643e+07	7.49379e+07	7.33661e+07	5.63278e+07	8.12649e+07	1.0853e+08	1.0974e+08	9.67092e+07	1.3539e+08	7.22271e+07	9.83455e+07	1.00363e+08	9.83073e+07
M416T281	416.337	280.553	3-hydroxyhexadecanoylcarnitine	[M+H]+			Lipids and lipid-like molecules	Fatty Acyls	Fatty acid esters	4.5932e+06	2.98619e+06	4.74365e+06	1.30749e+06	1.43278e+06	332617	4.48523e+06	1.38643e+07	21101.3	81058.2	273995	366972	2.91783e+06	2.85196e+06	2.91769e+06
M189T133	189.077	132.9	[3-Me-His2] trh	[M+2H]2+			Organic acids and derivatives	Carboxylic acids and derivatives	Amino acids, peptides, and analogues	3.8712e+06	1.29903e+07	4.93039e+06	3.58451e+06	3.85731e+06	3.21398e+06	7.50247e+06	1.539e+07	3.94982e+06	3.36692e+06	3.41874e+06	3.45754e+06	3.2014e+06	3.16696e+06	2.90056e+06
M151T235	151.097	235.208	3-methoxytyramine	[M+H-NH3]+	HMDB0000022	C05587	Benzenoids	Phenols	Methoxyphenols	406484	917991	817556	389185	922391	874147	528402	630458	705446	617776	255856	911653	1.29984e+06	1.64713e+06	1.12381e+06
M290T321	290.16	320.882	3-methylglutarylcarnitine	[M+H]+	HMDB0000552		Lipids and lipid-like molecules	Fatty Acyls	Fatty acid esters	3.32692e+07	5.21393e+06	3.89564e+07	5.74473e+06	7.15606e+07	2.38419e+07	2.79567e+07	3.65055e+07	3.01316e+06	777157	1.48073e+07	977185	2.20812e+07	2.23992e+07	2.20737e+07
M109T399	109.077	399.219	3-methyl-l-histidine	[M+H-CH3O2N]+	HMDB0000479	C01152	Organic acids and derivatives	Carboxylic acids and derivatives	Amino acids, peptides, and analogues	4.83364e+07	5.03487e+07	4.89115e+07	4.41009e+07	5.27089e+07	4.65522e+07	5.94243e+07	5.06599e+07	4.27281e+07	3.73467e+07	5.70945e+07	3.60077e+07	4.67224e+07	4.67202e+07	4.61407e+07
M93T404	93.0454	404.067	3-pyridinemethanol	[M+H-OH]+						1.12316e+07	1.38125e+07	1.30492e+07	1.05912e+07	1.14529e+06	8.2306e+06	585619	879247	2.00379e+07	1.86132e+07	1.08779e+07	1.36896e+07	1.10123e+07	1.08356e+07	1.08375e+07
M176T2_2	176.105	2.04881	4(3h)-quinazolinone, 5-fluoro-3-phenyl-2-[(1s)-1-(9h-purin-6-ylamino)propyl]-	[M+H-C14H9FN2O]+			Organoheterocyclic compounds	Imidazopyrimidines	Purines and purine derivatives	3.19633e+06	4.21494e+06	4.27107e+06	4.3932e+06	6.72156e+06	4.05701e+06	3.81165e+06	3.83502e+06	4.57354e+06	4.99371e+06	6.36538e+06	3.78385e+06	4.44333e+06	4.43156e+06	3.67191e+06
M222T433	222.029	432.865	4-amino-5-chloro-1-phenyl-6-pyridazone	[M+H]+		C18570	Organoheterocyclic compounds	Diazines	Pyridazines and derivatives	1.73348e+06	1.10761e+06	550094	984025	616068	378458	5.15031e+06	2.131e+06	1.01681e+06	1.02803e+06	1.63124e+06	770819	1.34936e+06	1.26034e+06	1.25781e+06
M193T309	193.142	308.649	4-amino-n-(tert-butyl)benzamide	[M+H]+			Benzenoids	Benzene and substituted derivatives	Benzoic acids and derivatives	2.09152e+06	1.65738e+06	1.49252e+06	2.58699e+06	1.73492e+06	1.79846e+06	1.90841e+06	2.11339e+06	1.88339e+06	1.56325e+06	1.30181e+06	1.85743e+06	1.74574e+06	1.74645e+06	1.7224e+06
M110T2_1	110.072	2.03763	4-aminophenol	[M+H]+	HMDB0001169	C02372	Benzenoids	Benzene and substituted derivatives	Aniline and substituted anilines	1.03817e+07	9.8203e+06	9.95433e+06	9.43435e+06	1.18385e+07	1.01992e+07	8.84541e+06	1.01193e+07	9.38911e+06	1.07562e+07	1.02955e+07	9.69217e+06	1.02576e+07	1.09942e+07	1.0273e+07
M95T488_2	95.0609	487.599	4-aminopyridine	[M+H]+		C13728	Organoheterocyclic compounds	Pyridines and derivatives	Aminopyridines and derivatives	7.57014e+07	5.50532e+07	8.8446e+07	5.60603e+07	7.82911e+07	1.05501e+08	9.71298e+07	1.36757e+08	4.37582e+07	5.19867e+07	5.71484e+07	2.85102e+07	5.85953e+07	5.85849e+07	5.51131e+07
M178T312	178.134	312.233	4-benzofuranethanamine, 2,3-dihydro-.alpha.-methyl-	[M+H]+						691167	557427	1.30529e+07	139440	5.23343e+06	2.01171e+07	1.06336e+06	251401	1.29191e+06	427142	1.1003e+06	1.1826e+07	3.07808e+06	3.02556e+06	3.02457e+06
M191T309_2	191.093	309.144	4-ethoxycoumarin	[M+H]+						8.91028e+06	9.34158e+06	7.88264e+06	7.0576e+06	8.2355e+06	8.59284e+06	1.49021e+07	1.29535e+07	7.20033e+06	6.4016e+06	6.66978e+06	6.54554e+06	8.45703e+06	8.19468e+06	8.45185e+06
M179T316	179.093	315.894	4-fluoro-.alpha.-pyrrolidinopentiophenone	[M+H-C4H9N]+			Organic oxygen compounds	Organooxygen compounds	Carbonyl compounds	4.6761e+07	4.74423e+07	4.24873e+07	4.38376e+07	7.73017e+06	3.16002e+07	4.21078e+06	2.59611e+06	7.22965e+07	7.32698e+07	3.08387e+07	6.25926e+07	4.0755e+07	4.07487e+07	4.03748e+07
M83T290	83.0862	289.815	4-Hexen-1-ol, (E)-	(M+H-H2O)+						5.18263e+06	5.14424e+06	5.32039e+06	1.13394e+06	6.67223e+06	1.25178e+06	5.85089e+06	5.13595e+06	5.59662e+06	7.19347e+06	4.9899e+06	4.94361e+06	5.36965e+06	5.36743e+06	4.44411e+06
M174T309	174.103	308.663	4-hydroxydebrisoquine	[M+H-H2O]+	HMDB0006468					2.93095e+06	2.63919e+06	2.16697e+06	2.19227e+06	2.26102e+06	1.98958e+06	2.57199e+06	3.29179e+06	1.32873e+06	1.30284e+06	1.51715e+06	1.25274e+06	2.08731e+06	2.10819e+06	2.08708e+06
M241T421	241.094	420.728	4'-hydroxyflavanone	[M+H]+		C14241	Phenylpropanoids and polyketides	Flavonoids	Flavans	4.44531e+06	5.20919e+06	5.97572e+06	3.98365e+06	1.57345e+06	4.75336e+06	1.683e+06	1.27239e+06	2.33865e+06	3.56826e+06	3.90154e+06	4.32741e+06	2.58467e+06	2.55478e+06	2.20558e+06
M97T205	97.0767	204.827	4-hydroxyhexenal	[M+H-H2O]+			Organic oxygen compounds	Organooxygen compounds	Carbonyl compounds	1.49404e+07	2.11428e+07	2.13795e+07	2.23213e+07	4.5183e+07	2.0134e+07	2.54461e+07	2.39866e+07	2.30509e+07	2.12143e+07	2.23388e+07	3.78835e+06	1.85289e+07	2.01934e+07	2.04761e+07
M102T442	102.092	442.394	4-hydroxy-l-isoleucine	[M+H-CH2O2]+			Organic acids and derivatives	Carboxylic acids and derivatives	Amino acids, peptides, and analogues	1.97573e+06	1.45328e+06	920557	1.46969e+06	783934	836304	1.55706e+07	3.06502e+06	1.29479e+06	1.36854e+06	1.42424e+06	983621	2.03276e+06	1.98654e+06	2.02621e+06
M139T142	139.098	142.157	4-hydroxynonenal	[M+H-H2O]+	HMDB0004362	C21642	Lipids and lipid-like molecules	Fatty Acyls	Fatty alcohols	1.148e+07	1.19915e+07	7.53429e+06	7.77046e+06	1.33323e+07	2.44373e+06	3.83464e+06	559719	5.74792e+06	1.10837e+07	1.0036e+07	1.15861e+07	1.18269e+07	1.18229e+07	1.15209e+07
M103T328	103.055	327.545	4-hydroxyphenethyl alcohol	[M+H-2H2O]+	HMDB0004284	C06044	Benzenoids	Phenols	Tyrosols and derivatives	8.92296e+06	6.56624e+06	7.33047e+06	5.08715e+06	6.03281e+06	3.7332e+06	9.18035e+06	1.13856e+07	3.02644e+06	4.90478e+06	4.683e+06	3.00203e+06	6.15198e+06	6.23329e+06	6.152e+06
M146T333	146.071	332.86	4-hydroxyquinoline	[M+H]+		C06343	Organoheterocyclic compounds	Quinolines and derivatives	Quinolones and derivatives	4.90158e+06	4.33981e+06	4.27463e+06	4.16324e+06	651424	2.30234e+06	625276	855391	4.87348e+06	5.10889e+06	3.01111e+06	3.73315e+06	4.06204e+06	4.06391e+06	3.95404e+06
M127T901	127.039	900.532	4-imidazoleacetic acid	[M+H]+	HMDB0002024	C02835	Organoheterocyclic compounds	Azoles	Imidazoles	9.65473e+06	9.55811e+06	7.47351e+06	4.5206e+06	9.61317e+06	9.22164e+06	7.52684e+06	1.732e+06	1.04736e+07	6.67301e+06	7.59032e+06	3.92345e+06	7.33018e+06	7.47319e+06	5.83543e+06
M83T150	83.061	149.656	4-methyl-1h-pyrazole	[M+H]+	HMDB0015344	C07837	Organoheterocyclic compounds	Azoles	Pyrazoles	9.33787e+06	1.0256e+07	1.05375e+07	1.06603e+07	1.70182e+07	1.21909e+07	1.18128e+07	1.15638e+07	1.31258e+07	1.17096e+07	1.16648e+07	9.79788e+06	1.28478e+07	2.11068e+07	1.1857e+07
M186T65	186.149	64.6178	4-methyl-.alpha.-ethyltryptamine	[M+H-NH3]+			Organoheterocyclic compounds	Indoles and derivatives	Indoles	1.11007e+07	1.36735e+07	5.38478e+06	1.1784e+07	1.36252e+07	6.13558e+06	9.01328e+06	1.08591e+07	9.56857e+06	1.05626e+07	1.10218e+07	1.32329e+07	1.11399e+07	1.09544e+07	1.10437e+07
M178T303_4	178.123	302.644	4-methylmethcathinone	[M+H]+	HMDB0041923		Organic oxygen compounds	Organooxygen compounds	Carbonyl compounds	1.32685e+08	1.35628e+08	1.37292e+08	1.35075e+08	1.40385e+08	1.3557e+08	1.35494e+08	1.32684e+08	1.34982e+08	1.34115e+08	1.34534e+08	1.36465e+08	1.30581e+08	1.32126e+08	1.32162e+08
M232T299	232.115	299.197	4-(methylnitrosamino)-1-(3-pyridyl)-1-butanol	[M+Na]+	HMDB0041809	C19574				2.90005e+06	1.92112e+06	658512	75094.2	1.38476e+06	4.2099e+06	1.14515e+06	1.37457e+06	1.26624e+06	770518	1.35741e+06	1.42267e+06	1.88508e+06	1.64192e+06	1.63638e+06
M453T64	453.167	64.3862	4'-o-.beta.-d-glucosyl-5-o-methylvisamminol	[M+H]+			Organoheterocyclic compounds	Benzopyrans	1-benzopyrans	1.12725e+07	6.64775e+06	6.55984e+06	4.59083e+06	6.82646e+06	5.68646e+06	5.50267e+06	4.84631e+06	5.64066e+06	4.43708e+06	2.90509e+06	5.57188e+06	6.53551e+06	6.52848e+06	6.7698e+06
M129T410	129.103	410.477	4-piperidinecarboxamide	[M+H]+	HMDB0000661	C00489	Organoheterocyclic compounds	Piperidines	Piperidinecarboxylic acids and derivatives	4.73012e+06	5.3615e+06	4.23303e+06	3.74055e+06	3.33167e+06	1.52794e+07	3.24939e+06	3.21673e+06	3.34339e+06	4.32384e+06	4.72209e+06	4.84886e+06	4.81004e+06	4.48039e+06	4.48586e+06
M361T394	361.137	394.385	4-pyrimidinamine, 5-cyclopropyl-2-[1-[(2-fluorophenyl)methyl]-1h-pyrazolo[3,4-b]pyridin-3-yl]-	[M+H]+						1.88412e+06	4.34082e+06	2.96101e+06	2.45856e+06	2.24776e+06	2.42579e+06	384520	2.01431e+06	2.40486e+06	3.49159e+06	2.5411e+06	2.50462e+06	2.69791e+06	2.73501e+06	2.47703e+06
M114T426	114.067	425.933	5-aminolevulinic acid	[M+H-H2O]+	HMDB0001149	C00430	Organic acids and derivatives	Carboxylic acids and derivatives	Amino acids, peptides, and analogues	1.60689e+08	1.90469e+08	4.47117e+08	1.65541e+08	2.40804e+08	1.50177e+08	1.56123e+08	3.78563e+08	1.95051e+08	1.56647e+08	4.49462e+08	9.47572e+07	1.52984e+08	1.46136e+08	1.465e+08
M100T224	100.076	224.439	5-Aminopentanoic acid	(M+H-H2O)+	HMDB0003355	C00431	Organic acids and derivatives	Carboxylic acids and derivatives	Amino acids, peptides, and analogues	5.91925e+07	6.14206e+07	1.27519e+07	5.86533e+07	5.9043e+07	5.63433e+07	5.74979e+07	5.92048e+07	5.93516e+07	6.04373e+07	1.28372e+07	8.51835e+06	6.02442e+07	6.02453e+07	6.00597e+07
M100T109_2	100.076	108.57	5-aminovaleric acid	[M+H-H2O]+	HMDB0003355	C00431	Organic acids and derivatives	Carboxylic acids and derivatives	Amino acids, peptides, and analogues	3.03793e+07	5.78412e+07	3.38775e+07	5.86675e+07	1.5988e+08	5.76224e+07	4.18983e+08	3.48954e+08	3.95824e+07	3.29353e+07	1.88036e+07	5.92708e+06	9.0925e+07	9.3379e+07	9.08945e+07
M160T392_2	160.133	391.849	5-aminovaleric acid betaine	[M+H]+			Lipids and lipid-like molecules	Fatty Acyls	Fatty acids and conjugates	1.05811e+09	4.86085e+08	4.76814e+08	2.8925e+08	4.39381e+08	5.62299e+08	4.78091e+08	6.66502e+07	1.52946e+08	1.60737e+08	5.31136e+07	4.84485e+07	3.75784e+08	3.75754e+08	3.67137e+08
M221T340	221.115	339.639	5-hydroxy-l-tryptophan	[M+H]+	HMDB0000472	C00643	Organoheterocyclic compounds	Indoles and derivatives	Tryptamines and derivatives	1.82932e+06	2.69746e+06	1.9958e+06	1.79452e+06	2.23096e+06	2.33784e+06	2.81503e+06	3.08285e+06	1.5736e+06	1.93984e+06	1.4906e+06	2.86583e+06	2.33761e+06	2.35826e+06	2.33636e+06
M99T143	99.0558	143.256	5-methylisoxazol-3-amine	[M+H]+						5.59114e+06	2.63318e+07	7.67098e+06	7.65542e+06	1.58484e+07	7.10928e+06	7.30063e+06	6.57653e+06	6.82262e+06	7.35036e+06	1.21943e+07	5.21979e+06	7.87796e+06	8.36849e+06	8.37684e+06
M207T228	207.088	227.792	6,7-dimethylesculetin	[M+H]+	HMDB0030818	C09311				6.34211e+07	1.23447e+08	1.09983e+08	9.26575e+07	8.88429e+07	9.38299e+07	8.03008e+07	1.10508e+08	7.75041e+07	6.17695e+07	7.77818e+07	6.20575e+07	6.15095e+07	6.99282e+07	6.96453e+07
M134T308_1	134.033	308.156	6-chloroguanine	[M+H-HCl]+			Organoheterocyclic compounds	Diazines	Pyrimidines and pyrimidine derivatives	1.8399e+06	2.12634e+06	1.69277e+06	2.17376e+06	9.87304e+06	7.99689e+06	6.25371e+06	5.64594e+06	926241	932362	1.11942e+06	847267	3.19788e+06	3.29652e+06	3.19831e+06
M169T368_2	169.073	367.8	6-Hydroxydopamine	M+	HMDB0001537		Benzenoids	Phenols	Benzenediols	108302	3.55218e+06	2.76466e+06	103742	3.06586e+06	2.79407e+06	2.65961e+06	3.38527e+06	2.37754e+06	2.28564e+06	57088	3.00936e+06	2.92423e+06	2.96429e+06	2.92341e+06
M195T923	195.186	922.896	7,8-dihydro-.alpha.-ionone	[M+H]+			Lipids and lipid-like molecules	Prenol lipids	Sesquiterpenoids	9.23475e+06	1.10373e+07	6.71619e+06	5.34739e+06	4.34646e+06	1.08761e+07	1.06552e+07	1.0062e+07	1.11548e+07	8.24014e+06	1.07035e+07	1.05733e+07	1.07516e+07	1.06455e+07	1.0645e+07
M240T359	240.098	358.81	7,8-dihydrobiopterin	[M+H]+	HMDB0000038	C02953	Organoheterocyclic compounds	Pteridines and derivatives	Pterins and derivatives	4.55245e+06	7.91186e+06	1.2295e+07	7.11104e+06	1.54339e+06	8.2816e+06	1.46218e+07	1.57949e+07	9.7741e+06	8.13343e+06	6.70017e+06	9.10586e+06	8.85851e+06	8.30976e+06	8.22521e+06
M176T334	176.066	333.86	7-amino-4-methylcoumarin	[M+H]+		C01386				7.51887e+06	7.35937e+06	7.98123e+06	5.22321e+06	5.68066e+06	4.99133e+06	1.26027e+07	1.01378e+07	2.2817e+06	3.12018e+06	2.82316e+06	2.69918e+06	5.94869e+06	6.1925e+06	6.1939e+06
M294T64	294.243	64.2011	9,12-octadecadiynoic acid	[M+NH4]+			Lipids and lipid-like molecules	Fatty Acyls	Fatty acids and conjugates	3.97148e+07	4.0497e+07	3.24179e+07	4.23772e+07	5.09891e+07	2.61768e+07	3.72303e+07	4.15616e+07	3.77766e+07	3.71398e+07	3.8587e+07	3.8403e+07	3.56371e+07	3.65597e+07	3.6558e+07
M191T233	191.093	233.281	Abacavir	[M+H-C6H8O]+			Nucleosides, nucleotides, and analogues	Nucleoside and nucleotide analogues	Cyclopentyl nucleosides	1.09772e+07	1.27582e+07	1.2479e+07	8.7594e+06	1.33858e+07	1.42251e+07	1.67993e+07	1.80626e+07	7.84994e+06	7.65601e+06	1.17555e+07	1.11878e+07	1.27421e+07	1.31488e+07	1.27474e+07
M204T356_4	204.123	355.891	Acetylcarnitine	[M]+		C02571	Lipids and lipid-like molecules	Fatty Acyls	Fatty acid esters	3.35183e+09	2.83333e+09	2.88065e+09	2.85122e+09	4.36991e+09	3.5537e+09	5.43206e+09	4.01681e+09	2.70403e+09	2.82773e+09	3.31336e+09	1.91226e+09	3.53006e+09	3.52991e+09	3.55464e+09
M146T389_1	146.118	388.575	Acetylcholine	[M]+	HMDB0000895	C01996	Organic nitrogen compounds	Organonitrogen compounds	Quaternary ammonium salts	8.73806e+08	5.85294e+08	7.67117e+08	8.61901e+08	1.64819e+09	9.81369e+08	9.06074e+08	5.50856e+08	4.07024e+08	6.42714e+08	7.13451e+08	2.65026e+08	7.66209e+08	7.6627e+08	7.56148e+08
M203T362_2	203.053	361.957	Acetylsalicylic acid	[M+Na]+	HMDB0001879	C01405	Benzenoids	Benzene and substituted derivatives	Benzoic acids and derivatives	1.77467e+07	2.83751e+07	7.31035e+07	5.4139e+07	7.11195e+07	4.88831e+07	3.11448e+06	805340	6.7349e+07	3.75991e+07	9.85267e+07	2.06539e+07	3.73146e+07	3.84107e+07	3.73744e+07
M285T376	285.128	376.279	Adenosine	(M+NH4)+	HMDB0000050	C00212	Nucleosides, nucleotides, and analogues	Purine nucleosides		2.43805e+07	2.07342e+07	1.8625e+07	2.48413e+07	2.182e+07	1.86246e+07	7.37266e+06	8.87614e+06	2.48818e+07	2.8224e+07	1.92718e+07	3.88254e+07	1.8042e+07	1.81461e+07	1.80412e+07
M136T291_2	136.062	290.946	Adenosine 2'-monophosphate	[M+H-C5H9O7P]+		C00946	Organic oxygen compounds	Organooxygen compounds	Carbohydrates and carbohydrate conjugates	9.73078e+07	1.23474e+08	1.14403e+08	1.29685e+08	1.44916e+08	1.28869e+08	1.7231e+08	1.7274e+08	9.88529e+07	1.22619e+08	1.01663e+08	1.19382e+08	1.23498e+08	1.23504e+08	1.2409e+08
M348T385	348.07	384.815	Adenosine 5'-monophosphate	[M+H]+	HMDB0000045	C00020	Nucleosides, nucleotides, and analogues	Purine nucleotides	Purine ribonucleotides	7.46231e+06	6.38404e+06	1.69987e+07	1.65956e+07	4.66024e+07	1.01431e+07	2.88702e+07	3.67666e+07	9.60786e+06	9.9796e+06	2.13294e+07	6.1504e+06	1.78838e+07	1.71385e+07	1.71031e+07
M203T353	203.139	352.806	Ala-Ile	[M+H]+			Organic acids and derivatives	Carboxylic acids and derivatives	Amino acids, peptides, and analogues	5.51992e+06	4.25518e+06	4.87204e+06	5.8046e+06	1.15186e+06	1.03171e+06	1.13478e+06	729829	3.55197e+06	7.59069e+06	4.87792e+06	5.35339e+06	4.53871e+06	4.54285e+06	4.88995e+06
M218T509	218.15	508.586	Ala-Lys	[M+H]+			Organic acids and derivatives	Carboxylic acids and derivatives	Amino acids, peptides, and analogues	6.35144e+06	8.42153e+06	2.62801e+07	1.09903e+07	4.86604e+06	1.17827e+07	1.17168e+06	890349	8.73841e+06	5.78677e+06	2.67478e+06	3.24447e+06	7.9808e+06	8.08362e+06	7.98166e+06
M89T111	89.0716	110.731	Alanine	[M+H]+	HMDB0062251	C00041	Organic acids and derivatives	Carboxylic acids and derivatives	Amino acids, peptides, and analogues	1.78533e+07	1.62854e+07	535924	1.88193e+07	6.90152e+06	1.41366e+07	9.10086e+06	1.00589e+07	1.91745e+07	5.91154e+06	6.44598e+06	1.2587e+07	2.66284e+07	2.8404e+07	2.83935e+07
M253T365	253.118	364.738	Ala-Tyr	[M+H]+			Organic acids and derivatives	Carboxylic acids and derivatives	Amino acids, peptides, and analogues	1.43801e+07	8.41164e+06	8.45502e+06	1.52918e+07	2.34078e+06	9.22135e+06	632836	369054	1.57774e+07	1.40563e+07	2.27545e+07	1.22475e+07	1.02258e+07	1.04676e+07	1.02294e+07
M269T227	269.088	226.895	Allopurinol riboside	(M+H)+	HMDB0000481		Nucleosides, nucleotides, and analogues	Pyrazolo[3,4-d]pyrimidine glycosides		524498	586749	479323	513684	124320	561259	516395	578056	645586	818436	440515	412372	464585	399211	466518
M217T490	217.13	489.69	.alpha.-cyclohexylmandelic acid	[M+H-H2O]+						5.31212e+06	5.64406e+06	4.7895e+06	5.13626e+06	5.1184e+06	4.42792e+06	6.25329e+06	5.26976e+06	4.15058e+06	4.04398e+06	5.03761e+06	4.90594e+06	4.99609e+06	4.99563e+06	4.92302e+06
M413T362	413.084	362.303	.alpha.-d-mannose pentaacetate	[M+Na]+			Organic acids and derivatives	Carboxylic acids and derivatives	Pentacarboxylic acids and derivatives	7.31443e+06	8.56063e+06	1.97291e+07	1.61839e+07	1.83408e+07	1.4213e+07	638634	1.33541e+07	2.16028e+07	1.03449e+07	2.59236e+07	7.30826e+06	1.24073e+07	1.28759e+07	1.29164e+07
M296T64_3	296.258	64.2073	alpha-Linolenic acid	(M+NH4)+	HMDB0001388	C06427	Lipids and lipid-like molecules	Fatty Acyls	Lineolic acids and derivatives	2.46789e+08	2.23033e+08	1.36728e+08	2.48176e+08	2.99698e+08	1.47838e+08	2.55048e+08	2.6629e+08	2.15781e+08	2.11118e+08	2.28529e+08	2.23193e+08	2.13944e+08	2.13962e+08	2.16128e+08
M153T296	153.139	296.494	(-)-.alpha.-thujone	[M+H]+	HMDB0036115	C09906	Lipids and lipid-like molecules	Prenol lipids	Monoterpenoids	5.51149e+06	5.50159e+06	5.8376e+06	5.76515e+06	5.4717e+06	5.47963e+06	5.39364e+06	5.41817e+06	6.0141e+06	5.40016e+06	5.32724e+06	5.27756e+06	5.53526e+06	5.61798e+06	5.61797e+06
M135T311	135.092	311.176	Amifostine thiol	[M+H]+		C07651	Organic nitrogen compounds	Organonitrogen compounds	Amines	3.4562e+06	2.70442e+06	2.59178e+06	2.53842e+06	2.25774e+06	3.17548e+06	2.8449e+06	4.23795e+06	2.16949e+06	2.51174e+06	2.30663e+06	3.09522e+06	2.70731e+06	2.67587e+06	2.7074e+06
M162T380_2	161.997	379.884	Aminoadipate	[M+H]+			Organic acids and derivatives	Carboxylic acids and derivatives	Amino acids, peptides, and analogues	741066	2.06847e+06	6.09651e+06	1.41816e+06	7.11282e+06	4.48125e+06	9.04538e+06	4.32606e+06	3.24597e+06	1.92397e+06	1.95906e+06	293442	3.19006e+06	3.44007e+06	3.41596e+06
M163T941	163.123	941.246	Anabasine	[M+H]+	HMDB0004350	C06180	Alkaloids and derivatives			5.24622e+06	8.35565e+06	5.50068e+06	9.8553e+06	4.55455e+06	1.09967e+07	1.00706e+07	8.0842e+06	6.19096e+06	3.07308e+06	8.61192e+06	9.60291e+06	2.69923e+06	2.79834e+06	2.87767e+06
M484T456	484.277	456.076	Androstan-3-ol-17-one 3-glucuronide	[M+NH4]+	HMDB0004484	C11136	Lipids and lipid-like molecules	Steroids and steroid derivatives	Steroidal glycosides	2.71624e+06	3.04226e+06	3.18998e+06	2.6227e+06	2.49033e+06	2.86297e+06	4.6373e+06	3.98502e+06	1.72426e+06	1.96082e+06	2.69314e+06	1.23282e+06	2.65718e+06	2.65737e+06	2.59151e+06
M241T399_4	241.13	399.219	Anserine	[M+H]+	HMDB0000194	C01262	Organic acids and derivatives	Peptidomimetics	Hybrid peptides	2.49526e+10	2.66346e+10	2.49854e+10	2.37821e+10	2.73929e+10	2.31699e+10	2.9415e+10	2.64557e+10	2.19982e+10	1.9029e+10	2.7057e+10	2.08047e+10	2.45223e+10	2.43045e+10	2.43055e+10
M271T35	271.06	34.6339	Apigenin	[M+H]+	HMDB0002124	C01477	Phenylpropanoids and polyketides	Flavonoids	Flavones	131526	159874	281815	179338	423481	228954	5.71507e+06	3.13508e+06	237707	98726.3	57470.1	40089.9	737250	744095	737239
M356T156	356.352	155.722	Arachidoyl ethanolamide	[M+H]+			Organic nitrogen compounds	Organonitrogen compounds	Amines	1.04951e+07	6.40482e+06	8.02398e+06	5.62477e+06	4.96205e+06	5.06476e+06	4.44181e+06	4.52899e+06	6.24156e+06	4.25643e+06	4.79751e+06	1.13646e+07	1.7453e+07	1.74536e+07	1.71236e+07
M175T526	175.119	525.556	Arginine	[M+H]+	HMDB0000517	C00062	Organic acids and derivatives	Carboxylic acids and derivatives	Amino acids, peptides, and analogues	6.4066e+08	5.67915e+08	1.30651e+09	4.1219e+08	1.1339e+09	4.84697e+08	7.01438e+08	1.4088e+09	6.13947e+08	4.81079e+08	6.90856e+08	7.40269e+08	7.36903e+08	9.34323e+08	9.31506e+08
M283T352	283.14	352.25	Artemisinin	[M+H]+		C09538	Lipids and lipid-like molecules	Prenol lipids	Terpene lactones	8.83585e+06	1.36056e+07	1.81349e+07	1.29309e+07	6.54059e+06	5.60646e+06	1.80597e+07	2.2637e+07	9.22789e+06	5.40888e+06	7.11669e+06	8.56344e+06	1.19888e+07	1.2062e+07	1.18669e+07
M272T429_2	272.172	429.289	Asp-Arg	[M+H-H2O]+	HMDB0014712	C01479				2.8707e+06	2.02282e+06	3.41499e+06	1.54813e+06	1.3505e+06	1.15928e+06	5.19204e+06	1.99217e+06	1.94383e+06	1.1741e+06	1.37591e+06	1.58922e+06	2.08788e+06	2.09846e+06	2.12098e+06
M212T446	212.139	446.32	Atraton	[M+H]+		C19098	Organoheterocyclic compounds	Triazines	Aminotriazines	22651.7	690237	580758	455949	1.41346e+06	5.24734e+06	368023	530773	153687	522333	317107	5.08751e+06	787866	837027	787661
M153T78	153.113	78.3857	Azelaic acid	[M+H-2H2O]+	HMDB0000784	C08261	Lipids and lipid-like molecules	Fatty Acyls	Fatty acids and conjugates	1.28656e+06	1.106e+06	1.64426e+06	1.1947e+06	1.44836e+06	239229	1.63804e+06	1.33915e+06	3.45456e+06	2.44311e+06	426331	2.19898e+06	2.54149e+06	3.35981e+06	2.31386e+06
M503T398	503.235	398.272	Beclomethasone dipropionate	[M+H-H2O]+	HMDB0014538	C07813	Lipids and lipid-like molecules	Steroids and steroid derivatives	Pregnane steroids	4.54975e+06	4.72531e+06	3.6891e+06	5.09458e+06	4.97664e+06	5.14847e+06	1.08447e+07	2.90693e+06	4.67142e+06	2.26012e+06	5.22307e+06	5.88795e+06	4.68871e+06	4.69317e+06	4.34664e+06
M122T961	122.081	961.288	Benzamide	[M+H]+	HMDB0004461	C09815	Benzenoids	Benzene and substituted derivatives	Benzoic acids and derivatives	1.46484e+07	1.73427e+07	1.52725e+07	1.36963e+07	1.49634e+07	1.32426e+07	1.34365e+07	1.10217e+07	1.52955e+07	1.60257e+07	1.69274e+07	1.23082e+07	1.17472e+07	1.30338e+07	1.30364e+07
M176T389	176.128	389.39	Benzenemethanol, .alpha.-[(1r)-1-(methylamino)butyl]-, (.alpha.s)-rel-	[M+H-H2O]+			Organic nitrogen compounds	Organonitrogen compounds	Amines	1.14954e+07	8.84027e+06	1.32032e+07	5.28141e+06	1.0986e+07	1.19287e+07	1.02546e+07	5.89392e+06	7.21e+06	5.98764e+06	5.80792e+06	2.5865e+06	8.55903e+06	8.32228e+06	8.31975e+06
M551T61	551.425	60.7132	Beta-echinenone	[M+H]+		C08592	Lipids and lipid-like molecules	Prenol lipids	Tetraterpenoids	4.54888e+06	6.71566e+06	5.48909e+06	7.99249e+06	1.42761e+07	1.04186e+07	1.65579e+07	4.88965e+06	2.9778e+07	2.23544e+07	6.94956e+06	4.03394e+07	1.26029e+07	1.26025e+07	1.29281e+07
M357T548_1	357.25	548.178	.beta.-estradiol 17-valerate	[M+H]+		C12859	Lipids and lipid-like molecules	Steroids and steroid derivatives	Steroid esters	1.57426e+08	3.26729e+08	7.02227e+08	2.90659e+08	2.24242e+08	3.29413e+08	5.94768e+07	1.46382e+08	5.93611e+08	2.25059e+08	6.68057e+08	3.64157e+08	3.80182e+08	3.8131e+08	3.77968e+08
M130T73	130.086	72.6559	.beta.-Homoproline	(M+H)+						2.22104e+06	3.2575e+06	4.72166e+06	3.97314e+06	2.64548e+06	1.59763e+06	3.9319e+06	2.93031e+06	3.99643e+06	3.72135e+06	3.07128e+06	3.87552e+06	4.51895e+06	4.00014e+06	4.01002e+06
M118T346_7	118.087	346.021	Betaine	[M+H]+	HMDB0000043	C00719	Organic acids and derivatives	Carboxylic acids and derivatives	Amino acids, peptides, and analogues	2.89684e+09	2.71537e+09	2.36625e+09	2.78516e+09	3.30548e+09	2.8928e+09	3.54971e+09	1.99429e+09	3.46114e+09	3.12454e+09	4.00762e+09	2.89659e+09	3.12762e+09	3.10974e+09	3.10988e+09
M102T356	102.092	355.91	Betaine aldehyde	(M+H)+	HMDB0001252	C00576	Organic nitrogen compounds	Organonitrogen compounds	Quaternary ammonium salts	1.22895e+06	593781	698965	675406	474081	1.01146e+06	774641	616695	550596	646472	515594	504182	764009	743274	764449
M664T390	664.117	390.49	.beta.-nicotinamide adenine dinucleotide(NAD)	[M+H]+	HMDB0000902	C00003				1.99639e+07	2.97666e+07	4.0092e+07	5.30879e+07	1.04179e+08	3.61615e+07	7.47592e+07	4.53488e+07	2.21896e+07	2.28166e+07	6.32923e+07	1.08775e+07	4.12729e+07	4.12972e+07	4.04939e+07
M310T289	310.201	288.868	Beta-octylglucoside	[M+NH4]+			Lipids and lipid-like molecules	Fatty Acyls	Fatty acyl glycosides	241574	221061	214523	82912.6	182324	82697.5	257545	174078	3.1905e+06	3.34883e+06	4.74312e+06	1.99477e+06	1.2064e+06	1.20922e+06	1.21786e+06
M267T70	267.18	69.5394	Boldione	[M+H-H2O]+	HMDB0003422	C20144	Lipids and lipid-like molecules	Steroids and steroid derivatives	Androstane steroids	2.34232e+07	9.14522e+06	2.41124e+07	2.6425e+06	1.16584e+07	1.1325e+07	2.26476e+07	3.03296e+07	3.74054e+07	2.79318e+07	3.02358e+07	1.39279e+07	8.77029e+06	9.25322e+06	8.77084e+06
M381T59	381.352	59.161	Brassicasterol	[M+H-H2O]+		C08813	Lipids and lipid-like molecules	Steroids and steroid derivatives	Ergostane steroids	2.6368e+06	1.78287e+06	1.4504e+06	1.39239e+06	4.98133e+06	5.15461e+06	1.24981e+07	9.85813e+06	920928	1.58256e+06	1.29086e+06	1.00922e+06	2.35302e+06	2.38254e+06	2.33052e+06
M395T383	395.204	383.109	Brucine	[M+H]+	HMDB0060665	C09084				1.69517e+06	1.03985e+06	2.23179e+06	1.62128e+06	2.08096e+06	761200	3.74246e+06	6.85213e+06	1.17329e+06	1.71832e+06	2.21438e+06	1.80577e+06	2.16227e+06	2.16639e+06	1.9805e+06
M237T286_2	237.196	286.169	Bupirimate	[M+H-O3S]+		C18776	Organoheterocyclic compounds	Diazines	Pyrimidines and pyrimidine derivatives	3.13706e+06	2.68622e+06	2.80382e+06	2.79625e+06	2.69122e+06	2.58288e+06	2.62508e+06	3.04383e+06	2.82827e+06	2.50823e+06	3.4012e+06	2.68301e+06	2.74258e+06	2.69902e+06	2.69949e+06
M122T103	122.072	103.011	Buspirone	[M+H-C15H24O2N2]+	HMDB0014633	C06861	Organoheterocyclic compounds	Diazinanes	Piperazines	2.48686e+07	3.71243e+07	1.47529e+07	3.0597e+07	2.17595e+07	1.78027e+07	6.62813e+07	1.00404e+08	3.37754e+07	1.67567e+07	1.70373e+07	1.48912e+07	2.74943e+07	3.31745e+07	2.75167e+07
M101T124	101.071	123.547	Butanoic acid, 4-(2,4-dichlorophenoxy)-, methyl ester	[M+H-C6H4Cl2O]+			Benzenoids	Benzene and substituted derivatives	Halobenzenes	1.07907e+07	1.52684e+07	1.44584e+07	2.94951e+06	3.5518e+07	1.66306e+07	9.0185e+06	8.74009e+06	1.35913e+07	5.1869e+06	1.12289e+07	6.53843e+06	8.15803e+06	7.95781e+06	7.61557e+06
M116T305	116.119	305.041	Butylisopropylamine	[M+H]+			Organic nitrogen compounds	Organonitrogen compounds	Amines	2.74207e+06	2.88584e+06	2.65307e+06	3.493e+06	2.45952e+06	2.97451e+06	3.55302e+06	2.59718e+06	2.86167e+06	2.64035e+06	3.85091e+06	2.88793e+06	2.54699e+06	2.52749e+06	1.93335e+06
M288T64	288.29	64.344	C17-sphinganine	[M+H]+			Organic nitrogen compounds	Organonitrogen compounds	Amines	1.05891e+07	1.07012e+07	6.99044e+06	3.36023e+06	4.47006e+06	3.04247e+07	5.77754e+06	3.1853e+06	9.88927e+06	1.63688e+06	1.30579e+07	572981	1.75915e+07	1.71236e+07	1.73773e+07
M115T298	115.123	298.3	Caldine	[M+H-NH3]+	HMDB0011634	C03375	Organic nitrogen compounds	Organonitrogen compounds	Amines	9.65947e+06	9.92739e+06	9.99649e+06	1.00699e+07	1.02694e+07	1.00276e+07	9.40747e+06	9.46585e+06	1.02056e+07	9.86593e+06	9.81641e+06	9.98865e+06	1.00551e+07	1.01187e+07	1.01178e+07
M330T374	330.073	374.229	Camp	[M+H]+	HMDB0000058	C00575	Nucleosides, nucleotides, and analogues	Purine nucleotides	Cyclic purine nucleotides	161678	1.5287e+06	437033	552142	1.25026e+06	671092	4.51782e+06	1.27587e+06	223738	64767.9	2.96111e+06	13596.3	567824	537416	567806
M153T923	153.139	922.665	(+)-camphor	[M+H]+	HMDB0059838	C00808	Lipids and lipid-like molecules	Prenol lipids	Monoterpenoids	1.06171e+07	1.23691e+07	1.18769e+07	1.22163e+07	1.22043e+07	1.23443e+07	1.22524e+07	6.59694e+06	1.2789e+07	1.2013e+07	4.913e+06	1.15522e+07	1.229e+07	1.20637e+07	1.20625e+07
M237T318_3	237.098	318.392	Carbamazepine	[M+H]+	HMDB0014704	C06868	Organoheterocyclic compounds	Benzazepines	Dibenzazepines	1.2796e+08	1.19541e+08	9.41535e+07	1.10256e+08	1.09748e+08	1.12046e+08	1.55943e+08	1.74715e+08	8.03498e+07	7.49876e+07	8.59877e+07	1.07677e+08	1.14219e+08	1.1523e+08	1.14226e+08
M161T59	161.133	59.2069	(-)-caryophyllene oxide	[M+H-C3H8O]+		C16908	Lipids and lipid-like molecules	Prenol lipids	Sesquiterpenoids	3.10732e+06	4.78103e+06	2.08613e+06	1.98637e+06	1.79668e+06	2.0693e+06	3.99774e+06	3.9151e+06	1.22045e+06	1.93217e+06	2.07512e+06	5.80173e+06	2.53942e+06	2.82185e+06	2.82118e+06
M369T59_3	369.352	59.1843	Cholesterol	[M+H-H2O]+	HMDB0000067	C00187	Lipids and lipid-like molecules	Steroids and steroid derivatives	Cholestane steroids	3.7988e+08	2.27676e+08	2.78854e+08	2.43034e+08	2.28655e+08	2.42953e+08	4.54785e+08	4.79069e+08	1.28757e+08	1.77002e+08	2.66759e+08	1.90431e+08	2.12167e+08	2.12179e+08	2.09537e+08
M104T372	104.107	372.079	Choline	[M]+	HMDB0000097	C00114	Organic nitrogen compounds	Organonitrogen compounds	Quaternary ammonium salts	9.51441e+07	3.50041e+07	5.72601e+07	1.89861e+07	7.66535e+07	6.36204e+06	7.00613e+07	4.22179e+07	2.04195e+07	4.02225e+07	6.46434e+07	3.72559e+06	2.25983e+07	1.53994e+07	2.28356e+07
M375T460	375.098	459.618	Chrysosplenetin	[M+H]+		C10030	Phenylpropanoids and polyketides	Flavonoids	O-methylated flavonoids	5.09471e+06	3.40952e+06	1.03402e+07	3.4459e+06	4.31759e+06	5.73214e+06	5.07362e+06	5.4088e+06	3.70079e+06	3.50461e+06	4.63453e+06	5.65146e+06	3.2137e+06	3.25755e+06	3.25756e+06
M307T372	307.14	372.224	Cimifugin	[M+H]+		C09000	Organoheterocyclic compounds	Benzopyrans	1-benzopyrans	1.06046e+06	3.57728e+06	1.57169e+07	4.6008e+06	2.96883e+07	9.858e+06	766041	1.18803e+06	1.4199e+07	7.91099e+06	4.40538e+07	2.53672e+06	9.76436e+06	1.01246e+07	9.7587e+06
M443T275	443.233	275.49	Cinobufagin	[M+H]+		C16931	Lipids and lipid-like molecules	Steroids and steroid derivatives	Steroid lactones	1.25314e+06	1.7167e+06	646515	3.31607e+07	3.86836e+06	3.68515e+06	2.57012e+06	2.57127e+06	2.99291e+07	3.22026e+06	3.93584e+06	5.14527e+07	1.12229e+07	1.12241e+07	1.1683e+07
M436T34	436.109	33.5849	Cinosulfuron	[M+Na]+		C18818	Benzenoids	Benzene and substituted derivatives	Benzenesulfonamides	879804	496493	47041.6	9.19867e+06	348308	1.22183e+06	299296	36676.8	84506.3	82476.2	302393	36778.8	1.10184e+06	1.03121e+06	1.10088e+06
M263T362_2	263.074	362.365	Cinoxacin	[M+H]+	HMDB0014965	C08052	Organoheterocyclic compounds	Diazanaphthalenes	Benzodiazines	4.40876e+06	5.68692e+06	8.90147e+06	8.09734e+06	9.67922e+06	6.89796e+06	6.84898e+06	6.39192e+06	5.08302e+06	3.59102e+06	8.55683e+06	2.19406e+06	7.98901e+06	8.12985e+06	8.13171e+06
M321T61	321.315	61.2124	Cis-13-docosenoic acid	[M+H-H2O]+	HMDB0002068	C08316	Lipids and lipid-like molecules	Fatty Acyls	Fatty acids and conjugates	6.40279e+06	1.27929e+07	9.80339e+06	6.13827e+06	7.36774e+06	4.38658e+06	3.74974e+06	7.75309e+06	6.7783e+06	3.74518e+06	8.26356e+06	3.50174e+06	6.41722e+06	6.54442e+06	6.54424e+06
M293T62	293.284	62.0767	Cis-13-eicosenoic acid	[M+H-H2O]+	HMDB0035159		Lipids and lipid-like molecules	Fatty Acyls	Fatty acids and conjugates	2.1451e+07	2.41128e+07	6.61835e+06	2.02107e+07	3.23778e+07	8.31929e+06	2.48709e+07	2.30708e+07	1.88829e+07	1.98128e+07	2.52787e+07	2.23248e+07	1.91346e+07	1.94904e+07	1.9483e+07
M181T923	181.17	922.766	Cis-5-dodecenoic acid	[M+H-H2O]+	HMDB0000529		Lipids and lipid-like molecules	Fatty Acyls	Fatty acids and conjugates	7.93224e+06	9.30449e+06	8.863e+06	4.95328e+06	9.40632e+06	9.17839e+06	8.78973e+06	6.53062e+06	9.43688e+06	6.39502e+06	8.97315e+06	8.65158e+06	8.81854e+06	8.63255e+06	8.63474e+06
M165T2_3	165.114	1.67363	Cis-jasmone	[M+H]+	HMDB0035601	C08490	Organic oxygen compounds	Organooxygen compounds	Carbonyl compounds	6.78807e+06	1.32331e+07	1.2644e+07	1.78333e+07	1.48772e+07	1.22385e+07	1.18999e+07	1.22936e+07	2.0707e+07	1.53361e+07	1.57802e+07	1.23931e+07	8.55033e+06	7.60967e+06	8.54707e+06
M240T310	240.102	310.443	Clomazon	[M+H]+		C11095	Benzenoids	Benzene and substituted derivatives	Halobenzenes	1.26659e+06	66943.2	1.15945e+06	127392	7.11149e+06	4.34271e+06	7.03438e+06	2.61989e+06	1.0163e+06	1.42917e+06	603049	893527	1.21458e+06	1.1986e+06	659205
M128T298	128.144	298.491	Coniine	[M+H]+		C06523				3.97663e+06	4.19337e+06	3.96157e+06	3.97348e+06	4.12906e+06	3.77082e+06	3.92219e+06	3.74323e+06	4.46562e+06	3.90122e+06	4.06998e+06	3.81752e+06	4.15812e+06	4.2251e+06	4.20515e+06
M132T377_7	132.077	376.906	Creatine	[M+H]+	HMDB0000064	C00300	Organic acids and derivatives	Carboxylic acids and derivatives	Amino acids, peptides, and analogues	1.00351e+10	9.49881e+09	9.8409e+09	1.05595e+10	9.75046e+09	1.01153e+10	8.51814e+09	9.02099e+09	8.55137e+09	8.76016e+09	1.13979e+10	8.29184e+09	9.47162e+09	9.48771e+09	9.48782e+09
M114T378	114.067	378.35	Creatinine	[M+H]+	HMDB0000562	C00791	Organic acids and derivatives	Carboxylic acids and derivatives	Amino acids, peptides, and analogues	7.12948e+08	8.03376e+08	7.54838e+08	7.78008e+08	9.59282e+08	8.01047e+08	7.00558e+08	6.61731e+08	6.66251e+08	6.52787e+08	9.36773e+08	4.77171e+08	7.13171e+08	7.13646e+08	6.92401e+08
M87T429	87.0671	428.849	Crotonic acid	[M+H]+	HMDB0010720		Lipids and lipid-like molecules	Fatty Acyls	Fatty acids and conjugates	7.6049e+06	6.95427e+06	5.8346e+06	7.43311e+06	6.40651e+06	7.92832e+06	5.09511e+06	7.6382e+06	5.60179e+06	7.61153e+06	4.45853e+06	1.01214e+07	6.76621e+06	6.49867e+06	6.76606e+06
M99T78	99.0921	77.7562	Cyclizine	[M+H-C13H12]+	HMDB0015307	C06930	Benzenoids	Benzene and substituted derivatives	Diphenylmethanes	157941	5.18578e+06	4.1671e+06	6.25317e+06	3.6549e+06	4.12333e+06	5.25238e+06	3.53131e+06	5.33063e+06	2.97173e+06	4.39857e+06	3.90873e+06	3.41379e+06	4.1971e+06	3.1665e+06
M246T539	246.156	538.913	Cycloheximide	[M+H-2H2O]+		C06685	Organoheterocyclic compounds	Pyridines and derivatives	Hydropyridines	2.53825e+06	860360	4.4842e+06	3.96957e+06	3.72064e+06	4.49604e+06	1.52887e+07	1.79648e+07	7.70478e+06	7.69223e+06	4.13094e+06	9.72922e+06	1.87188e+06	2.60372e+06	3.28839e+06
M100T960	100.113	959.532	Cyclohexylamine	[M+H]+	HMDB0031404	C00571	Organic nitrogen compounds	Organonitrogen compounds	Cyclohexylamines	1.5521e+07	1.78551e+07	1.74774e+07	1.60865e+07	1.57356e+07	1.64406e+07	1.62031e+07	1.94293e+07	1.56451e+07	1.61297e+07	1.58636e+07	1.70044e+07	1.72771e+07	1.73502e+07	1.45616e+07
M274T494	274.187	493.819	Cyclopentolate	[M+H-H2O]+	HMDB0015114	C06932				3.48708e+07	2.29454e+07	2.36302e+07	1.99432e+07	1.22834e+07	1.45409e+07	1.52486e+07	7.90146e+06	1.82558e+07	2.15575e+07	2.06594e+07	1.55417e+07	1.97948e+07	1.97963e+07	1.99342e+07
M337T915	337.142	914.599	Cyclopiazonic acid	[M+H]+		C03032	Organoheterocyclic compounds	Indoles and derivatives	Indoles	7.77102e+06	7.116e+06	5.9174e+06	5.81368e+06	6.31598e+06	7.4013e+06	6.89369e+06	4.62354e+06	6.86364e+06	6.44547e+06	7.27166e+06	7.07831e+06	8.27259e+06	7.42163e+06	7.3067e+06
M255T533	255.12	532.869	Cyclopropyl(4-methoxyphenyl)phenylmethanol	[M+H]+			Benzenoids	Benzene and substituted derivatives	Diphenylmethanes	1.87305e+06	2.24819e+06	2.93754e+06	3.28002e+06	2.94844e+07	1.81638e+06	5.35809e+07	5.52841e+07	3.65468e+06	7.67948e+06	1.50961e+06	8.58844e+06	2.90421e+06	2.34188e+06	3.03927e+06
M489T394	489.115	393.634	Cytidine 5'-diphosphocholine	[M+H]+	HMDB0001413	C00307	Nucleosides, nucleotides, and analogues	Pyrimidine nucleotides	Pyrimidine ribonucleotides	5.29047e+06	6.07812e+06	2.09196e+06	2.05351e+06	2.04438e+06	2.52849e+06	2.26161e+07	1.63256e+07	1.46635e+06	1.42346e+06	3.20833e+06	1.82596e+06	5.15851e+06	4.98372e+06	5.12763e+06
M112T341	112.062	341.136	Cytosine	[M+H]+	HMDB0000630	C00380	Organoheterocyclic compounds	Diazines	Pyrimidines and pyrimidine derivatives	3.0144e+06	3.45462e+06	5.37693e+06	3.25064e+06	3.41109e+06	4.12234e+06	3.08794e+06	4.29291e+06	3.886e+06	5.60396e+06	1.7864e+06	6.00683e+06	3.99822e+06	3.97772e+06	3.97774e+06
M255T507_3	255.07	506.656	Daidzein	[M+H]+	HMDB0003312	C10208	Phenylpropanoids and polyketides	Isoflavonoids	Isoflav-2-enes	2.8027e+06	2.43499e+06	3.05542e+06	3.0451e+06	4.08303e+06	3.76113e+06	6.4047e+06	6.33852e+06	3.20417e+06	3.61633e+06	4.73192e+06	2.56188e+06	3.73393e+06	3.73128e+06	3.66355e+06
M151T925	151.087	924.903	Daimuron	[M+H-C9H10]+		C18427	Benzenoids	Benzene and substituted derivatives	Phenylpropanes	1.03677e+07	1.15413e+07	4.40333e+06	3.86047e+06	9.55028e+06	1.13187e+07	1.11545e+07	1.16927e+07	1.23058e+07	4.76925e+06	1.10039e+07	1.16785e+07	1.17526e+07	1.15963e+07	1.15951e+07
M371T55	371.101	55.1953	Decamethylcyclopentasiloxane	[M+H]+			Organometallic compounds	Organometalloid compounds	Organosilicon compounds	1.48474e+06	793923	661557	3.01956e+06	2.61201e+06	699759	1.05655e+06	1.19372e+06	9.47445e+06	1.08752e+06	646820	3.64006e+06	1.77372e+07	1.89206e+07	1.88922e+07
M157T286	157.17	286.058	Decanal	[M+H]+	HMDB0011623	C12307	Organic oxygen compounds	Organooxygen compounds	Carbonyl compounds	6.72607e+06	7.27587e+06	7.14494e+06	7.22901e+06	7.07663e+06	6.76223e+06	6.86833e+06	6.51474e+06	7.29669e+06	6.66235e+06	7.12877e+06	6.62517e+06	7.0298e+06	6.93969e+06	7.03956e+06
M247T353	247.092	353.112	Decursinol	[M+H]+		C09259	Phenylpropanoids and polyketides	Coumarins and derivatives	Pyranocoumarins	3.59331e+06	3.7941e+06	3.72715e+06	6.98205e+06	2.53671e+06	2.919e+06	926301	3.66089e+06	1.71818e+06	1.06235e+06	1.16203e+06	2.95839e+06	3.4026e+06	3.40038e+06	3.27074e+06
M281T852	281.048	852.042	Demeton s	[M+Na]+		C18978				1.04801e+07	1.71905e+07	2.11276e+07	1.90524e+07	5.42023e+06	6.84646e+07	1.27101e+07	2.27656e+07	2.41457e+07	1.77938e+07	3.31219e+07	1.10244e+07	2.0752e+07	2.33182e+07	2.19969e+07
M141T354	141.066	354.156	D-erythro-imidazolylglycerol phosphate	[M+H-H3O4P]+		C04666	Organic acids and derivatives	Organic phosphoric acids and derivatives	Phosphate esters	4.27233e+06	4.95637e+06	4.48758e+06	4.62775e+06	1.84015e+07	9.76642e+06	5.70994e+07	3.36884e+07	3.45654e+06	3.03186e+06	1.48289e+07	3.79685e+06	1.69295e+07	1.72624e+07	1.72621e+07
M197T399	197.14	399.231	Dethiobiotin	[M-H2O+H]+	HMDB0003581	C01909	Lipids and lipid-like molecules	Fatty Acyls	Fatty acids and conjugates	7.42847e+07	8.1183e+07	7.89025e+07	7.05033e+07	8.56691e+07	6.89162e+07	8.85116e+07	8.04798e+07	6.37724e+07	5.364e+07	8.37387e+07	6.07473e+07	7.76177e+07	7.18443e+07	7.76258e+07
M178T344	178.086	344.496	D-glucosaminic acid	[M+H-H2O]+		C03752	Organic acids and derivatives	Carboxylic acids and derivatives	Amino acids, peptides, and analogues	284905	430373	803225	537162	3.46718e+06	2.559e+06	3.69921e+06	5.25748e+06	223814	488089	477114	216016	1.14438e+06	1.0914e+06	1.0929e+06
M225T402	225.016	402.364	D-Glucose 6-phosphate	(M+H-2H2O)+	HMDB0001401	C00092	Organic oxygen compounds	Organooxygen compounds	Carbohydrates and carbohydrate conjugates	166600	2.58546e+06	2.33334e+07	5.57544e+06	5.08132e+07	2.10252e+07	2.19397e+07	2.40759e+07	2.44838e+07	1.63487e+07	6.91739e+07	5.21142e+06	1.56224e+07	1.56418e+07	1.45451e+07
M130T384_1	130.05	384.291	D-glutamine	[M+H-NH3]+	HMDB0003423	C00064	Organic acids and derivatives	Carboxylic acids and derivatives	Amino acids, peptides, and analogues	8.90729e+07	8.29498e+07	8.82534e+07	5.34233e+07	9.10058e+07	5.77262e+07	1.85679e+08	1.85981e+08	1.44844e+07	5.21114e+07	2.4401e+07	4.03748e+07	7.75883e+07	7.76496e+07	7.53921e+07
M87T389	87.0447	388.508	Diacetyl	[M+H]+	HMDB0003407	C00741	Organic oxygen compounds	Organooxygen compounds	Carbonyl compounds	6.86115e+06	5.00574e+06	6.32261e+06	6.79513e+06	1.2203e+07	6.99856e+06	6.75018e+06	4.35157e+06	3.26194e+06	4.7343e+06	5.74365e+06	2.87485e+06	5.84821e+06	5.84705e+06	5.66284e+06
M567T60	567.419	59.7234	Diatoxanthin	[M+H]+		C19920	Lipids and lipid-like molecules	Prenol lipids	Triterpenoids	2.13077e+06	4.14508e+06	2.46132e+06	3.32926e+06	4.94444e+06	3.92554e+06	4.45447e+06	2.08303e+06	9.57541e+06	9.16934e+06	2.67081e+06	1.35815e+07	4.95879e+06	5.015e+06	4.95886e+06
M259T54	259.169	54.0194	Dibutyl adipate	[M+H]+		C14253	Lipids and lipid-like molecules	Fatty Acyls	Fatty acid esters	2.26253e+06	1.83139e+06	3.13415e+06	1.68537e+06	1.84088e+06	1.08158e+06	1.54291e+06	1.47077e+06	1.38193e+06	1.07235e+06	1.46944e+06	1.07321e+06	5.8852e+06	6.06222e+06	6.05849e+06
M279T380	279.159	379.841	Dibutyl phthalate	[M+H]+	HMDB0033244	C14214	Benzenoids	Benzene and substituted derivatives	Benzoic acids and derivatives	1.77608e+06	1.97218e+06	2.41981e+06	2.17009e+06	1.99195e+06	1.61922e+06	6.47992e+06	2.62442e+06	1.33061e+06	1.98872e+06	2.27341e+06	2.05665e+06	2.34718e+06	2.49067e+06	2.35888e+06
M100T311_4	100.113	311.224	Dicyclohexylamine	[M+H-C6H10]+		C14686	Organic nitrogen compounds	Organonitrogen compounds	Cyclohexylamines	4.09034e+08	3.86844e+08	4.17428e+08	3.81028e+08	3.8711e+08	3.92784e+08	3.94746e+08	3.65702e+08	3.9802e+08	3.92342e+08	3.83626e+08	3.84174e+08	3.81202e+08	3.81058e+08	3.76103e+08
M531T56	531.408	55.9208	Didodecyl 3,3'-thiodipropionate oxide	[M+H]+			Organic acids and derivatives	Carboxylic acids and derivatives	Dicarboxylic acids and derivatives	3.6429e+07	2.07331e+07	1.54004e+06	3.92874e+06	7.0481e+06	2.43424e+06	4.16943e+06	410605	1.69391e+06	985881	3.3069e+06	2.21677e+06	6.51887e+06	6.67834e+06	6.51682e+06
M165T203	165.114	203.03	Dihydroconiferyl alcohol	[M+H-H2O]+		C10448	Benzenoids	Phenols	Methoxyphenols	4.65188e+06	7.20826e+06	6.67962e+06	5.72662e+06	5.76836e+06	6.03424e+06	6.04176e+06	6.05101e+06	8.08297e+06	6.77343e+06	6.10281e+06	5.85346e+06	6.24912e+06	6.24586e+06	5.88596e+06
M140T2_3	140.118	2.04804	Dimethirimol	[M+H-C3H6N2]+		C18784	Organic nitrogen compounds	Organonitrogen compounds	Amines	4.67546e+06	8.20477e+06	6.66218e+06	6.96181e+06	8.2323e+06	6.29948e+06	5.64763e+06	6.24309e+06	6.18121e+06	8.68073e+06	6.31317e+06	6.85787e+06	6.2031e+06	6.94125e+06	6.97223e+06
M111T212_1	111.056	212.239	Dimethyl adipate	[M+H-C2H8O2]+	HMDB0041606	C14570	Lipids and lipid-like molecules	Fatty Acyls	Fatty acid esters	2.13586e+08	1.40785e+08	4.00109e+08	2.25407e+08	2.27945e+08	9.96262e+07	1.69534e+08	1.58035e+08	1.30619e+08	1.52639e+08	1.07053e+08	7.55356e+07	2.60098e+08	2.59169e+08	3.04633e+08
M86T73	86.0605	73.2842	Dimethylglycine	(M+H-H2O)+	HMDB0000092	C01026	Organic acids and derivatives	Carboxylic acids and derivatives	Amino acids, peptides, and analogues	1.52228e+07	1.32723e+07	1.27855e+07	1.46066e+07	1.33852e+07	1.364e+07	1.40447e+07	1.48281e+07	2.63067e+06	1.28738e+07	1.26519e+07	1.75718e+06	1.34074e+07	1.32818e+07	1.34083e+07
M323T363	323.077	362.673	Dinitramine	[M+H]+		C18785	Benzenoids	Benzene and substituted derivatives	Aniline and substituted anilines	7.65688e+06	1.11067e+07	1.34204e+07	1.36711e+07	1.26351e+07	1.3379e+07	3.94873e+06	548667	1.48342e+07	1.04444e+07	1.4461e+07	1.10527e+07	1.13997e+07	1.16446e+07	1.13896e+07
M242T272	242.284	271.986	Dioctylamine	[M+H]+			Organic nitrogen compounds	Organonitrogen compounds	Amines	3.20091e+07	3.37989e+07	3.49972e+07	3.38345e+07	3.40341e+07	3.30991e+07	3.19324e+07	3.3375e+07	3.22528e+07	3.2687e+07	3.29335e+07	3.25738e+07	3.41024e+07	3.41027e+07	3.46899e+07
M88T296	88.0512	296.498	Dl-2,3-diaminopropionic acid	[M+H-NH3]+			Organic acids and derivatives	Carboxylic acids and derivatives	Amino acids, peptides, and analogues	1.24333e+07	9.92638e+06	7.91266e+06	1.14699e+07	1.13283e+07	8.27043e+06	9.14994e+06	1.30869e+07	9.27718e+06	1.00812e+07	6.98136e+06	1.27376e+07	9.49374e+06	9.49003e+06	1.00491e+07
M83T332	83.061	331.927	DL-2,4-Diaminobutyric acid	(M+H-2H2O)+						8.16321e+06	1.00758e+07	8.71843e+06	8.68397e+06	8.25132e+06	1.95983e+06	6.69396e+06	6.60564e+06	6.51074e+06	2.94762e+06	2.31191e+06	7.35522e+06	6.58304e+06	7.00312e+06	6.58774e+06
M116T364_5	116.071	363.553	DL-arginine	[M+H-CH5N3]+		C00792	Organic acids and derivatives	Carboxylic acids and derivatives	Amino acids, peptides, and analogues	5.60727e+08	4.74447e+08	4.83563e+08	3.93094e+08	3.94184e+08	3.16341e+08	5.32395e+08	6.97529e+08	1.85701e+08	2.1351e+08	2.5755e+08	1.69042e+08	3.93677e+08	3.98209e+08	3.97377e+08
M148T378	148.061	378.182	DL-Glutamic acid	[M+H]+	HMDB0060475	C00025	Organic acids and derivatives	Carboxylic acids and derivatives	Amino acids, peptides, and analogues	1.64133e+07	1.43272e+07	3.78398e+07	1.47056e+07	3.3132e+07	2.28992e+07	1.37631e+08	7.80531e+07	9.21298e+06	9.04527e+06	1.13237e+07	1.11888e+07	2.96813e+07	2.96828e+07	2.92481e+07
M118T346_5	118.015	345.594	Dl-homocysteine	[M+H-H2O]+	HMDB0000742	C05330	Organic acids and derivatives	Carboxylic acids and derivatives	Amino acids, peptides, and analogues	5.00957e+06	4.48971e+06	1.92571e+06	6.22097e+06	2.7073e+06	4.19882e+06	6.10909e+06	2.83219e+06	6.99066e+06	3.70331e+06	6.77245e+06	5.88894e+06	3.92877e+06	3.88256e+06	4.26418e+06
M132T334_1	132.102	333.86	DL-isoleucine	[M+H]+	HMDB0033923	C00407	Organic acids and derivatives	Carboxylic acids and derivatives	Amino acids, peptides, and analogues	1.24085e+08	1.21373e+08	1.59053e+08	8.83019e+07	9.34665e+07	1.08873e+08	1.83736e+08	2.23465e+08	4.12132e+07	5.11559e+07	4.85204e+07	4.01337e+07	1.01691e+08	1.0537e+08	1.01726e+08
M136T351	136.076	350.958	Dl-octopamine	[M+H-H2O]+		C04227	Benzenoids	Phenols	1-hydroxy-2-unsubstituted benzenoids	1.03433e+07	8.34681e+06	1.13346e+07	6.61135e+06	7.53624e+06	6.92081e+06	1.19184e+07	1.02576e+07	5.646e+06	4.98998e+06	9.26437e+06	4.46398e+06	8.09368e+06	8.31752e+06	8.31687e+06
M166T291	166.086	290.904	DL-Phenylalanine	(M+H)+	HMDB0000159	C00079	Organic acids and derivatives	Carboxylic acids and derivatives	Amino acids, peptides, and analogues	1.96994e+06	2.1305e+06	1.96323e+06	1.96201e+06	1.7372e+06	4.04295e+06	1.57835e+06	2.27542e+06	2.92566e+06	1.64018e+06	1.841e+06	2.01789e+06	1.65395e+06	1.65117e+06	1.69696e+06
M120T382	120.066	382.061	DL-threonine	[M+H]+	HMDB0000167	C00188	Organic acids and derivatives	Carboxylic acids and derivatives	Amino acids, peptides, and analogues	1.41299e+07	1.07255e+07	1.36363e+07	1.08984e+07	5.00124e+06	3.5119e+06	8.27246e+06	3.37851e+07	1.84776e+06	1.0969e+07	2.63683e+06	2.18256e+06	9.11825e+06	9.12836e+06	8.83202e+06
M182T351	182.081	350.889	DL-tyrosine	[M+H]+	HMDB0000158	C00082	Organic acids and derivatives	Carboxylic acids and derivatives	Amino acids, peptides, and analogues	2.48052e+07	1.95326e+07	2.69189e+07	1.51378e+07	1.75726e+07	1.69391e+07	3.03391e+07	2.47902e+07	1.35621e+07	1.17961e+07	2.12818e+07	1.0638e+07	1.97301e+07	1.98523e+07	1.9851e+07
M162T59_1	162.055	58.6245	D-mannosamine	[M+H-H2O]+		C03570	Organic oxygen compounds	Organooxygen compounds	Carbohydrates and carbohydrate conjugates	588787	597367	2.07616e+06	438268	759264	2.53173e+06	6.47688e+06	1.32416e+07	566089	404177	163664	297174	1.30932e+06	1.37011e+06	1.30929e+06
M137T2	137.082	2.04804	Dopamine	[M+H-NH3]+	HMDB0000073	C03758	Benzenoids	Phenols	Benzenediols	8.62125e+06	7.61502e+06	9.09067e+06	9.86947e+06	9.31176e+06	8.62769e+06	9.55376e+06	9.35942e+06	9.21174e+06	7.88443e+06	1.04739e+07	8.33751e+06	8.80823e+06	9.44727e+06	8.8417e+06
M130T900	130.05	900.458	D-pyroglutamic acid	[M+H]+		C02237	Organic acids and derivatives	Carboxylic acids and derivatives	Amino acids, peptides, and analogues	3.57766e+07	2.84969e+07	3.44508e+07	1.1648e+07	3.72295e+07	2.36343e+07	2.3729e+07	3.29892e+07	1.3223e+07	2.90819e+07	3.01533e+07	9.79354e+06	2.71668e+07	2.65893e+07	2.37676e+07
M147T207	147.077	207.466	D-sorbitol	[M+H-2H2O]+	HMDB0000247	C00794	Organic oxygen compounds	Organooxygen compounds	Carbohydrates and carbohydrate conjugates	1.02605e+06	4.11427e+06	1.36232e+06	5.81384e+06	4.00201e+06	1.99493e+06	9.9255e+06	1.22905e+07	1.02632e+06	791404	2.11353e+06	2.26343e+06	4.26009e+06	4.38866e+06	4.25883e+06
M143T372_4	143.082	371.709	Ectoine	[M+H]+		C06231	Organic acids and derivatives	Carboxylic acids and derivatives	Amino acids, peptides, and analogues	5.20259e+08	1.7559e+08	1.77843e+08	4.20296e+08	6.12162e+07	3.63226e+07	8.13152e+07	5.50043e+07	8.97435e+07	7.41675e+07	5.05814e+07	2.88362e+07	1.70072e+08	1.70013e+08	1.67658e+08
M219T362_2	219.085	361.677	(e,e)-piperic acid	[M+H]+						5.65598e+06	7.2899e+06	7.2616e+06	8.28264e+06	1.40647e+06	5.51554e+06	646916	395654	1.32011e+07	9.97124e+06	6.19375e+06	9.76353e+06	5.97055e+06	6.19365e+06	6.08693e+06
M166T309	166.053	309.018	Eflornithine	[M+H-NH3]+		C07997	Organic acids and derivatives	Carboxylic acids and derivatives	Amino acids, peptides, and analogues	3.09809e+06	4.4091e+06	3.61278e+06	3.35521e+06	4.516e+06	3.48631e+06	4.05506e+06	3.36358e+06	3.38327e+06	3.40596e+06	3.80151e+06	3.31912e+06	3.31575e+06	3.1024e+06	3.0828e+06
M303T437	303.025	437.359	Ellagic acid	[M+H]+	HMDB0002899	C10788	Phenylpropanoids and polyketides	Tannins	Hydrolyzable tannins	3.33525e+06	3.37788e+06	3.73576e+06	3.47666e+06	533485	2.42076e+06	3.00205e+06	3.07198e+06	5.84903e+06	5.55311e+06	3.48956e+06	2.94986e+06	3.03764e+06	2.99226e+06	3.03997e+06
M341T366	341.145	366.41	Eprosartan	[M+H-C4H4S]+	HMDB0015014	C07467	Benzenoids	Benzene and substituted derivatives	Benzoic acids and derivatives	4.89459e+06	1.16e+07	4.08683e+06	2.87502e+07	4.67524e+06	5.95142e+06	5.30526e+06	4.12202e+06	2.25658e+06	1.10457e+06	6.97894e+06	1.94067e+06	7.09128e+06	7.09067e+06	6.794e+06
M114T64	114.092	63.5647	.epsilon.-caprolactam	[M+H]+	HMDB0062769	C06593	Organoheterocyclic compounds	Lactams	Caprolactams	7.92824e+06	4.06347e+06	1.259e+07	4.62938e+06	1.08236e+07	6.71097e+06	4.59028e+06	2.66874e+06	2.55176e+06	1.29893e+07	3.11871e+06	7.67448e+06	6.22992e+06	8.38048e+06	6.09315e+06
M338T61_3	338.342	61.2163	Erucamide	[M+H]+			Lipids and lipid-like molecules	Fatty Acyls	Fatty amides	4.70968e+08	9.0602e+08	6.88145e+08	4.54462e+08	5.18926e+08	3.20654e+08	3.27118e+08	5.97499e+08	5.16961e+08	2.98309e+08	5.92187e+08	2.83348e+08	4.90413e+08	4.90413e+08	4.89453e+08
M62T419	62.0608	418.786	Ethanolamine	[M+H]+	HMDB0000149	C00189	Organic nitrogen compounds	Organonitrogen compounds	Amines	3.02999e+06	2.47615e+06	2.79507e+06	1.67762e+06	2.23108e+06	4.094e+06	1.33246e+06	7.23637e+06	2.94959e+06	4.09229e+06	4.16479e+06	2.37062e+06	3.14702e+06	3.00868e+06	3.00475e+06
M313T374	313.15	373.915	Eurycomalactone	[M+H-2H2O]+		C08759	Lipids and lipid-like molecules	Steroids and steroid derivatives	Steroid lactones	16915.3	290305	18994.7	119586	178722	285975	2.37785e+06	4.76889e+06	49205.5	40309	1.88001e+06	9337.96	313451	333391	320849
M161T163	161.092	163.113	Evodiamine	[M+H-C10H9N]+		C09187	Organoheterocyclic compounds	Indoles and derivatives	Pyridoindoles	530956	924399	758117	975205	2.75558e+06	1.2105e+06	4.97529e+06	1.03072e+07	237624	76684.1	310178	512240	1.3149e+06	1.31506e+06	1.35456e+06
M307T338_2	307.201	337.656	Fenazaquin	[M+H]+		C18727	Organoheterocyclic compounds	Diazanaphthalenes	Benzodiazines	1.48094e+06	3.14497e+06	1.89354e+06	2.18938e+06	6.00108e+06	5.9065e+06	3.65508e+06	1.98249e+06	644390	1.4329e+06	976818	2.59557e+06	2.67311e+06	2.67307e+06	2.6605e+06
M159T300	159.028	299.743	Fenfluramine	[M+H-C4H11N]+		C06996	Benzenoids	Benzene and substituted derivatives	Phenethylamines	1.0241e+08	1.0633e+08	8.73473e+07	8.11738e+07	1.14765e+08	1.65077e+08	7.64586e+07	2.28242e+08	9.63655e+07	1.58312e+08	8.38808e+07	7.44097e+07	7.75026e+07	8.42377e+07	8.4416e+07
M239T901	239.001	900.957	Fenpiclonil	[M+H+2i]+		C14268	Organoheterocyclic compounds	Pyrroles	Substituted pyrroles	5.6042e+07	5.92048e+07	5.85084e+07	2.56847e+07	4.94399e+07	1.77485e+07	5.16004e+07	1.16054e+07	6.57026e+07	6.15055e+07	1.93106e+07	2.90067e+07	5.24297e+07	4.9521e+07	4.87239e+07
M274T200_2	274.274	200.109	Fenpropidin	[M+H]+		C18726	Benzenoids	Benzene and substituted derivatives	Phenylpropanes	9.59338e+08	1.34159e+09	1.02621e+09	1.39295e+09	9.90909e+08	7.24788e+08	1.07694e+09	1.21431e+09	1.08285e+09	9.40896e+08	8.52588e+08	2.42596e+09	2.18877e+09	2.08517e+09	2.08612e+09
M304T235	304.285	234.636	Fenpropimorph	[M+H]+	HMDB0037270	C18787	Benzenoids	Benzene and substituted derivatives	Phenylpropanes	6.48202e+06	1.3544e+07	4.11826e+06	105596	2.09731e+06	1.09651e+07	1.64911e+06	551415	5.0488e+06	921276	2.26526e+07	250247	2.39418e+07	2.39466e+07	2.01972e+07
M165T87	165.114	86.6155	Fenuron	[M+H]+		C11224				5.75101e+06	4.24159e+06	2.87767e+06	3.59894e+06	5.96852e+06	4.77528e+06	3.98525e+06	2.79323e+06	3.53898e+06	2.80844e+06	3.69959e+06	2.81133e+06	6.1321e+06	7.61861e+06	6.00073e+06
M255T507_4	255.145	506.6	Ferimzone	[M+H]+		C18579	Benzenoids	Benzene and substituted derivatives	Toluenes	7.99896e+08	6.92126e+08	9.34306e+08	8.37044e+08	1.14726e+09	1.04879e+09	1.81352e+09	1.88571e+09	9.57682e+08	1.01472e+09	1.38632e+09	6.79765e+08	1.06851e+09	1.0685e+09	1.05775e+09
M290T238	290.269	238.473	Fingolimod	[M+H-H2O]+			Organic nitrogen compounds	Organonitrogen compounds	Amines	2.80561e+07	4.83084e+07	2.20721e+07	4.29535e+07	2.05918e+07	2.8778e+07	1.58935e+07	2.15475e+07	1.48174e+07	2.31253e+07	2.53359e+07	1.16222e+07	3.27683e+07	3.0952e+07	3.27259e+07
M223T290_1	223.083	290.393	Flavone	[M+H]+	HMDB0003075	C10043	Phenylpropanoids and polyketides	Flavonoids	Flavones	2.39331e+06	2.66422e+06	2.23524e+06	2.15486e+06	2.12418e+06	2.08224e+06	2.88316e+06	2.96951e+06	1.79586e+06	1.60743e+06	1.56285e+06	2.30847e+06	2.1774e+06	2.14439e+06	2.17613e+06
M286T332	286.114	332.154	Fludarabine	[M+H]+		C21550				4.87944e+06	5.33516e+06	4.69708e+06	3.70942e+06	3.18346e+06	3.18051e+06	2.95256e+06	528214	4.11125e+06	4.00195e+06	5.39012e+06	2.55997e+06	3.86102e+06	3.92588e+06	3.82754e+06
M248T297	248.064	296.504	Forchlorfenuron	[M+H]+		C18604	Organoheterocyclic compounds	Pyridines and derivatives	Halopyridines	4.36016e+06	1.70297e+06	614540	1.86792e+06	289925	3.41415e+06	624194	3.17096e+06	328132	354687	247808	69290.1	997238	1.00928e+06	1.00966e+06
M395T59_2	395.367	58.7968	Fucosterol	[M+H-H2O]+		C08817	Lipids and lipid-like molecules	Steroids and steroid derivatives	Stigmastanes and derivatives	2.85917e+06	1.29702e+06	1.47033e+06	1.07371e+06	5.21108e+06	5.42864e+06	6.91408e+06	5.49964e+06	970990	1.20854e+06	1.55992e+06	2.79259e+06	2.15965e+06	2.16542e+06	2.13623e+06
M122T186	122.072	185.774	Gabapentin related bis-nitrile	[M+H-HCN]+						6.06467e+07	1.12819e+08	4.47517e+07	7.29907e+07	1.00869e+08	6.20852e+07	9.96718e+07	8.66713e+07	7.37271e+07	5.45076e+07	4.87547e+07	7.00115e+07	5.28757e+07	5.31775e+07	4.80964e+07
M247T348_2	247.177	347.877	Gamma-glutamylvaline	[M+H]+	HMDB0011172		Organic acids and derivatives	Carboxylic acids and derivatives	Amino acids, peptides, and analogues	6.68173e+06	6.84718e+06	6.1722e+06	6.63769e+06	7.71075e+06	5.64427e+06	8.78937e+06	6.63003e+06	4.29407e+06	5.45591e+06	6.19449e+06	2.70965e+06	6.73166e+06	6.72041e+06	6.98625e+06
M129T385	129.066	385.049	.gamma.-heptalactone	[M+H]+	HMDB0031681		Organoheterocyclic compounds	Lactones	Gamma butyrolactones	2.56284e+07	1.81288e+07	1.4256e+07	3.19292e+07	4.32376e+07	3.2107e+07	2.14558e+07	6.85561e+06	7.61637e+06	1.16964e+07	3.78658e+07	5.19579e+06	2.07833e+07	2.08341e+07	1.94579e+07
M277T362	277.09	362.201	Gamma-l-glutamyl-l-glutamic acid	[M+H]+	HMDB0011737	C05282	Organic acids and derivatives	Carboxylic acids and derivatives	Amino acids, peptides, and analogues	3.89658e+06	3.75228e+06	1.10457e+07	5.23801e+06	8.27367e+06	7.01134e+06	4.41605e+06	2.90051e+06	1.28542e+07	9.08993e+06	6.40877e+06	2.67239e+06	7.96313e+06	7.44397e+06	7.94045e+06
M157T306	157.134	306.133	.gamma.-nonalactone	[M+H]+	HMDB0031531	C08501	Organoheterocyclic compounds	Lactones	Gamma butyrolactones	1.26124e+07	1.23025e+07	4.35937e+06	1.15855e+07	1.26898e+07	4.32085e+06	1.2346e+07	1.27331e+07	1.32261e+07	1.28131e+07	1.23343e+07	4.36807e+06	1.0807e+07	6.8651e+06	1.07973e+07
M143T332	143.118	331.624	.gamma.-octalactone	[M+H]+	HMDB0035422		Organoheterocyclic compounds	Lactones	Gamma butyrolactones	9.02798e+06	9.06328e+06	8.45941e+06	9.0688e+06	9.26111e+06	8.6705e+06	8.86158e+06	8.91259e+06	8.93797e+06	9.36968e+06	9.40183e+06	9.61561e+06	8.74074e+06	9.07358e+06	8.74e+06
M167T923_2	167.154	922.54	.gamma.-undecalactone	[M+H-H2O]+	HMDB0038311	C08571	Organoheterocyclic compounds	Lactones	Gamma butyrolactones	1.15632e+07	1.3535e+07	1.33882e+07	5.21652e+06	9.36105e+06	8.76864e+06	1.32587e+07	7.37635e+06	1.42483e+07	1.31308e+07	1.35818e+07	1.31628e+07	1.33829e+07	1.32123e+07	1.32123e+07
M359T362	359.124	361.89	Gardenin b	[M+H]+		C15109	Phenylpropanoids and polyketides	Flavonoids	O-methylated flavonoids	1.89479e+07	2.12528e+07	2.81242e+07	3.38407e+07	2.52878e+07	2.38976e+07	1.93056e+07	1.28489e+07	2.85459e+07	1.99222e+07	2.97209e+07	2.33985e+07	2.48754e+07	2.56168e+07	2.5586e+07
M297T357	297.156	356.899	Gibberellin a4	[M+H-2H2O]+		C11864	Lipids and lipid-like molecules	Prenol lipids	Diterpenoids	360380	3.34353e+06	1.64107e+06	3.61475e+06	1.83923e+06	372729	3.33487e+06	1.50736e+07	1.76985e+06	312675	1.73385e+06	305289	2.01722e+06	2.07217e+06	2.07142e+06
M361T395	361.183	395.39	Glu-Gly-Arg	[M+H]+			Organic acids and derivatives	Carboxylic acids and derivatives	Amino acids, peptides, and analogues	2.71897e+06	3.88864e+06	3.54433e+06	2.93481e+06	3.36446e+06	2.87979e+06	3.13604e+06	9.6444e+06	1.87711e+06	2.14987e+06	4.31281e+06	2.00334e+06	3.58884e+06	3.54484e+06	3.37665e+06
M147T427	147.077	426.779	Glutamine	[M+H]+	HMDB0000641	C00064	Organic acids and derivatives	Carboxylic acids and derivatives	Amino acids, peptides, and analogues	2.53957e+06	2.26691e+06	1.92958e+06	1.60438e+06	2.3781e+06	1.61309e+06	2.30989e+06	3.53896e+06	475053	1.22924e+06	823960	931645	2.67865e+06	2.6719e+06	3.02453e+06
M190T2	190.109	2.04804	Glutethimide	[M+H-CO]+	HMDB0015505	C07489	Organoheterocyclic compounds	Piperidines	Phenylpiperidines	3.0296e+06	3.90568e+06	4.35598e+06	2.5702e+06	3.69974e+06	3.60057e+06	3.96427e+06	3.90398e+06	3.77416e+06	3.85689e+06	4.90145e+06	4.70843e+06	3.4682e+06	3.71907e+06	3.4824e+06
M258T390_2	258.11	389.879	Glycerophosphocholine	[M+H]+	HMDB0000086	C00670	Lipids and lipid-like molecules	Glycerophospholipids	Glycerophosphocholines	1.15974e+09	1.07333e+09	1.00167e+09	6.79725e+08	9.60385e+08	5.07756e+08	5.25029e+09	2.34851e+09	4.31247e+08	5.11378e+08	7.38933e+08	5.20665e+08	2.14581e+09	2.14364e+09	2.10456e+09
M501T908	501.199	907.698	Gossypol	[M+H-H2O]+	HMDB0040723	C07667	Lipids and lipid-like molecules	Prenol lipids	Sesquiterpenoids	5.17285e+06	4.83537e+06	5.53413e+06	2.27262e+06	2.82589e+06	3.07455e+06	8.64956e+06	2.21891e+06	2.78935e+06	6.11619e+06	3.89697e+06	3.06575e+06	2.17328e+06	2.06483e+06	2.17378e+06
M118T64	118.065	64.1627	Guanidoacetic acid	[M+H]+	HMDB0000128	C00581	Organic acids and derivatives	Carboxylic acids and derivatives	Amino acids, peptides, and analogues	3.0236e+07	4.03064e+07	2.89724e+07	3.18366e+07	3.41145e+07	2.66404e+07	3.11464e+07	3.27426e+07	3.53954e+07	2.9725e+07	3.00419e+07	3.06998e+07	3.31842e+07	3.31743e+07	3.35624e+07
M376T354	376.159	354.203	Haloperidol	[M+H]+	HMDB0014645	C01814	Organic oxygen compounds	Organooxygen compounds	Carbonyl compounds	7.07875e+06	6.95351e+06	7.29139e+06	1.62531e+07	792634	3.33235e+06	293066	302220	3.80355e+06	2.97683e+06	2.31732e+06	3.80024e+06	5.46577e+06	5.5263e+06	5.52591e+06
M215T373	215.139	373.42	Harmaline	[M+H]+	HMDB0030310	C06536	Alkaloids and derivatives	Harmala alkaloids		2.4596e+07	2.169e+07	2.64684e+07	1.43652e+07	2.82494e+07	2.43335e+07	3.0711e+07	1.52306e+07	1.16493e+07	1.49363e+07	1.2181e+07	5.24025e+06	1.85997e+07	1.86003e+07	1.83222e+07
M298T403	298.151	403.153	Harringtonine	[M+H-C10H18O6]+		C10597				8.87139e+06	1.03368e+07	8.59684e+06	1.33005e+07	7.59096e+06	1.20702e+07	9.01516e+06	6.31212e+06	1.10966e+07	9.39064e+06	1.47679e+07	9.34567e+06	1.13752e+07	1.07826e+07	1.07945e+07
M288T93	288.29	93.2439	Heptadecasphinganine	[M+H]+			Organic nitrogen compounds	Organonitrogen compounds	Amines	1.59348e+07	1.71435e+07	9.27867e+06	5.40459e+06	8.79518e+06	3.96012e+07	7.86499e+06	5.58348e+06	1.6843e+07	2.34665e+06	1.97789e+07	2.0081e+06	1.84316e+07	2.14211e+07	1.84656e+07
M370T357	370.172	356.779	Heroin	[M+H]+		C06534				395837	234724	689124	674038	374363	43080.2	5.22078e+06	7.72757e+06	196443	88036.9	269027	24746.6	1.1098e+06	1.07259e+06	1.15037e+06
M223T55	223.064	54.9883	Hexamethylcyclotrisiloxane	[M+H]+			Organometallic compounds	Organometalloid compounds	Organosilicon compounds	480565	239431	208025	962494	778399	198465	330828	386845	3.13262e+06	278664	199208	1.13979e+06	6.5089e+06	6.51878e+06	6.69234e+06
M141T366	141.114	365.929	Hexamethylenetetramine	[M+H]+	HMDB0029598		Organoheterocyclic compounds	Triazinanes	1,3,5-triazinanes	6.46081e+06	6.68022e+06	6.41138e+06	7.05133e+06	6.80067e+06	7.10699e+06	5.65792e+06	5.89498e+06	7.45738e+06	6.87162e+06	7.27153e+06	7.91068e+06	6.52899e+06	6.56977e+06	6.57005e+06
M260T303_1	260.186	303.124	Hexanoyl-l-carnitine	[M+H]+	HMDB0000756		Lipids and lipid-like molecules	Fatty Acyls	Fatty acid esters	4.4798e+07	8.377e+07	3.85247e+07	2.41714e+07	1.80213e+07	1.72518e+07	3.29561e+07	3.88182e+07	2.50122e+07	1.59881e+07	2.31376e+07	3.00848e+07	3.29273e+07	3.34123e+07	3.30301e+07
M102T65	102.128	64.8022	Hexylamine	[M+H]+	HMDB0032323	C08306	Organic nitrogen compounds	Organonitrogen compounds	Amines	7.96362e+06	9.63251e+06	9.9723e+06	1.00772e+07	1.01122e+07	1.01755e+07	9.38416e+06	9.60012e+06	9.9537e+06	9.88142e+06	1.00478e+07	9.69704e+06	9.40558e+06	9.40712e+06	8.62356e+06
M306T339	306.081	339.055	His-Lys	[M+Na]+	HMDB0000133	C00387				1.4253e+06	1.81488e+06	1.7362e+06	245440	506784	507816	2.60407e+06	6.91825e+06	739344	598263	481408	591574	1.22163e+06	1.22179e+06	1.24312e+06
M253T406	253.13	405.881	His-Pro	[M+H]+			Organic acids and derivatives	Carboxylic acids and derivatives	Amino acids, peptides, and analogues	8.56465e+06	6.91186e+06	7.41179e+06	5.85553e+06	2.88726e+06	6.9763e+06	1.7319e+06	1.56363e+06	1.0277e+07	1.07105e+07	9.19872e+06	7.51087e+06	6.95449e+06	6.95478e+06	7.14e+06
M265T432	265.07	431.913	His-ser	[M+Na]+	HMDB0000273	C00214	Nucleosides, nucleotides, and analogues	Pyrimidine nucleosides	Pyrimidine 2'-deoxyribonucleosides	5.27371e+06	5.84116e+06	5.3413e+06	4.79141e+06	955400	2.97083e+06	181837	84020.6	9.54021e+06	8.44204e+06	4.91094e+06	6.01924e+06	4.78569e+06	4.78467e+06	4.59505e+06
M112T2_3	112.087	2.05542	Histamine	[M+H]+	HMDB0000870	C00388	Organic nitrogen compounds	Organonitrogen compounds	Amines	2.14242e+07	2.24825e+07	2.07767e+07	2.25769e+07	2.30246e+07	2.38119e+07	2.32008e+07	2.40389e+07	2.421e+07	2.38643e+07	2.29072e+07	2.50272e+07	1.98902e+07	2.12936e+07	1.99877e+07
M156T404	156.077	404.067	Histidine	[M+H]+	HMDB0000177	C00135	Organic acids and derivatives	Carboxylic acids and derivatives	Amino acids, peptides, and analogues	1.35287e+08	1.57604e+08	1.34651e+08	1.15205e+08	2.91939e+07	9.89751e+07	6.89766e+07	7.21915e+07	2.18689e+08	2.24908e+08	1.20896e+08	1.53165e+08	1.29644e+08	1.27627e+08	1.29688e+08
M183T348_2	183.062	348.1	Homovanillic acid	[M+H]+	HMDB0000118	C05582	Benzenoids	Phenols	Methoxyphenols	2.41334e+06	5.4446e+06	8.51261e+06	1.01333e+07	9.46404e+06	6.29621e+06	8.63592e+06	5.23283e+06	1.01536e+07	8.20638e+06	6.20359e+06	5.49207e+06	4.2112e+06	3.96024e+06	3.93338e+06
M158T315	158.154	314.709	Hyocholic acid	[M+H]+			Lipids and lipid-like molecules	Steroids and steroid derivatives	Bile acids, alcohols and derivatives	8.95212e+06	8.85064e+06	9.64725e+06	8.84106e+06	8.79818e+06	8.87204e+06	9.69429e+06	1.02882e+07	9.3726e+06	9.91278e+06	8.82078e+06	9.01274e+06	9.91128e+06	9.50553e+06	9.5028e+06
M137T391_2	137.046	390.842	Hypoxanthine	[M+H]+	HMDB0000157	C00262	Organoheterocyclic compounds	Imidazopyrimidines	Purines and purine derivatives	5.30919e+08	6.71379e+08	6.38198e+08	5.42011e+08	5.71908e+08	5.42197e+08	3.15138e+08	4.08031e+08	5.34468e+08	5.69884e+08	7.46785e+08	4.69216e+08	5.38685e+08	5.35503e+08	5.30342e+08
M288T364	288.203	364.048	Ile-Arg	[M+H]+			Organic acids and derivatives	Carboxylic acids and derivatives	Amino acids, peptides, and analogues	1.03477e+07	1.1367e+07	9.75459e+06	6.58854e+06	6.82405e+06	1.29569e+07	9.80211e+06	3.83603e+06	6.01974e+06	6.39046e+06	6.82729e+06	6.22559e+06	7.74858e+06	8.09893e+06	7.75041e+06
M248T453	248.112	453.006	Imazethapyr	[M+H-C3H6]+		C18865	Organic acids and derivatives	Carboxylic acids and derivatives	Amino acids, peptides, and analogues	3.38437e+06	3.62617e+06	2.37966e+06	2.79035e+06	1.36288e+06	1.73543e+06	2.47325e+06	2.68218e+06	4.81116e+06	5.10086e+06	2.52674e+06	3.95316e+06	2.89349e+06	2.89322e+06	2.80458e+06
M69T236	69.0455	236.385	Imidazole	[M+H]+	HMDB0001525	C01589	Organoheterocyclic compounds	Azoles	Imidazoles	9.86152e+06	1.03363e+07	1.00008e+07	9.5999e+06	8.67647e+06	9.29512e+06	8.27248e+06	1.05248e+07	8.95505e+06	8.657e+06	9.84886e+06	9.1997e+06	8.71332e+06	9.15153e+06	8.90202e+06
M171T350	171.077	350.408	Indalone	[M+H-C4H8]+		C19142	Organoheterocyclic compounds	Pyrans	Pyranones and derivatives	4.71959e+06	6.82999e+06	4.78439e+06	5.38963e+06	1.89938e+07	1.17525e+07	3.59265e+07	4.30578e+07	2.31979e+06	2.84273e+06	1.33871e+07	2.83222e+06	1.7238e+07	1.75253e+07	1.90872e+07
M175T288	175.087	287.947	Indole-3-acetamide	[M+H]+	HMDB0029739	C02693	Organoheterocyclic compounds	Indoles and derivatives	Indoles	6.31904e+06	5.05443e+06	4.19887e+06	3.44727e+06	4.19509e+06	2.96847e+06	3.79129e+06	7.35738e+06	2.21046e+06	2.73848e+06	2.72117e+06	2.39447e+06	3.48794e+06	3.53924e+06	3.5711e+06
M89T86	89.0603	85.645	Isobutyric acid	[M+H]+	HMDB0001873	C02632	Organic acids and derivatives	Carboxylic acids and derivatives	Carboxylic acids	9.29722e+06	8.31541e+06	7.34523e+06	4.24577e+06	5.7096e+06	9.76545e+06	7.73892e+06	8.47759e+06	1.0243e+07	7.48872e+06	8.96842e+06	8.05518e+06	8.4986e+06	8.76369e+06	8.4996e+06
M232T327_3	232.154	326.717	Isobutyryl-l-carnitine	[M+H]+	HMDB0000736		Lipids and lipid-like molecules	Fatty Acyls	Fatty acid esters	5.42499e+08	4.80469e+08	1.86417e+08	2.40869e+08	2.4844e+08	2.16429e+08	3.90632e+08	2.82608e+08	2.94454e+08	2.29598e+08	3.08921e+08	2.18865e+08	3.15588e+08	3.15672e+08	3.20279e+08
M240T446	240.145	446.471	Isoetharine	[M+H]+	HMDB0014366	C07053	Benzenoids	Phenols	Benzenediols	4.93271e+06	4.62197e+06	3.63636e+06	3.10117e+06	2.821e+06	2.49726e+06	6.82006e+06	6.68548e+06	3.91798e+06	3.86357e+06	3.45669e+06	3.7635e+06	3.9708e+06	3.97365e+06	3.85824e+06
M207T46_2	207.124	45.9947	Isoeugenyl acetate	[M+H]+	HMDB0032348					9.78469e+06	3.70424e+06	1.01635e+07	1.24605e+07	9.02705e+06	9.63969e+06	1.03571e+07	9.85212e+06	9.88442e+06	1.22386e+07	5.76933e+06	9.63689e+06	8.5532e+06	8.23792e+06	8.5555e+06
M139T925_2	139.123	924.774	Isophorone	[M+H]+	HMDB0031195	C14743	Organic oxygen compounds	Organooxygen compounds	Carbonyl compounds	5.57447e+07	6.93696e+07	4.21604e+07	5.30712e+07	5.65135e+07	6.69967e+07	6.52355e+07	6.93464e+07	5.7444e+07	5.25643e+07	3.83702e+07	6.3491e+07	5.50519e+07	5.53507e+07	2.33112e+07
M354T354	354.177	354.044	Isopropylcocaine	[M+Na]+			Benzenoids	Benzene and substituted derivatives	Benzoic acids and derivatives	1.15432e+07	1.31228e+07	1.38412e+07	3.41053e+07	3.22746e+06	5.72558e+06	1.4392e+06	3.46556e+06	7.30217e+06	5.89221e+06	4.5672e+06	9.63759e+06	1.02123e+07	1.05191e+07	1.02091e+07
M194T368	194.118	368.185	Isoproterenol	[M+H-H2O]+	HMDB0015197	C07056	Benzenoids	Phenols	Benzenediols	2.62704e+07	2.69421e+07	2.80976e+07	2.9378e+07	3.02251e+07	2.7739e+07	2.58981e+07	2.49014e+07	2.86786e+07	2.58408e+07	2.90997e+07	2.85125e+07	2.69446e+07	2.71154e+07	2.69463e+07
M246T315_2	246.17	314.914	Isovaleryl-l-carnitine	[M+H]+			Lipids and lipid-like molecules	Fatty Acyls	Fatty acid esters	3.33013e+08	3.62889e+07	6.43533e+07	1.50922e+08	1.41542e+08	5.28568e+07	2.09426e+08	2.05202e+08	1.43551e+07	1.68079e+07	3.07931e+07	1.16167e+07	1.13848e+08	1.13839e+08	1.12314e+08
M344T276	344.279	275.966	Lauroyl-l-carnitine	[M+H]+	HMDB0002250		Lipids and lipid-like molecules	Fatty Acyls	Fatty acid esters	7.9489e+06	3.21316e+06	8.2886e+06	1.51882e+06	3.04043e+06	830409	3.89e+06	5.88135e+06	91948.6	82995	344610	401441	2.97176e+06	2.95473e+06	2.95485e+06
M230T282_2	230.248	282.264	Lauryldimethylamine oxide	[M+H]+			Organic nitrogen compounds	Organonitrogen compounds	Aminoxides	4.27361e+07	8.14973e+07	4.89787e+07	6.83858e+07	5.72739e+07	4.72941e+07	6.06151e+07	4.11682e+07	3.99011e+07	4.74991e+07	5.69516e+07	1.73281e+08	1.13972e+08	1.12904e+08	1.13968e+08
M102T908	102.055	907.68	L-.beta.-homoserine	[M+H-H2O]+			Organic acids and derivatives	Carboxylic acids and derivatives	Amino acids, peptides, and analogues	6.50936e+06	2.24861e+07	2.20205e+07	1.08596e+07	1.97043e+07	2.14523e+07	2.03745e+07	1.59902e+07	9.04822e+06	1.24803e+07	1.43979e+07	7.2419e+06	2.06322e+07	1.97558e+07	1.96485e+07
M162T380_4	162.113	380.046	L-carnitine	[M+H]+	HMDB0062496	C00318	Organic nitrogen compounds	Organonitrogen compounds	Quaternary ammonium salts	1.7501e+09	1.48017e+09	2.53372e+09	1.27163e+09	4.11987e+09	2.8339e+09	4.22858e+09	2.07764e+09	1.87326e+09	1.96302e+09	2.31227e+09	1.01213e+09	2.41654e+09	2.41654e+09	2.39656e+09
M227T404_3	227.114	403.993	L-carnosine	[M+H]+	HMDB0000033	C00386	Organic acids and derivatives	Peptidomimetics	Hybrid peptides	4.78074e+09	6.10161e+09	5.38238e+09	4.67592e+09	7.54772e+08	3.80851e+09	3.87845e+07	2.52625e+07	8.83822e+09	8.66172e+09	4.77288e+09	6.34397e+09	4.80852e+09	4.7561e+09	4.77073e+09
M151T79	151.098	78.6713	L-carvone	[M+H]+	HMDB0035089	C01767	Lipids and lipid-like molecules	Prenol lipids	Monoterpenoids	3.35776e+06	3.94481e+06	4.50101e+06	3.20832e+06	3.14841e+06	2.70293e+06	4.89125e+06	6.40986e+06	8.03995e+06	3.1894e+06	1.41674e+07	3.66e+06	3.60284e+06	4.00139e+06	3.54309e+06
M245T276	245.186	275.901	Leucylleucine	[M+H]+	HMDB0028933	C11332	Organic acids and derivatives	Carboxylic acids and derivatives	Amino acids, peptides, and analogues	5.21588e+06	8.56468e+06	6.80511e+06	3.76433e+06	5.62539e+06	7.93372e+06	3.28299e+06	2.24947e+06	4.61446e+06	1.0933e+07	5.53646e+06	5.35716e+06	6.20918e+06	6.09754e+06	6.21352e+06
M260T585	260.197	584.548	Leu-Lys	(M+H)+						537121	644058	624273	556285	230809	317376	208978	254879	757721	610938	689799	357017	594963	573301	579468
M99T450	99.0558	450.058	Levulinic acid	[M+H-H2O]+	HMDB0000720		Organic acids and derivatives	Keto acids and derivatives	Gamma-keto acids and derivatives	2.63668e+06	2.5269e+06	1.82945e+06	1.91596e+06	1.71025e+06	1.99538e+06	3.50665e+06	4.9687e+06	1.31313e+06	1.9646e+06	1.26773e+06	1.72792e+06	2.10033e+06	2.10047e+06	2.08345e+06
M147T384	147.077	384.313	L-Glutamine	(M+H)+	HMDB0000641	C00064	Organic acids and derivatives	Carboxylic acids and derivatives	Amino acids, peptides, and analogues	1.05736e+08	1.06262e+08	9.65696e+07	6.71578e+07	1.00147e+08	7.80161e+07	1.61568e+08	2.19922e+08	1.45011e+07	6.25515e+07	2.8083e+07	4.44042e+07	9.14267e+07	9.14872e+07	8.88033e+07
M276T371	276.144	370.898	L-glutarylcarnitine	[M+H]+	HMDB0013130		Lipids and lipid-like molecules	Fatty Acyls	Fatty acid esters	6.08004e+06	1.19939e+06	3.42421e+06	1.7512e+06	7.42486e+06	2.67446e+06	1.72775e+06	5.78822e+06	344644	87031.8	1.6986e+06	217505	2.53728e+06	2.57823e+06	2.53698e+06
M156T354	156.077	353.926	L-Histidine	(M+H)+	HMDB0000177	C00135	Organic acids and derivatives	Carboxylic acids and derivatives	Amino acids, peptides, and analogues	3.14251e+06	5.8849e+06	4.22097e+06	4.1166e+06	1.20319e+06	899770	871008	1.64837e+06	8.84725e+06	5.74526e+06	139789	7.09747e+06	3.57046e+06	3.57053e+06	3.46245e+06
M144T535	144.102	534.653	L-homoarginine	[M+H-CH3ON]+	HMDB0000670	C01924	Organic acids and derivatives	Carboxylic acids and derivatives	Amino acids, peptides, and analogues	4.15506e+06	4.47575e+06	3.78735e+06	5.17939e+06	4.54539e+06	3.38113e+06	8.92879e+06	6.60164e+06	3.78836e+06	3.50554e+06	4.2241e+06	2.2867e+06	4.5857e+06	4.58577e+06	4.69485e+06
M173T369	173.092	368.689	L-hydroxyarginine	[M+H-H2O]+	HMDB0004224	C05933	Organic acids and derivatives	Carboxylic acids and derivatives	Amino acids, peptides, and analogues	1.90591e+06	2.09543e+06	2.31771e+06	1.74201e+06	1.75958e+06	1.24693e+06	3.92244e+06	7.70944e+06	1.89772e+06	1.32609e+06	2.68177e+06	1.01598e+06	2.18467e+06	2.21813e+06	2.18517e+06
M248T372	248.113	372.446	Linamarin	[M+H]+	HMDB0033699	C01594	Organic oxygen compounds	Organooxygen compounds	Carbohydrates and carbohydrate conjugates	1.59345e+06	1.91468e+06	2.08373e+06	1.83614e+06	3.90193e+06	3.35853e+06	9.4959e+06	3.09039e+06	2.25972e+06	2.02738e+06	5.55216e+06	991312	2.69948e+06	2.7848e+06	2.78565e+06
M197T54	197.081	53.9824	Linderane	[M+H-CH4O3]+		C09495	Organoheterocyclic compounds	Dioxanes	1,4-dioxanes	3.89919e+06	1.43086e+06	1.51515e+06	1.36992e+06	2.34613e+06	2.72982e+06	1.69691e+06	2.44247e+06	1.24008e+06	3.23614e+06	3.26201e+06	1.01358e+06	1.82257e+06	1.58254e+06	1.57966e+06
M279T64_3	279.251	64.2011	Linolenic acid	[M+H]+	HMDB0001388	C06427	Lipids and lipid-like molecules	Fatty Acyls	Lineolic acids and derivatives	2.66085e+07	2.29289e+07	7.34784e+06	2.73348e+07	3.82699e+07	8.71262e+06	2.40796e+07	2.6397e+07	2.15574e+07	1.95407e+07	2.32367e+07	2.70927e+07	2.23078e+07	2.20696e+07	2.23113e+07
M424T269	424.342	269.197	Linoleoylcarnitine	[M+H]+	HMDB0006469		Lipids and lipid-like molecules	Fatty Acyls	Fatty acid esters	3.88089e+07	3.1876e+07	5.46562e+07	1.33769e+07	1.90943e+07	1.47224e+07	2.59626e+07	2.63395e+07	2.15246e+06	3.16269e+06	7.24865e+06	2.87483e+06	2.20738e+07	2.20797e+07	2.11252e+07
M263T64_4	263.237	63.7798	Linoleoylglycine	[M+H-C2H5O2N]+			Organic acids and derivatives	Carboxylic acids and derivatives	Amino acids, peptides, and analogues	1.30417e+08	1.29167e+08	3.70023e+07	1.39191e+08	1.68672e+08	4.20382e+07	1.28431e+08	1.32285e+08	1.10607e+08	9.55022e+07	1.33483e+08	1.29036e+08	1.12429e+08	1.12992e+08	1.12426e+08
M229T353_3	229.155	352.927	L-leucyl-l-proline	[M+H]+	HMDB0011175		Organic acids and derivatives	Carboxylic acids and derivatives	Amino acids, peptides, and analogues	1.83925e+09	8.96379e+08	2.17575e+09	8.99546e+08	2.19563e+09	1.53221e+09	2.35861e+09	1.64686e+09	1.31506e+09	9.88913e+08	1.11731e+09	6.42511e+08	1.54411e+09	1.5551e+09	1.55513e+09
M150T344	150.058	343.652	L-methionine	[M+H]+	HMDB0000696	C00073	Organic acids and derivatives	Carboxylic acids and derivatives	Amino acids, peptides, and analogues	3.78794e+07	2.54396e+07	2.92123e+07	1.58717e+07	1.83353e+07	1.45952e+07	3.66856e+07	5.02197e+07	9.13185e+06	2.18087e+07	1.02556e+07	1.49057e+07	2.32761e+07	2.34038e+07	2.32768e+07
M189T495	189.135	495.089	L-ng-monomethylarginine	[M+H]+	HMDB0029416		Organic acids and derivatives	Carboxylic acids and derivatives	Amino acids, peptides, and analogues	1.20132e+07	9.21539e+06	8.1563e+06	1.01526e+07	1.3173e+07	7.90945e+06	1.29151e+07	8.79309e+06	5.36987e+06	3.17434e+06	5.52437e+06	1.77074e+06	6.33596e+06	6.33001e+06	5.95817e+06
M202T927	202.18	927.028	Lobelanidine	[M+H-C8H10O2]+		C10156	Organic nitrogen compounds	Organonitrogen compounds	Amines	7.34016e+06	7.73821e+06	7.67532e+06	3.51546e+06	7.37415e+06	4.27214e+06	7.04071e+06	7.19755e+06	5.44697e+06	7.6767e+06	7.94017e+06	3.37035e+06	7.50192e+06	7.39327e+06	7.39404e+06
M400T270	400.342	269.728	L-palmitoylcarnitine	[M+H]+	HMDB0000222	C02990	Lipids and lipid-like molecules	Fatty Acyls	Fatty acid esters	5.68265e+07	3.82248e+07	9.61666e+07	3.28633e+07	2.33403e+07	1.22976e+07	7.82947e+07	2.08301e+08	3.33276e+06	6.89404e+06	8.21228e+06	1.10768e+07	4.66357e+07	4.66671e+07	4.44454e+07
M522T275_2	522.356	274.588	Lpc 18:1	[M+H]+			Lipids and lipid-like molecules	Glycerophospholipids	Glycerophosphocholines	1.32099e+08	1.64966e+08	7.64805e+07	7.75351e+07	5.35895e+07	4.10921e+07	2.13999e+08	1.15511e+08	1.46823e+08	1.65911e+08	9.43616e+07	3.40152e+08	1.4187e+08	1.38373e+08	1.41852e+08
M520T276	520.34	276.03	Lpc 18:2	[M+H]+			Lipids and lipid-like molecules	Glycerophospholipids	Glycerophosphocholines	1.00239e+08	6.97326e+07	5.31881e+07	4.58644e+07	2.8688e+07	2.64666e+07	8.11034e+07	5.08287e+07	4.12437e+07	8.64722e+07	1.97881e+07	1.0733e+08	6.31233e+07	6.22394e+07	6.31178e+07
M115T548	115.064	547.533	L-Proline	M+	HMDB0000162	C00148	Organic acids and derivatives	Carboxylic acids and derivatives	Amino acids, peptides, and analogues	7.96859e+06	4.88654e+06	3.41672e+06	3.78501e+06	5.37291e+06	914605	1.06551e+06	5.86629e+06	5.05737e+06	1.57802e+06	5.04592e+06	1.8264e+06	5.3945e+06	5.34785e+06	3.51095e+06
M218T341_3	218.139	340.64	L-propionylcarnitine	[M+H]+	HMDB0062514		Lipids and lipid-like molecules	Fatty Acyls	Fatty acid esters	9.44713e+08	7.07001e+07	6.25999e+07	7.35365e+08	1.5392e+08	1.13627e+08	4.13353e+08	3.30044e+08	7.72285e+07	6.77765e+07	1.09982e+08	2.80113e+07	3.1793e+08	3.17896e+08	3.14875e+08
M106T411	106.05	410.736	L-Serine	(M+H)+	HMDB0000187/HMDB0062263	C00065	Organic acids and derivatives	Carboxylic acids and derivatives	Amino acids, peptides, and analogues	874033	1.96056e+06	1.61616e+06	2.73365e+06	1.54127e+06	2.13038e+06	2.59162e+06	1.9872e+06	1.42676e+06	1.54987e+06	2.00786e+06	2.37642e+06	1.65282e+06	1.63579e+06	1.65283e+06
M175T110	175.086	110.137	L-theanine	[M+H]+	HMDB0034365	C01047	Organic acids and derivatives	Carboxylic acids and derivatives	Amino acids, peptides, and analogues	7.9e+06	9.59319e+06	1.02904e+07	7.10733e+06	9.36215e+06	6.29729e+06	1.00133e+07	8.55588e+06	6.36484e+06	5.29469e+06	6.38871e+06	9.54356e+06	8.29962e+06	7.92926e+06	7.94618e+06
M407T355	407.239	355.383	L-tryptophanamide	[2M+H]+		C00977	Organoheterocyclic compounds	Indoles and derivatives	Tryptamines and derivatives	2.06443e+07	8.2255e+06	9.76959e+06	6.07664e+06	4.92794e+07	2.15053e+07	5.48692e+07	2.06013e+07	7.48416e+06	7.29383e+06	1.49203e+07	1.92954e+06	1.69819e+07	1.73113e+07	1.69827e+07
M182T419	182.081	418.702	L-Tyrosine	(M+H)+	HMDB0000158	C00082				735061	2.87241e+06	443699	1.01237e+06	3.36332e+06	1.60841e+06	573783	3.17257e+06	2.224e+06	226846	644366	826555	970770	2.41812e+06	2.44085e+06
M387T59_1	387.289	58.7262	Luffariellolide	[M+H]+		C19901	Lipids and lipid-like molecules	Prenol lipids	Terpene lactones	2.29307e+06	1.61544e+06	5.00794e+06	906409	564515	818089	1.47683e+06	1.57846e+06	773926	1.68513e+06	671992	1.10026e+06	1.2095e+06	1.25195e+06	1.20965e+06
M165T913_2	165.021	913.184	Lumazine	[M+H]+		C03212				3.5169e+06	2.53717e+06	2.24925e+06	2.35161e+06	2.88444e+06	2.27045e+06	1.78936e+06	1.92246e+06	2.46027e+06	1.81652e+06	2.91935e+06	2.55453e+06	2.25717e+06	2.16562e+06	2.1667e+06
M147T514	147.113	513.719	Lysine	[M+H]+	HMDB0000182	C00047	Organic acids and derivatives	Carboxylic acids and derivatives	Amino acids, peptides, and analogues	5.69801e+07	4.96781e+07	5.60569e+07	3.1104e+07	4.43871e+07	2.60965e+07	5.86913e+07	7.6186e+07	2.17576e+07	7.48015e+06	3.89101e+06	6.24021e+06	4.01783e+07	4.13523e+07	4.13512e+07
M127T830	127.039	830.146	Maltol	[M+H]+	HMDB0030776	C11918	Organoheterocyclic compounds	Pyrans	Pyranones and derivatives	2.49092e+06	3.3967e+06	3.70529e+06	3.04412e+06	4.52884e+06	2.31859e+06	2.84373e+06	2.95232e+06	4.08637e+06	3.11448e+06	4.44286e+06	2.9357e+06	3.36206e+06	3.26614e+06	3.26584e+06
M127T341_2	127.05	340.678	Melamine	[M+H]+	HMDB0041922	C08737	Organoheterocyclic compounds	Triazines	1,3,5-triazines	4.54902e+06	1.16062e+06	1.99172e+06	2.44461e+06	1.85131e+06	987771	1.43379e+06	1.73416e+06	1.14293e+06	1.12808e+06	1.15515e+06	1.17267e+06	2.0045e+06	2.01225e+06	2.00448e+06
M203T335	203.09	335.129	Metamitron	[M+H]+		C10930	Organoheterocyclic compounds	Triazines	1,2,4-triazines	1.86184e+07	1.67336e+07	1.76733e+07	1.58348e+07	2.58984e+06	1.08062e+07	133588	90053.2	2.47777e+07	2.59584e+07	1.39866e+07	2.06263e+07	1.5579e+07	1.66639e+07	1.66382e+07
M251T353	251.137	352.536	Methaqualone	[M+H]+	HMDB0240285	C07560	Organoheterocyclic compounds	Diazanaphthalenes	Benzodiazines	5.78663e+06	1.8316e+06	5.86021e+06	1.83274e+06	8.01635e+06	3.52529e+06	1.03912e+07	4.26607e+06	3.24477e+06	1.87694e+06	2.51689e+06	911229	4.0209e+06	4.09656e+06	4.11396e+06
M212T291	212.103	291.116	Methyldopa	[M+H]+		C07194	Phenylpropanoids and polyketides	Phenylpropanoic acids		7.2175e+06	6.18037e+06	6.1382e+06	5.89336e+06	9.37322e+06	3.84683e+06	8.63269e+06	7.06373e+06	4.35723e+06	3.36544e+06	5.82835e+06	4.3676e+06	6.19689e+06	6.52569e+06	6.22372e+06
M74T348	74.072	348.42	Methylguanidine	[M+H]+	HMDB0001522	C02294	Organic nitrogen compounds	Organonitrogen compounds	Guanidines	4.74744e+07	9.1339e+07	4.77069e+07	5.44592e+07	3.33688e+07	8.58652e+07	5.83105e+07	1.06352e+08	2.85025e+07	4.1642e+07	2.44191e+07	5.28077e+07	4.10484e+07	4.10471e+07	4.12374e+07
M227T296	227.125	296.363	Metyrapone	[M+H]+	HMDB0015146	C07205	Organic oxygen compounds	Organooxygen compounds	Carbonyl compounds	7.29304e+06	1.4157e+07	1.96181e+07	1.01202e+07	1.63705e+07	2.25836e+07	3.7599e+06	3.11275e+06	2.82636e+07	1.21614e+07	2.229e+07	7.11464e+06	1.34664e+07	1.35608e+07	1.34658e+07
M210T416	210.134	415.723	Minoxidil	[M+H]+	HMDB0014494		Organic nitrogen compounds	Organonitrogen compounds	Amines	1.54013e+07	3.18265e+07	3.14558e+07	1.73416e+07	1.98524e+07	1.90018e+07	1.40148e+07	1.46438e+07	1.65526e+07	1.94043e+07	1.9214e+07	1.83815e+07	2.04671e+07	2.33527e+07	2.0394e+07
M101T232	101.071	231.905	Monomethyl glutaric acid	[M+H-CH2O2]+	HMDB0000858		Lipids and lipid-like molecules	Fatty Acyls	Fatty acid esters	2.0784e+07	7.9294e+06	1.62547e+07	1.49053e+07	1.77712e+07	1.67933e+07	1.56897e+07	7.34611e+06	1.52285e+07	1.31134e+07	1.64284e+07	1.51253e+07	1.214e+07	1.43011e+07	1.42974e+07
M193T332	193.109	331.976	Myristicine	[M+H]+	HMDB0035873	C10480				8.81372e+06	7.94415e+06	2.62283e+07	8.63561e+06	8.49455e+06	5.85715e+06	1.33878e+07	4.31921e+06	4.89846e+06	6.62115e+06	6.94442e+06	6.59867e+06	8.17943e+06	9.23216e+06	9.23131e+06
M272T201	272.259	201.282	Myristoyl ethanolamide	[M+H]+			Organic nitrogen compounds	Organonitrogen compounds	Amines	6.74434e+06	1.07914e+07	1.20429e+07	9.61345e+06	7.905e+06	6.0101e+06	4.15187e+06	9.34739e+06	9.69176e+06	6.06113e+06	1.00355e+07	1.9782e+07	1.92411e+07	1.90142e+07	1.91865e+07
M253T333	253.1	332.694	N-2-hydroxyethylpiperazine-n-3-propanesulfonic acid	[M+H]+			Organoheterocyclic compounds	Diazinanes	Piperazines	1.36613e+06	962249	1.13233e+06	773593	3.2624e+06	2.14158e+06	3.79325e+06	1.83097e+06	1.00231e+06	566448	977504	642358	1.47747e+06	1.55281e+06	1.47708e+06
M170T432	170.033	432.322	N-3,4-tridhydroxybenzamide	[M+H]+			Benzenoids	Benzene and substituted derivatives	Benzoic acids and derivatives	2.48969e+06	2.1336e+06	2.91677e+06	2.69704e+06	3.95423e+06	2.32535e+06	2.59887e+06	2.12075e+06	3.06319e+06	2.39802e+06	3.66983e+06	1.7537e+06	2.7301e+06	2.83128e+06	2.73009e+06
M171T300	171.149	299.543	N8-acetylspermidine	[M+H-NH3]+	HMDB0002189	C01029	Organic acids and derivatives	Carboximidic acids and derivatives	Carboximidic acids	5.19245e+06	7.6394e+06	6.99539e+06	5.26487e+06	4.68038e+06	5.99374e+06	4.39936e+06	4.46502e+06	5.04264e+06	6.20915e+06	7.78685e+06	6.52191e+06	6.06579e+06	6.49666e+06	6.07437e+06
M244T339	244.079	339.119	N-acetyl-.beta.-d-mannosamine	[M+Na]+	HMDB0001129	C00645	Organic oxygen compounds	Organooxygen compounds	Carbohydrates and carbohydrate conjugates	1.193e+06	1.06411e+06	1.74571e+06	549892	909518	479633	3.69614e+06	1.0189e+07	404609	449979	887943	260095	1.19895e+06	1.23776e+06	1.23594e+06
M244T359	244.093	358.894	N-acetyl-d-glucosamine	[M+Na]+	HMDB0000215	C00140	Organic oxygen compounds	Organooxygen compounds	Carbohydrates and carbohydrate conjugates	9.45822e+06	1.15788e+07	1.07137e+07	1.02433e+07	1.05552e+07	8.74105e+06	1.8235e+07	1.45839e+07	8.62634e+06	6.75156e+06	1.05534e+07	8.29019e+06	1.05864e+07	1.07624e+07	1.06324e+07
M100T462	100.051	461.516	N-acetylglycine methyl ester	[M+H-CH4O]+			Organic acids and derivatives	Carboxylic acids and derivatives	Amino acids, peptides, and analogues	1.66032e+06	1.50411e+06	1.81664e+06	1.57215e+06	1.41693e+06	1.61241e+06	1.14113e+06	2.31163e+06	1.69745e+06	1.50897e+06	1.23645e+06	1.78271e+06	1.54571e+06	1.49063e+06	1.49253e+06
M154T282	154.098	281.62	N-acetylhistamine	[M+H]+	HMDB0013253	C05135	Organic acids and derivatives	Carboxylic acids and derivatives	Carboxylic acid derivatives	8.0459e+07	4.37798e+07	6.65479e+07	4.39037e+07	3.12249e+07	3.27668e+07	9.90674e+07	1.90381e+08	1.12475e+07	2.52203e+07	2.37452e+07	1.13411e+07	5.81766e+07	5.72073e+07	5.72105e+07
M198T404	198.088	404.024	N-acetylhistidine	[M+H]+	HMDB0014748	C02997	Organic acids and derivatives	Carboxylic acids and derivatives	Amino acids, peptides, and analogues	2.84939e+07	3.56436e+07	3.25368e+07	2.72703e+07	4.32615e+06	2.28165e+07	358434	3.49029e+06	5.30839e+07	5.11668e+07	2.9009e+07	3.87594e+07	2.9095e+07	2.89579e+07	2.87817e+07
M132T394_1	132.049	393.866	N-acetyl-l-alanine	[M+H]+	HMDB0000766		Organic acids and derivatives	Carboxylic acids and derivatives	Amino acids, peptides, and analogues	3.92089e+06	7.49393e+06	6.26865e+06	6.48035e+06	9.70763e+06	5.90212e+06	3.06623e+08	4.21402e+06	1.90079e+07	8.12781e+06	8.93244e+06	5.67813e+06	4.53855e+06	4.45286e+06	4.53944e+06
M291T354	291.106	353.94	N-acetyl-l-carnosine	[M+Na]+			Organic acids and derivatives	Peptidomimetics	Hybrid peptides	9.2967e+06	1.52053e+07	2.63748e+07	1.60213e+07	4.84176e+06	5.40697e+06	1.63384e+06	2.64089e+06	2.23572e+07	1.07466e+07	1.07993e+07	1.11987e+07	1.34486e+07	1.34516e+07	1.38066e+07
M198T364	198.087	364.455	N-Acetyl-L-Histidine	(M+H)+						8.04847e+06	8.41149e+06	6.44639e+06	7.99788e+06	7.73357e+06	7.54045e+06	1.13433e+07	1.05207e+07	206812	4.46333e+06	7.4347e+06	6.10783e+06	7.11362e+06	7.50102e+06	7.50667e+06
M274T361	274.092	361.151	N-acetylneuraminic acid	[M+H-2H2O]+	HMDB0000230	C00270	Organic oxygen compounds	Organooxygen compounds	Carbohydrates and carbohydrate conjugates	3.62187e+06	1.15463e+06	3.49445e+06	1.7597e+06	3.32856e+06	2.09713e+06	7.46802e+06	6.70957e+06	1.29175e+06	1.79495e+06	2.964e+06	1.38907e+06	2.90662e+06	3.04791e+06	2.90718e+06
M226T391	226.084	390.986	N-acetyl-o-fluoro-dl-phenylalanine	[M+H]+			Organic acids and derivatives	Carboxylic acids and derivatives	Amino acids, peptides, and analogues	1.52173e+07	1.2515e+07	9.28978e+06	8.21538e+06	9.29201e+06	6.84896e+06	5.03593e+07	2.24375e+07	5.67706e+06	6.90382e+06	7.1282e+06	1.21226e+07	2.43703e+07	2.43611e+07	2.37872e+07
M666T370	666.132	369.765	NADH	[M+H]+	HMDB0001487	C00004				457804	664056	692379	2.57223e+06	1.99388e+06	571634	1.24608e+06	3.01378e+06	2.20676e+06	406406	5.30418e+06	398857	1.46713e+06	1.54377e+06	1.54236e+06
M312T370	312.166	369.708	Nalorphine	[M+H]+		C11787				1.60605e+06	1.33041e+06	1.25632e+06	108040	2.04087e+06	966495	4.50417e+06	5.08184e+06	594535	585268	1.88008e+06	444208	1.4538e+06	1.4937e+06	1.45328e+06
M328T367	328.161	367.442	Naloxone	[M+H]+	HMDB0015314	C07252				1.63606e+06	1.62456e+06	3.73156e+06	2.1906e+06	3.52545e+06	2.19432e+06	7.64958e+06	9.83857e+06	1.7988e+06	1.09308e+06	3.53302e+06	838135	2.56102e+06	2.61416e+06	2.56166e+06
M189T525_1	189.135	525.005	N-alpha-acetyl-l-lysine	[M+H]+		C12989	Organic acids and derivatives	Carboxylic acids and derivatives	Amino acids, peptides, and analogues	3.10216e+06	4.59387e+06	9.25149e+06	3.60538e+06	1.84237e+07	2.71795e+06	5.50967e+06	4.79951e+06	8.29921e+06	1.85413e+06	1.18665e+07	1.1676e+06	9.22235e+06	8.93632e+06	9.69895e+06
M110T404	110.072	404.062	N-.alpha.-(tert-butoxycarbonyl)-l-histidine	[M+H-C6H10O4]+			Organic acids and derivatives	Carboxylic acids and derivatives	Amino acids, peptides, and analogues	1.97642e+08	2.49986e+08	2.22502e+08	1.88741e+08	3.41858e+07	1.54337e+08	2.59257e+07	3.27225e+07	3.63443e+08	3.57983e+08	2.02614e+08	2.55778e+08	1.99938e+08	1.97609e+08	1.98558e+08
M232T471	232.166	471.438	N-.alpha.-(tert-butoxycarbonyl)-l-isoleucine	[M+H]+			Organic acids and derivatives	Carboxylic acids and derivatives	Amino acids, peptides, and analogues	8.84288e+06	7.80411e+06	7.25411e+06	4.18181e+06	6.3804e+06	5.34757e+06	3.59826e+06	5.50006e+06	3.11772e+06	537257	2.41747e+06	1.88888e+06	4.51047e+06	4.5363e+06	4.15365e+06
M342T363	342.177	363.187	Naltrexone	[M+H]+	HMDB0014842	C07253				2.0062e+06	1.55505e+06	3.12215e+06	2.16902e+06	2.80297e+06	2.22266e+06	1.40031e+07	6.52764e+06	1.30459e+06	904406	2.35813e+06	685593	2.24869e+06	2.31789e+06	2.24875e+06
M788T266	787.669	266.303	N-docosanoyl-4-sphingenyl-1-o-phosphorylcholine	[M+H]+	HMDB0012103		Lipids and lipid-like molecules	Sphingolipids	Phosphosphingolipids	2.16286e+07	2.04315e+07	2.15712e+07	2.18333e+07	2.8685e+07	2.34094e+07	3.40849e+07	2.22808e+07	2.30289e+07	2.73374e+07	4.74445e+07	2.65216e+07	2.12428e+07	2.12285e+07	2.16207e+07
M186T283	186.222	282.929	N-dodecylamine	[M+H]+			Organic nitrogen compounds	Organonitrogen compounds	Amines	1.64754e+06	4.45001e+06	1.96924e+06	5.07228e+06	3.62516e+06	4.23646e+06	7.49949e+06	2.15699e+06	2.33937e+06	2.27041e+06	2.83096e+06	2.63683e+07	6.27962e+06	6.20428e+06	6.20403e+06
M189T371	189.123	371.142	Ne-acetyllysine	[M+H]+	HMDB0000206	C02727	Organic acids and derivatives	Carboxylic acids and derivatives	Amino acids, peptides, and analogues	1.31093e+07	1.31655e+07	1.27311e+07	9.68768e+06	1.48192e+07	8.23929e+06	1.34411e+07	2.83226e+07	1.11052e+07	1.06767e+07	1.76688e+07	5.76077e+06	1.23119e+07	1.24279e+07	1.23131e+07
M262T369	262.128	369.293	Neolinustatin	[M+H-C6H10O5]+		C08336	Organic oxygen compounds	Organooxygen compounds	Carbohydrates and carbohydrate conjugates	1.64499e+07	2.54861e+07	4.03009e+06	6.49868e+07	3.84521e+06	8.63872e+06	5.73988e+06	1.92604e+06	5.40261e+06	2.72205e+06	3.16224e+07	3.33904e+06	1.22382e+07	1.2778e+07	1.27793e+07
M87T58	87.0923	57.6108	Neopentyl glycol	[M+H-H2O]+			Organic oxygen compounds	Organooxygen compounds	Alcohols and polyols	6.95993e+06	1.40634e+07	7.54999e+06	293800	3.27724e+07	301482	1.64011e+07	2.3407e+06	3.39617e+07	9.14916e+06	3.21844e+07	97331.8	1.14233e+07	1.14066e+07	7.86466e+06
M211T367	211.105	367.454	N.epsilon.-acetyl-l-lysine	[M+Na]+	HMDB0000206	C02727	Organic acids and derivatives	Carboxylic acids and derivatives	Amino acids, peptides, and analogues	1.66537e+07	1.38454e+07	1.38833e+07	9.04544e+06	1.95452e+07	9.64587e+06	1.14118e+07	1.7036e+07	1.17531e+07	6.28369e+06	1.21862e+07	2.90918e+06	1.21823e+07	1.25586e+07	1.25598e+07
M192T305	192.138	305.096	N-ethyl-n-methylcathinone	[M+H]+			Organic oxygen compounds	Organooxygen compounds	Carbonyl compounds	1.69823e+07	1.48812e+07	1.43775e+07	1.38153e+07	1.34379e+07	1.39274e+07	1.45901e+07	1.4256e+07	1.43556e+07	1.24086e+07	1.39278e+07	1.48496e+07	1.44113e+07	1.46778e+07	1.44131e+07
M267T429	267.145	428.895	Nevirapine	[M+H]+	HMDB0014383	C07263	Organic nitrogen compounds	Organonitrogen compounds	Amines	341614	885708	1.03223e+06	297568	1.86886e+06	600332	751393	482322	806437	352708	746910	451997	688158	665530	865061
M190T384	190.144	384.123	Ng-amino-l-arginine	[M+H]+			Organic acids and derivatives	Carboxylic acids and derivatives	Amino acids, peptides, and analogues	1.53658e+07	2.2118e+07	1.23425e+07	1.79634e+07	1.87006e+07	2.44075e+07	2.14463e+07	5.96829e+06	2.24733e+07	2.10504e+07	1.19064e+07	8.52924e+06	1.64652e+07	1.64695e+07	1.59043e+07
M203T483	203.15	483.164	Ng,ng-dimethyl-l-arginine	[M+H]+	HMDB0001539	C03626	Organic acids and derivatives	Carboxylic acids and derivatives	Amino acids, peptides, and analogues	2.66749e+07	1.90381e+07	2.95022e+07	1.92352e+07	2.38313e+07	2.29779e+07	2.1291e+07	3.76631e+07	2.26743e+07	6.2336e+06	2.23953e+07	1.06625e+07	2.2754e+07	2.28419e+07	2.42735e+07
M182T373	182.118	372.941	N-hexanoyl-l-homoserine lactone	[M+H-H2O]+		C21197	Organic acids and derivatives	Carboxylic acids and derivatives	Amino acids, peptides, and analogues	167470	1.39697e+06	343502	1.77765e+06	4.67044e+06	4.39901e+06	5.28472e+06	1.0809e+06	2.22497e+06	122320	802258	9.04604e+06	1.01197e+06	1.03318e+06	1.02876e+06
M123T127_1	123.056	127.177	Niacinamide	[M+H]+	HMDB0001406	C00153	Organoheterocyclic compounds	Pyridines and derivatives	Pyridinecarboxylic acids and derivatives	1.59041e+10	5.73613e+09	7.37977e+09	6.24653e+09	6.76517e+09	6.6427e+09	1.38096e+10	1.75617e+10	1.32755e+10	8.10193e+08	6.32518e+09	1.31497e+10	8.68186e+09	9.94703e+09	8.63042e+09
M271T313	271.104	312.853	Nitenpyram	[M+H]+			Organoheterocyclic compounds	Pyridines and derivatives	Halopyridines	1.15042e+07	1.15847e+07	9.87692e+06	1.00577e+07	1.09465e+07	9.45406e+06	1.64083e+07	1.68025e+07	7.75973e+06	6.80667e+06	9.80095e+06	7.83135e+06	1.09861e+07	1.10969e+07	1.09843e+07
M162T380_5	162.15	379.901	N-methylephedrine	[M+H-H2O]+			Benzenoids	Benzene and substituted derivatives	Phenylpropanes	7.01734e+06	5.88143e+06	1.12714e+07	4.89089e+06	1.8609e+07	1.1754e+07	1.89455e+07	9.16308e+06	9.06442e+06	8.29486e+06	1.00779e+07	4.04215e+06	1.05068e+07	1.05452e+07	1.04415e+07
M116T127_2	116.107	126.541	N-methyl-n-(tetrahydro-2-furanylmethyl)-4-piperidinamine	[M+H-C5H9N]+			Organoheterocyclic compounds	Piperidines	Aminopiperidines	4.82565e+06	3.20756e+06	5.66972e+06	6.06822e+06	4.93086e+06	5.91478e+06	6.28464e+06	6.20468e+06	6.18444e+06	6.4343e+06	6.61329e+06	5.88194e+06	4.22826e+06	4.65045e+06	4.35517e+06
M118T989	118.123	989.436	N,n-diethyl-2-aminoethanol	[M+H]+	HMDB0033971		Organic nitrogen compounds	Organonitrogen compounds	Amines	2.93401e+06	3.96791e+06	3.51046e+06	8.51928e+06	1.10924e+07	1.10682e+07	7.48598e+06	4.12149e+06	2.91729e+06	9.94669e+06	2.85098e+06	7.71999e+06	4.27917e+06	5.40752e+06	3.91079e+06
M102T335_2	102.067	335.214	N-nitroso-n-methyl-3-aminopropionic acid	[M+H-HNO]+			Organic nitrogen compounds	Organonitrogen compounds	Organic nitroso compounds	4.87938e+07	4.96541e+07	4.27305e+07	5.31157e+07	4.9159e+07	5.18928e+07	3.99724e+07	4.27935e+07	4.17988e+07	5.00396e+07	4.23148e+07	6.05447e+07	4.94833e+07	4.94781e+07	4.90003e+07
M189T520_2	189.16	519.812	N,n,n-trimethyllysine	[M+H]+	HMDB0001325	C03793	Organic acids and derivatives	Carboxylic acids and derivatives	Amino acids, peptides, and analogues	2.92118e+08	2.26234e+08	2.20992e+08	2.35508e+08	1.76448e+08	1.23489e+08	2.07277e+08	2.25371e+08	1.64277e+08	1.47818e+08	2.24782e+08	1.26842e+08	2.07504e+08	1.95115e+08	2.07609e+08
M732T268_1	731.607	268.125	N-(octadecanoyl)sphing-4-enine-1-phosphocholine	[M+H]+	HMDB0001348	C00550	Lipids and lipid-like molecules	Sphingolipids	Phosphosphingolipids	9.37033e+08	8.90105e+08	9.56366e+08	8.06715e+08	1.08688e+09	9.08102e+08	8.79891e+08	1.08339e+09	7.55632e+08	8.98782e+08	1.03056e+09	8.48301e+08	9.00356e+08	8.91928e+08	8.92062e+08
M730T267	729.591	266.955	N-oleoyl-d-erythro-sphingosylphosphorylcholine	[M+H]+	HMDB0012101		Lipids and lipid-like molecules	Sphingolipids	Phosphosphingolipids	5.18087e+06	6.70462e+06	4.69219e+06	9.07125e+06	5.5213e+06	7.0475e+06	6.44983e+06	8.22955e+06	5.24914e+06	8.39453e+06	9.29288e+06	6.6198e+06	6.89589e+06	6.8199e+06	6.89523e+06
M102T512	102.092	511.935	N.omega.-propyl-l-arginine	[M+H-C5H9O2N]+			Organic acids and derivatives	Carboxylic acids and derivatives	Amino acids, peptides, and analogues	7.3295e+06	6.45044e+06	5.52912e+06	4.03972e+06	3.71443e+06	4.78732e+06	8.68519e+06	9.55132e+06	4.15962e+06	3.91617e+06	4.45995e+06	3.83079e+06	2.60338e+06	4.2808e+06	4.20376e+06
M320T372	320.133	372.123	Norfloxacin	[M+H]+	HMDB0015192	C06687	Organoheterocyclic compounds	Quinolines and derivatives	Quinoline carboxylic acids	1.79608e+06	2.96091e+06	2.64713e+06	2.35762e+06	2.2284e+06	2.475e+06	5.67528e+06	4.56887e+06	1.32835e+06	786549	3.17078e+06	442909	2.2613e+06	2.29276e+06	2.29274e+06
M132T75	132.102	75.4642	Norleucine	[M+H]+	HMDB0001645	C01933	Organic acids and derivatives	Carboxylic acids and derivatives	Amino acids, peptides, and analogues	5.03637e+07	4.6404e+07	4.23674e+07	4.92788e+07	4.41433e+07	4.36825e+07	4.75655e+07	4.74883e+07	4.59538e+07	4.01044e+07	4.36188e+07	4.42223e+07	4.61089e+07	4.54645e+07	4.61055e+07
M256T64	256.263	64.1843	N-palmitoyl-d-sphingosine	[M+H-C18H34O2]+	HMDB0004949		Lipids and lipid-like molecules	Sphingolipids	Ceramides	2.37269e+08	2.25485e+08	1.604e+08	2.26496e+08	2.61344e+08	1.64256e+08	2.25614e+08	2.50486e+08	2.45268e+08	1.91618e+08	2.72526e+08	2.38464e+08	2.1249e+08	2.14533e+08	2.12499e+08
M128T333	128.082	332.726	N-phenyl-1-naphthylamine	[M+H-C6H6N]+		C14405				5.69481e+06	5.96713e+06	4.88401e+06	6.02384e+06	6.25381e+06	5.30084e+06	6.3976e+06	9.18116e+06	4.54889e+06	4.59418e+06	5.025e+06	4.58884e+06	5.80711e+06	5.94047e+06	5.80586e+06
M130T224	130.061	223.61	O-acetyl-l-serine	[M+H-H2O]+	HMDB0003011	C00979	Organic acids and derivatives	Carboxylic acids and derivatives	Amino acids, peptides, and analogues	1.70371e+07	4.44983e+07	7.64523e+06	4.53902e+07	4.2693e+07	4.39533e+07	4.21845e+06	4.11857e+07	3.18001e+07	2.98375e+07	4.51291e+07	6.44321e+06	2.5929e+07	3.12681e+07	3.15403e+07
M288T289	288.217	289.235	Octanoylcarnitine	[M+H]+	HMDB0000791		Lipids and lipid-like molecules	Fatty Acyls	Fatty acid esters	1.80121e+07	1.86105e+07	1.37226e+07	5.68802e+06	3.92119e+06	1.69947e+06	7.8722e+06	8.92691e+06	1.66299e+06	829140	1.42238e+06	3.52697e+06	7.72343e+06	7.72302e+06	7.78964e+06
M313T423	313.15	423.454	Olanzapine	[M+H]+	HMDB0005012	C07322				560906	756603	1.17842e+06	816326	1.65723e+06	1.02297e+06	1.52473e+06	2.14169e+06	1.2567e+06	1.20136e+06	1.92353e+06	545654	1.11077e+06	1.11105e+06	1.14446e+06
M282T63_3	282.279	63.3536	Oleamide	[M+H]+	HMDB0002117	C19670	Lipids and lipid-like molecules	Fatty Acyls	Fatty amides	4.6782e+09	4.75812e+09	1.65954e+09	4.7524e+09	6.22301e+09	1.9166e+09	4.61e+09	5.20645e+09	4.36794e+09	3.75493e+09	5.42022e+09	4.7508e+09	4.23484e+09	4.24829e+09	4.23484e+09
M310T62_3	310.31	62.057	Oleoyl ethylamide	[M+H]+			Lipids and lipid-like molecules	Fatty Acyls	Fatty amides	1.32848e+09	1.35638e+09	4.1249e+08	1.26501e+09	1.94629e+09	5.60754e+08	1.4688e+09	1.49357e+09	1.22132e+09	1.15126e+09	1.56502e+09	1.31665e+09	1.17019e+09	1.17022e+09	1.17563e+09
M426T268	426.358	268.151	Oleoyl-l-carnitine	[M+H]+	HMDB0005065		Lipids and lipid-like molecules	Fatty Acyls	Fatty acid esters	4.83518e+07	6.98416e+07	7.07496e+07	2.72164e+07	2.97605e+07	1.727e+07	7.16886e+07	9.59413e+07	5.68478e+06	1.46395e+07	3.12583e+07	1.39951e+07	4.27626e+07	4.25746e+07	4.20264e+07
M461T289_2	461.349	288.718	Oligomycin b	[M+H-C17H28O7]+		C11312				226014	287433	182733	139733	601172	294685	789741	754787	949312	1.72124e+06	1.27826e+06	915833	722530	722253	683721
M298T373	298.151	373.067	Oxycodone	[M+H-H2O]+	HMDB0014640	C08018				7.47146e+06	1.11024e+07	9.59476e+06	9.9506e+06	7.73033e+06	1.10509e+07	6.17974e+07	7.2523e+07	5.05943e+06	2.82186e+06	4.76528e+07	2.17034e+06	9.86261e+06	1.02691e+07	1.02808e+07
M256T902	256.263	901.929	Palmitamide	[M+H]+	HMDB0012273		Lipids and lipid-like molecules	Fatty Acyls	Fatty amides	7.49323e+07	5.69639e+07	4.3558e+07	6.93977e+07	4.27621e+07	4.14036e+07	4.77239e+07	8.74717e+06	6.01652e+07	4.24515e+07	4.2654e+07	1.28312e+07	4.59385e+07	4.02692e+07	3.94241e+07
M704T270_1	703.576	269.563	Palmitoyl sphingomyelin	[M+H]+	HMDB0061712		Lipids and lipid-like molecules	Sphingolipids	Phosphosphingolipids	7.83169e+08	4.30065e+08	7.42698e+08	6.78744e+08	7.55804e+08	5.52779e+08	8.46932e+08	1.49584e+09	2.85312e+08	3.24294e+08	4.90011e+08	3.22663e+08	6.37987e+08	6.2928e+08	6.29207e+08
M220T363	220.118	363.003	Pantothenate	(M+H)+	HMDB0000210	C00864	Organic oxygen compounds	Organooxygen compounds	Alcohols and polyols	2.00073e+06	1.19447e+06	3.63211e+06	1.18362e+06	2.26424e+06	3.05705e+06	1.13548e+06	276878	5.29181e+06	1.80492e+06	4.76351e+06	1.0693e+06	2.1892e+06	2.26565e+06	2.18934e+06
M340T355_1	340.161	355.378	Papaverine	[M+H]+	HMDB0015245	C06533	Organoheterocyclic compounds	Isoquinolines and derivatives	Benzylisoquinolines	5.17572e+06	7.38454e+06	7.61177e+06	9.48898e+06	780124	1.50992e+06	3.81173e+06	7.51812e+06	4.31918e+06	4.2207e+06	2.03921e+06	4.4535e+06	5.2356e+06	5.42086e+06	5.42046e+06
M160T392_1	160.097	391.539	Pargyline	[M+H]+	HMDB0015563	C07414	Benzenoids	Benzene and substituted derivatives	Phenylmethylamines	4.75098e+06	2.44176e+06	2.04791e+06	1.52459e+06	3.51763e+06	4.46404e+06	1.61115e+06	6.77075e+07	1.44484e+08	1.90695e+06	4.71437e+07	4.48e+07	1.78008e+06	1.80673e+06	1.80666e+06
M757T256	756.554	255.867	PC(16:0/16:0)	(M+Na)+	HMDB0000564/HMDB0007878/HMDB0007879/HMDB0007880/HMDB0007882/HMDB0007884/HMDB0007886/HMDB0007887/HMDB0007897/HMDB0007898/HMDB0007911/HMDB0007912/HMDB0007913/HMDB0007914/HMDB0007936/HMDB0007937/HMDB0007938/HMDB0007939/HMDB0007940/HMDB0007958/HMDB0007959/HMDB0007960/HMDB0007961/HMDB0007964/HMDB0007966/HMDB0007967/HMDB0007981/HMDB0007982/HMDB0007983/HMDB0007984/HMDB0007985/HMDB0008002/HMDB0008003/HMD…	C00157	Lipids and lipid-like molecules	Glycerophospholipids	Glycerophosphocholines	1.58293e+07	1.56328e+07	2.02835e+07	3.22008e+07	4.31012e+07	6.56492e+07	5.76167e+07	2.58493e+07	1.69202e+07	1.05691e+08	5.41474e+07	3.86984e+07	4.20891e+07	4.59485e+07	4.58202e+07
M125T231_2	125.071	230.784	Penicillic acid	[M+H-CH2O2]+		C19495	Organic acids and derivatives	Keto acids and derivatives	Medium-chain keto acids and derivatives	6.89196e+08	1.89429e+08	7.04436e+08	6.28245e+08	7.23306e+08	4.03627e+08	1.10683e+09	8.34167e+08	4.98271e+08	3.01602e+08	6.07927e+08	4.12216e+08	6.05152e+08	6.42249e+08	6.06615e+08
M239T113	239.149	113.31	Pentaethylene glycol	[M+H]+			Organic oxygen compounds	Organooxygen compounds	Ethers	1.23983e+07	1.29144e+07	6.03672e+06	5.23192e+06	1.59386e+07	1.04061e+07	7.02939e+06	1.21848e+07	1.91483e+07	1.53148e+07	9.77209e+06	5.54594e+06	7.84123e+06	7.1395e+06	7.10596e+06
M341T417	341.182	417.199	Pentamidine	[M+H]+	HMDB0014876	C07420				1.76582e+06	2.98496e+06	2.66897e+06	3.18291e+06	4.66453e+06	3.6372e+06	6.67371e+06	8.78646e+06	3.70354e+06	1.47845e+06	2.49312e+06	1.33198e+06	3.64157e+06	3.6414e+06	3.66394e+06
M309T65	309.227	64.6141	Pentapropylene glycol	[M+H]+			Organic oxygen compounds	Organooxygen compounds	Alcohols and polyols	1.51889e+07	1.01902e+07	1.85999e+07	1.02355e+07	1.02743e+07	1.46108e+07	1.52965e+07	1.31374e+07	3.00349e+07	1.54398e+07	1.63225e+07	1.09349e+07	1.16595e+07	1.16614e+07	1.13457e+07
M269T354	269.125	353.565	Pentostatin	[M+H]+	HMDB0014692	C02267				3.46188e+07	5.13475e+07	7.24154e+07	5.7824e+07	3.64875e+07	2.87323e+07	5.00303e+07	6.91952e+07	6.04377e+07	3.42081e+07	4.51265e+07	4.68181e+07	5.21343e+07	5.43839e+07	5.20788e+07
M279T408	279.146	407.785	Pentoxifylline	[M+H]+	HMDB0014944	C07424	Organoheterocyclic compounds	Imidazopyrimidines	Purines and purine derivatives	3.3482e+07	3.34344e+07	3.50489e+07	3.10995e+07	4.70805e+07	3.30103e+07	5.13102e+07	4.77196e+07	2.43937e+07	2.25706e+07	3.93375e+07	1.93498e+07	3.35008e+07	3.31445e+07	3.31393e+07
M369T563	369.249	562.71	Perindopril	[M+H]+	HMDB0014928	C07706	Organic acids and derivatives	Carboxylic acids and derivatives	Amino acids, peptides, and analogues	2.12184e+06	3.29818e+06	6.97719e+06	2.64454e+06	2.66384e+06	4.61046e+06	1.26831e+06	1.55365e+06	5.07472e+06	2.0682e+06	8.97345e+06	2.92918e+06	3.83024e+06	3.83024e+06	3.72168e+06
M223T308	223.094	307.514	Phe-gly	[M+H]+		C18481	Organic acids and derivatives	Carboxylic acids and derivatives	Amino acids, peptides, and analogues	111245	311792	630642	288068	1.36801e+06	825152	575487	502383	342114	362051	328779	314327	138181	146005	148106
M180T404	180.077	403.993	Phenacetin	[M+H]+		C07591	Benzenoids	Benzene and substituted derivatives	Anilides	1.31199e+07	1.79042e+07	1.46444e+07	1.36112e+07	730122	1.1163e+07	4.72506e+06	8.33902e+06	2.50957e+07	2.38298e+07	1.37276e+07	1.75029e+07	1.3303e+07	1.30798e+07	1.33105e+07
M166T328_1	166.086	327.55	Phenylalanine	[M+H]+	HMDB0000159	C00079	Organic acids and derivatives	Carboxylic acids and derivatives	Amino acids, peptides, and analogues	1.05972e+08	7.84962e+07	8.62384e+07	5.73362e+07	6.82825e+07	4.48617e+07	1.11009e+08	1.36169e+08	3.50756e+07	5.93029e+07	5.35298e+07	3.55625e+07	7.07367e+07	7.10069e+07	7.10074e+07
M150T2_3	150.103	2.06932	Phenylephrine	[M+H-H2O]+	HMDB0002182	C07441	Benzenoids	Phenols	1-hydroxy-4-unsubstituted benzenoids	3.53452e+06	4.26599e+06	3.77181e+06	2.71706e+06	4.23894e+06	4.19513e+06	3.58357e+06	4.04154e+06	3.4029e+06	4.55797e+06	25310.2	4.4843e+06	3.456e+06	3.76536e+06	3.81352e+06
M367T419	367.139	419.169	Phosphocholine	[2M+H]+	HMDB0001565	C00588	Organic nitrogen compounds	Organonitrogen compounds	Quaternary ammonium salts	81924	44842.2	13766.9	58805.7	741804	125841	5.49348e+06	2.65327e+06	132672	20444.4	110911	11293.1	264057	303185	305261
M279T240	279.159	239.921	Phthalic acid Mono-2-ethylhexyl Ester	(M+H)+						1.22532e+06	989748	967470	1.09875e+06	1.01535e+06	1.67301e+06	1.38816e+06	846265	820950	1.42208e+06	937322	966705	1.01915e+06	1.02221e+06	1.10311e+06
M318T209_2	318.3	209.462	Phytosphingosine	[M+H]+	HMDB0004610	C12144	Organic nitrogen compounds	Organonitrogen compounds	Amines	9.7288e+07	6.26081e+07	1.40556e+08	6.52987e+07	4.6129e+07	9.48606e+07	5.23581e+07	5.74376e+07	7.7146e+07	5.46876e+07	5.4701e+07	6.25241e+07	5.42717e+08	5.44971e+08	5.44988e+08
M143T235	143.082	234.607	Pimelic acid	[M+H-H2O]+	HMDB0000857	C02656	Lipids and lipid-like molecules	Fatty Acyls	Fatty acids and conjugates	3.1481e+07	4.24053e+07	3.61973e+07	3.79565e+07	4.0221e+07	3.42025e+07	5.03009e+07	5.76446e+07	3.21075e+07	2.24496e+07	3.04733e+07	2.09792e+07	3.669e+07	3.79369e+07	3.79434e+07
M260T522_2	260.197	521.754	Primaquine	[M+H]+	HMDB0015219	C07627	Organoheterocyclic compounds	Quinolines and derivatives	Aminoquinolines and derivatives	9.0468e+07	6.47885e+07	7.45377e+07	8.38846e+07	5.19446e+06	3.26529e+07	2.22154e+06	1.03152e+07	7.35795e+07	7.104e+07	3.78415e+07	5.67809e+07	5.36275e+07	5.36238e+07	5.50013e+07
M354T291	354.227	291.412	Proadifen	[M+H]+			Benzenoids	Benzene and substituted derivatives	Diphenylmethanes	39952.6	13708.7	569339	925259	3.58356e+06	1.63303e+06	964068	351748	482308	14504.8	8398.49	482308	516850	538595	538596
M187T365	187.108	364.508	Pro-Ala	[M+H]+			Organic acids and derivatives	Carboxylic acids and derivatives	Amino acids, peptides, and analogues	6.24572e+06	5.19027e+06	4.00324e+06	3.45592e+06	2.88631e+06	2.43022e+06	1.44769e+07	1.85586e+07	3.0232e+06	2.5985e+06	3.78206e+06	2.38699e+06	5.45727e+06	5.6006e+06	5.60114e+06
M244T372	244.129	371.662	Pro-gln	[M+H]+			Organic acids and derivatives	Carboxylic acids and derivatives	Amino acids, peptides, and analogues	787321	726273	494848	444822	504756	366856	2.97735e+06	6.42662e+06	721834	362769	1.18355e+06	431979	957789	961004	994506
M401T395	401.214	394.562	Pro-Glu-Arg	[M+H]+			Organic acids and derivatives	Carboxylic acids and derivatives	Amino acids, peptides, and analogues	2.54791e+07	3.76533e+07	3.23232e+07	3.23948e+07	3.21463e+07	3.26633e+07	5.84115e+06	5.86232e+06	3.4169e+07	3.44507e+07	4.83975e+07	3.17564e+07	2.31587e+07	2.3165e+07	2.25975e+07
M229T385_3	229.155	385.017	Pro-leu	[M+H]+			Organic acids and derivatives	Carboxylic acids and derivatives	Amino acids, peptides, and analogues	1.41338e+09	6.42536e+08	1.54577e+09	6.28e+08	2.13627e+09	1.19529e+09	1.98858e+09	1.20751e+09	8.84413e+08	7.50953e+08	9.70728e+08	3.72761e+08	1.18584e+09	1.18618e+09	1.1521e+09
M218T241	218.212	240.78	Prolintane	[M+H]+						7.17941e+06	3.50236e+06	5.15131e+06	9.31583e+06	3.42215e+06	4.58972e+06	5.64415e+06	7.56883e+06	4.33469e+06	3.69514e+06	6.93738e+06	5.9789e+06	1.15546e+07	1.15577e+07	1.22223e+07
M175T899	174.973	898.639	Pronamide	[M+H-C5H9N+2i]+		C14333	Benzenoids	Benzene and substituted derivatives	Benzoic acids and derivatives	1.48882e+07	1.28655e+07	2.1883e+07	1.00456e+07	1.17529e+07	1.43883e+07	1.04223e+07	1.30797e+07	1.28124e+07	1.58845e+07	1.28058e+07	1.41639e+07	8.47131e+06	6.6902e+06	8.84933e+06
M203T356_1	203.102	355.926	Pro-ser	[M+H]+			Organic acids and derivatives	Carboxylic acids and derivatives	Amino acids, peptides, and analogues	1.44339e+06	1.17101e+07	716377	927491	1.89196e+06	5.05959e+06	2.2494e+06	1.57829e+06	1.06651e+06	877105	1.42035e+06	9.59337e+06	1.27237e+06	1.21672e+06	1.27259e+06
M217T361_1	217.118	360.82	Pro-thr	[M+H]+			Organic acids and derivatives	Carboxylic acids and derivatives	Amino acids, peptides, and analogues	2.47434e+06	1.75305e+06	1.27569e+06	1.05669e+06	579530	742660	7.34667e+06	1.04193e+07	890791	889084	963561	936647	2.53707e+06	2.53692e+06	2.50374e+06
M302T184	302.305	184.277	Pro-Trp	[M+H]+	HMDB0000269	C00836	Organic nitrogen compounds	Organonitrogen compounds	Amines	3.4506e+07	4.57396e+06	2.9669e+07	1.43728e+07	8.57398e+06	3.24439e+06	7.70432e+06	1.70148e+07	8.44459e+06	5.04569e+06	1.48963e+07	2.69314e+07	7.32095e+07	7.31105e+07	7.53758e+07
M112T165	112.087	165.119	Pseudopelletierine	[M+H-C2H2O]+	HMDB0034580	C10865	Organoheterocyclic compounds	Piperidines	Piperidinones	9.79275e+06	1.92881e+07	1.43372e+07	1.09728e+07	1.63e+07	1.16481e+07	1.08294e+07	9.73296e+06	1.59261e+07	1.28938e+07	1.06487e+07	1.16736e+07	9.34982e+06	1.10776e+07	9.24354e+06
M282T265	282.279	265.377	Psychosine	[M+H-C6H12O6]+	HMDB0000648	C01747	Lipids and lipid-like molecules	Sphingolipids	Glycosphingolipids	6.68305e+07	3.7644e+07	2.64848e+07	7.48789e+07	5.34038e+07	6.04919e+07	3.74787e+07	3.02032e+07	2.78829e+07	2.8322e+07	8.10484e+07	1.00754e+08	3.45539e+07	3.78499e+07	3.4548e+07
M80T128	80.0501	128.492	Pyridine	[M+H]+	HMDB0000926	C00747				7.24774e+07	4.69401e+07	6.46436e+07	8.91647e+07	6.59411e+07	5.55273e+07	1.124e+08	7.90872e+07	9.4832e+06	3.55505e+07	5.13112e+07	3.36387e+07	6.955e+07	6.99048e+07	7.71017e+07
M169T330_2	169.108	330.179	Pyridoxamine	[M+H]+	HMDB0001431	C00534	Organoheterocyclic compounds	Pyridines and derivatives	Pyridoxamines	2.24607e+08	2.08037e+08	1.77592e+08	1.97864e+08	2.0966e+08	1.8498e+08	2.63724e+08	2.85606e+08	1.34981e+08	1.66676e+08	1.5432e+08	2.17674e+08	2.0449e+08	2.02118e+08	2.02073e+08
M212T332	212.122	331.968	(-)-quebrachitol	[M+NH4]+	HMDB0034221	C08257	Organic oxygen compounds	Organooxygen compounds	Alcohols and polyols	6.60487e+06	6.3961e+06	6.2828e+06	5.66003e+06	8.13316e+06	5.33569e+06	1.09843e+07	1.31603e+07	3.7282e+06	3.92203e+06	5.57232e+06	4.17657e+06	5.76995e+06	5.85084e+06	5.8508e+06
M317T438_1	317.041	437.792	Quercetin 3'-methyl ether	[M+H]+	HMDB0002655	C10084	Phenylpropanoids and polyketides	Flavonoids	Flavones	2.63278e+07	2.59941e+07	2.97451e+07	2.63524e+07	3.74332e+07	2.22644e+07	3.70463e+07	2.10527e+07	2.20441e+07	2.02694e+07	3.46792e+07	1.01229e+07	2.70507e+07	2.7269e+07	2.7049e+07
M146T85	146.06	84.5055	Quinolin-2-ol	[M+H]+		C06415	Organoheterocyclic compounds	Quinolines and derivatives	Quinolones and derivatives	8.19693e+06	8.60302e+06	1.41078e+07	9.29881e+06	3.85189e+06	5.52696e+06	4.62774e+06	5.99986e+06	1.24688e+06	2.44194e+06	2.39947e+06	1.12253e+06	6.43351e+06	4.99457e+06	5.74595e+06
M362T222	362.326	222.074	(r)-(+)-arachidonyl-1'-hydroxy-2'-propylamide	[M+H]+			Lipids and lipid-like molecules	Fatty Acyls	Fatty amides	1.51986e+07	9.25405e+06	1.10052e+07	3.45201e+06	6.88269e+06	6.20083e+06	3.52192e+06	3.53005e+06	4.73488e+06	7.37249e+06	3.40048e+06	1.36803e+07	4.85592e+07	4.87811e+07	5.94589e+07
M377T467	377.149	466.61	Riboflavin	[M+H]+	HMDB0000244	C00255	Organoheterocyclic compounds	Pteridines and derivatives	Alloxazines and isoalloxazines	230776	205389	101814	104038	5.09307e+06	1.99944e+06	5.21165e+06	4.70677e+06	64226.6	239686	240948	184724	1.47259e+06	1.39566e+06	1.38652e+06
M356T489	356.193	489.341	Rotundine	[M+H]+		C02890				358513	82171.5	263917	35716.2	2.95773e+06	1.43241e+06	1.72105e+06	801446	87481	85661	159794	48142.1	637021	637023	632731
M399T430	399.145	429.967	S-adenosylmethionine	[M+H]+	HMDB0001185	C00019	Nucleosides, nucleotides, and analogues	5'-deoxyribonucleosides	5'-deoxy-5'-thionucleosides	1.24449e+06	8.22319e+06	5.60932e+06	5.14819e+06	5.69083e+06	7.25358e+06	8.51118e+06	9.87997e+06	4.40488e+06	3.41176e+06	4.73354e+06	1.48558e+06	4.55958e+06	5.69405e+06	5.67034e+06
M315T372	315.166	372.139	Safranin	[M]+		C19919	Organoheterocyclic compounds	Diazanaphthalenes	Benzodiazines	358921	578923	406822	451553	466778	476650	1.86303e+06	3.3832e+06	246908	130264	1.88272e+06	134379	502666	520697	504054
M386T362_1	386.124	361.863	Sarafloxacin	[M+H]+	HMDB0039526		Organoheterocyclic compounds	Quinolines and derivatives	Phenylquinolines	6.04928e+06	7.16931e+06	8.12305e+06	9.74667e+06	7.5634e+06	6.98553e+06	4.76567e+06	2.58965e+06	9.30736e+06	6.03246e+06	9.22688e+06	8.44548e+06	7.62797e+06	7.93565e+06	7.63841e+06
M138T2_3	138.103	2.04804	Scopolamine	[M+H-C9H10O3]+	HMDB0003573	C01851	Organic acids and derivatives	Hydroxy acids and derivatives	Beta hydroxy acids and derivatives	8.57126e+06	1.0666e+07	1.18371e+07	8.87238e+06	1.11319e+07	8.92732e+06	9.58151e+06	8.59358e+06	9.09669e+06	9.94132e+06	8.86859e+06	8.34839e+06	7.9818e+06	8.72195e+06	8.79819e+06
M193T232	193.072	232.44	Scopoletin	[M+H]+	HMDB0034344	C01752	Phenylpropanoids and polyketides	Coumarins and derivatives	Hydroxycoumarins	9.20782e+06	1.08701e+07	9.81251e+06	1.06366e+07	1.67232e+06	8.43907e+06	3.41649e+06	2.31521e+06	1.05213e+07	1.20477e+07	6.61846e+06	7.4221e+06	7.83765e+06	7.95195e+06	7.83709e+06
M139T149	139.123	149.274	Sebacic acid	[M+H-CH4O3]+	HMDB0000792	C08277	Lipids and lipid-like molecules	Fatty Acyls	Fatty acids and conjugates	1.03861e+07	1.0527e+07	2.81212e+07	1.20451e+07	1.34e+07	1.08387e+07	1.13811e+07	1.07886e+07	1.04665e+07	1.08666e+07	1.10703e+07	1.00671e+07	1.06263e+07	9.66668e+06	1.06387e+07
M327T418	327.166	417.714	(-)-secoisolariciresinol	[M+H-2H2O]+	HMDB0013692	C18167	Lignans, neolignans and related compounds	Dibenzylbutane lignans	Dibenzylbutanediol lignans	1.36128e+06	1.86872e+06	2.24585e+06	1.93023e+06	5.56773e+06	2.61692e+06	5.73658e+06	5.39979e+06	6.67829e+06	3.24139e+06	3.74232e+06	1.92233e+06	3.60382e+06	3.59318e+06	3.65874e+06
M175T326	175.071	325.616	Sedoheptulosan	[M+H-H2O]+						1.25107e+07	1.17583e+07	1.07175e+07	1.12051e+07	1.20759e+07	1.02382e+07	6.18055e+06	1.4872e+06	1.21137e+07	8.99524e+06	1.32687e+07	6.32085e+06	9.40643e+06	9.51364e+06	9.40676e+06
M225T287	225.098	287.247	Ser-His	(M+H-H2O)+						2.99244e+06	2.8912e+06	3.0088e+06	2.97869e+06	2.61998e+06	3.51092e+06	4.15456e+06	5.74562e+06	2.17156e+06	1.86944e+06	3.16271e+06	2.62202e+06	3.15236e+06	2.95995e+06	3.14378e+06
M347T526	347.229	526.375	Ser-Leu-Lys	[M+H]+			Organic acids and derivatives	Carboxylic acids and derivatives	Amino acids, peptides, and analogues	1.04834e+06	1.46903e+06	2.18079e+06	3.88981e+06	4.8911e+06	1.30269e+06	6.78303e+06	2.84858e+06	2.05726e+06	1.36906e+06	2.0241e+06	2.50231e+06	2.71131e+06	2.62954e+06	3.03085e+06
M298T263	298.097	263.127	S-methyl-5'-thioadenosine	[M+H]+	HMDB0001173	C00170	Nucleosides, nucleotides, and analogues	5'-deoxyribonucleosides	5'-deoxy-5'-thionucleosides	8.49569e+06	1.84651e+07	1.21877e+07	9.82182e+06	1.57346e+07	9.26352e+06	1.50331e+07	1.00641e+07	1.12747e+07	5.73782e+06	1.07574e+07	3.04395e+06	1.07559e+07	1.07562e+07	1.04269e+07
M203T351	203.223	350.981	Spermine	[M+H]+	HMDB0001256	C00750	Organic nitrogen compounds	Organonitrogen compounds	Amines	3.0139e+06	4.61095e+06	3.59832e+06	3.66308e+06	2.07947e+06	6.44298e+06	7.8429e+06	5.06276e+06	2.8605e+06	3.1597e+06	3.62076e+06	3.83195e+06	3.576e+06	3.60102e+06	3.76582e+06
M770T165	769.558	164.589	Sphingomyelin (d18:1/18:0)	(M+K)+	HMDB0001348/HMDB0010168/HMDB0010169/HMDB0011698/HMDB0011699/HMDB0012084/HMDB0012085/HMDB0012087/HMDB0012088/HMDB0012089/HMDB0012090/HMDB0012091/HMDB0012092/HMDB0012093/HMDB0012094/HMDB0012095/HMDB0012096/HMDB0012100/HMDB0012101/HMDB0012102/HMDB0012103/HMDB0012104/HMDB0012105/HMDB0012107/HMDB0013461/HMDB0013462/HMDB0013463/HMDB0013464/HMDB0013465/HMDB0013466/HMDB0013467/HMDB0013468/HMDB0013469	C00550	Lipids and lipid-like molecules	Sphingolipids	Phosphosphingolipids	1.35804e+06	1.59101e+06	5.17061e+06	1.411e+06	994040	1.36951e+06	1.40664e+06	2.75165e+06	1.02585e+06	1.63568e+06	2.74799e+06	1.77068e+06	1.55532e+06	1.6879e+06	2.12875e+06
M300T259	300.29	258.971	Sphingosine	[M+H]+	HMDB0000252	C00319	Organic nitrogen compounds	Organonitrogen compounds	Amines	3.61271e+06	2.69022e+06	4.90984e+06	3.57572e+06	2.85493e+06	2.45545e+06	1.00556e+07	1.12325e+07	4.3497e+06	3.8756e+06	3.25829e+06	2.40811e+06	4.30162e+06	4.30869e+06	3.901e+06
M144T344	144.102	344.061	Stachydrine	[M+H]+	HMDB0004827	C10172	Organic acids and derivatives	Carboxylic acids and derivatives	Amino acids, peptides, and analogues	7.51091e+07	7.59917e+07	9.50804e+07	8.62409e+07	4.8239e+07	4.09518e+07	6.23768e+07	3.95699e+07	1.19891e+08	5.68909e+07	2.25726e+07	4.9747e+07	6.77664e+07	6.70778e+07	6.73412e+07
M428T268	428.374	267.623	Stearoylcarnitine	[M+H]+	HMDB0000848		Lipids and lipid-like molecules	Fatty Acyls	Fatty acid esters	8.27411e+07	6.74693e+07	8.35877e+07	2.65354e+07	2.2932e+07	1.3212e+07	6.19099e+07	2.5484e+08	3.01618e+06	3.37333e+06	7.42744e+06	7.66206e+06	5.34724e+07	5.25985e+07	5.23713e+07
M111T2_3	111.092	2.04804	Suberic acid	[M+H-CH4O3]+	HMDB0000893	C08278	Lipids and lipid-like molecules	Fatty Acyls	Fatty acids and conjugates	1.97304e+07	1.68194e+07	1.92834e+07	1.60189e+07	1.75258e+07	1.77084e+07	1.71662e+07	2.06172e+07	9.30611e+06	1.93194e+07	2.17364e+07	2.13539e+07	1.48764e+07	1.46446e+07	1.60473e+07
M103T380	103.039	380.249	Succinic semialdehyde	[M+H]+	HMDB0001259	C00232	Lipids and lipid-like molecules	Fatty Acyls	Fatty acids and conjugates	2.49243e+06	2.32244e+06	3.78507e+06	1.6885e+06	6.99646e+06	4.33116e+06	6.87814e+06	2.99557e+06	2.80348e+06	3.40965e+06	2.58275e+06	1.30601e+06	3.47185e+06	3.44766e+06	3.38526e+06
M281T875	281.048	874.805	Sulfameter	[M+H]+			Benzenoids	Benzene and substituted derivatives	Benzenesulfonamides	1.11338e+07	1.87858e+07	2.1783e+07	1.12679e+07	1.67451e+07	1.38318e+07	1.59195e+07	1.05327e+07	2.17948e+07	1.35627e+07	1.52052e+07	1.48491e+07	1.08335e+07	1.15302e+07	1.08466e+07
M270T362	270.06	362.494	Tenofovir	[M+H-H2O]+	HMDB0014445	C17407	Organoheterocyclic compounds	Imidazopyrimidines	Purines and purine derivatives	8.90774e+06	1.00808e+07	9.76241e+06	1.21002e+07	9.05075e+06	1.13271e+07	3.55888e+06	1.86752e+06	1.02751e+07	8.01635e+06	9.23806e+06	8.53259e+06	8.91307e+06	8.91575e+06	9.25988e+06
M313T59_1	313.274	58.7262	Teprenone	[M+H-H2O]+		C13297	Lipids and lipid-like molecules	Prenol lipids	Diterpenoids	1.08417e+07	1.35778e+07	1.33941e+07	9.03426e+06	1.3188e+07	8.65938e+06	1.22771e+07	1.43019e+07	8.61285e+06	9.93117e+06	1.54476e+07	1.29764e+07	1.22978e+07	1.2456e+07	1.24559e+07
M195T109	195.123	108.677	Tetraethylene glycol	[M+H]+	HMDB0094708		Organic oxygen compounds	Organooxygen compounds	Ethers	5.02783e+07	4.95815e+07	2.70232e+07	3.93433e+07	5.34612e+07	5.60378e+07	3.808e+07	4.6106e+07	4.95436e+07	3.84111e+07	4.55756e+07	5.22756e+07	4.91792e+07	4.91076e+07	4.73684e+07
M209T85	209.138	84.5707	Tetraethylene glycol monomethyl ether	[M+H]+	HMDB0062236		Organic oxygen compounds	Organooxygen compounds	Ethers	8.14635e+07	5.6768e+07	9.86225e+07	2.23416e+07	1.08272e+08	8.32277e+07	6.32336e+07	6.24381e+07	7.35569e+07	5.23019e+07	4.87706e+07	1.19921e+08	6.33263e+07	6.5235e+07	6.52043e+07
M223T67	223.154	66.8844	Tetraglyme	[M+H]+			Organic oxygen compounds	Organooxygen compounds	Ethers	6.01089e+07	4.41476e+07	4.26498e+07	2.1434e+07	4.53818e+07	5.6089e+07	4.66797e+07	4.57567e+07	4.82193e+07	3.87264e+07	4.31396e+07	5.23415e+07	4.64543e+07	4.64534e+07	4.59802e+07
M265T464	265.111	463.825	Thiamine	[M]+	HMDB0000235	C00378	Organoheterocyclic compounds	Diazines	Pyrimidines and pyrimidine derivatives	53244.7	3.66446e+06	4.2887e+06	2.8738e+06	856576	2.85411e+06	3.90272e+06	1.87063e+06	6.4945e+06	5.80952e+06	3.83857e+06	3.61469e+06	3.36389e+06	2.98232e+06	2.9807e+06
M122T2	122.072	2.04727	Thiamine monophosphate	[M+H-C6H10SO4NP]+	HMDB0002666	C01081	Organoheterocyclic compounds	Diazines	Pyrimidines and pyrimidine derivatives	1.58195e+07	1.66785e+07	1.71278e+07	1.10548e+07	1.96611e+07	1.34962e+07	1.44756e+07	1.75267e+07	1.48741e+07	1.71616e+07	1.89222e+07	1.55184e+07	2.32099e+07	1.82195e+07	1.76765e+07
M781T251	780.553	250.906	Thioetheramide-PC	(M-H+2Na)+						3.29183e+07	1.84368e+07	2.79782e+07	4.31484e+07	1.01275e+08	1.0552e+08	4.78904e+07	5.7466e+07	6.75119e+07	1.40028e+08	8.02405e+07	9.75925e+07	5.81396e+07	6.50942e+07	6.46736e+07
M267T401	267.145	401.486	Thr-Phe	[M+H]+			Organic acids and derivatives	Carboxylic acids and derivatives	Amino acids, peptides, and analogues	2.18904e+07	1.45304e+07	2.12535e+07	1.86195e+07	2.21343e+07	2.069e+07	2.80529e+07	2.61177e+07	1.16463e+07	1.22144e+07	2.15256e+07	1.71993e+07	2.09191e+07	2.09227e+07	2.23149e+07
M264T453	264.086	452.761	Ticlopidine	[M+H]+	HMDB0014353	C07140				1.44195e+07	1.58775e+07	1.38752e+07	1.32086e+07	7.75568e+06	9.63171e+06	8.61785e+06	7.72946e+06	1.62924e+07	1.59072e+07	1.1887e+07	1.04446e+07	1.17172e+07	1.1716e+07	1.15548e+07
M246T544_2	246.181	544.355	Tramadol	[M+H-H2O]+	HMDB0014339	C07153	Benzenoids	Phenol ethers	Anisoles	4.71337e+07	1.43914e+08	1.05254e+08	6.75745e+07	4.24038e+07	3.53686e+07	1.47268e+08	2.1341e+08	1.00851e+08	1.23591e+08	8.55334e+07	4.97939e+07	1.03151e+08	1.03115e+08	1.04578e+08
M291T64	291.243	64.2011	Trans-androsterone	[M+H]+		C07635	Lipids and lipid-like molecules	Steroids and steroid derivatives	Androstane steroids	1.65337e+07	1.47708e+07	2.01121e+06	1.57227e+07	3.03968e+07	3.72286e+06	1.83534e+07	1.88871e+07	1.46406e+07	1.31081e+07	1.41016e+07	1.79637e+07	1.50191e+07	1.502e+07	1.51494e+07
M149T2_1	149.082	2.05542	trans-cinnamate	[M+H]+	HMDB0000930	C10438	Phenylpropanoids and polyketides	Cinnamic acids and derivatives	Cinnamic acids	5.18119e+06	6.7126e+06	5.74043e+06	6.78515e+06	7.85674e+06	5.508e+06	6.73612e+06	5.38554e+06	7.16465e+06	6.52238e+06	7.20776e+06	5.8091e+06	4.95682e+06	5.20618e+06	4.94705e+06
M211T507	211.156	506.6	Trans-traumatic acid	[M+H-H2O]+	HMDB0000933	C16308	Lipids and lipid-like molecules	Fatty Acyls	Fatty acids and conjugates	3.57283e+06	3.26093e+06	4.44899e+06	4.15254e+06	5.51614e+06	4.96889e+06	8.28473e+06	8.69918e+06	4.37409e+06	4.48729e+06	6.46939e+06	3.23609e+06	4.74356e+06	4.74924e+06	4.74352e+06
M136T392	136.062	392.16	Trans-zeatin	[M+H-C5H8O]+	HMDB0012204	C00371	Organoheterocyclic compounds	Imidazopyrimidines	Purines and purine derivatives	5.60182e+06	7.87191e+06	1.19448e+07	1.03812e+07	1.6815e+07	1.01412e+07	1.1609e+07	1.21306e+07	7.06215e+06	8.56176e+06	1.27821e+07	7.99859e+06	9.53751e+06	1.04256e+07	9.50582e+06
M267T57_1	267.172	57.192	Tributyl phosphate	[M+H]+		C14439	Organic acids and derivatives	Organic phosphoric acids and derivatives	Phosphate esters	4.43988e+06	3.47579e+06	3.66946e+06	3.11532e+06	1.52433e+06	4.01457e+06	2.84335e+06	2.44742e+06	2.58196e+06	1.71015e+06	3.79965e+06	3.33526e+06	3.03504e+06	3.14504e+06	3.14515e+06
M432T466	432.191	465.627	Tricyclo[3.3.1.1(3,7)]decane-1-carboxamide, n-[2-(benzoylamino)-6-benzothiazolyl]-	[M+H]+						44183.7	22491.2	31480	65002.1	37727	29314.4	25261.2	56386.3	1.54458e+06	2.10622e+06	59628.3	78660.7	216435	192816	193589
M156T345	156.042	345.026	Triflumuron	[M+H-C8H4F3O2N]+		C18615	Benzenoids	Benzene and substituted derivatives	N-phenylureas	2.16919e+07	2.83635e+07	2.61072e+07	1.88952e+07	2.25742e+07	2.70614e+07	2.06874e+07	2.41246e+07	2.18372e+07	2.13839e+07	3.08086e+07	1.90701e+07	2.18231e+07	2.17346e+07	2.19582e+07
M138T352	138.055	351.964	Trigonelline	[M+H]+	HMDB0000875	C01004	Alkaloids and derivatives			5.70181e+06	6.32065e+06	1.39994e+07	1.0347e+07	1.00081e+07	1.57358e+07	1.32466e+07	1.29982e+07	1.5216e+06	1.21573e+06	2.99109e+06	1.27345e+06	8.26429e+06	8.53488e+06	8.13402e+06
M76T372	76.0764	372.224	Trimethylamine n-oxide	[M+H]+	HMDB0000925	C01104	Organic nitrogen compounds	Organonitrogen compounds	Aminoxides	1.30333e+07	1.51009e+07	6.78245e+06	2.02039e+07	9.26466e+06	8.45633e+06	1.69767e+07	1.92583e+07	9.41789e+06	1.01568e+07	1.51756e+07	4.62046e+06	1.23479e+07	1.27921e+07	1.23446e+07
M275T365	275.1	364.947	Trinexapac-ethyl	[M+Na]+		C18541				4.71431e+06	3.35007e+06	3.46547e+06	6.25819e+06	997064	4.30041e+06	942557	922479	5.51145e+06	4.50238e+06	9.58629e+06	5.12321e+06	3.85128e+06	4.0026e+06	4.00231e+06
M122T900_1	122.081	900.15	Tris(hydroxymethyl)aminomethane	[M+H]+	HMDB0240288	C07182	Organic nitrogen compounds	Organonitrogen compounds	Amines	1.4662e+08	2.08424e+08	2.7477e+08	2.57608e+08	1.1168e+08	1.10911e+08	2.00446e+08	2.96067e+08	2.68455e+08	2.51741e+08	1.59931e+08	1.88543e+08	2.36555e+08	2.47891e+08	1.21277e+08
M140T56	140.118	55.7535	Tropinone	[M+H]+		C00783				1.50925e+06	5.89793e+06	555376	1.43232e+06	4.12378e+06	2.87683e+06	392676	1.31265e+06	3.87316e+06	2.83212e+06	2.22414e+06	3.94107e+06	2.14992e+06	1.85274e+06	1.47609e+06
M247T296	247.144	295.683	Tryptophan betaine	[M+H]+	HMDB0061115	C09213	Organic acids and derivatives	Carboxylic acids and derivatives	Amino acids, peptides, and analogues	1.26947e+06	1.20776e+06	7.41056e+06	477496	2.9399e+07	2.12673e+07	3.53756e+07	1.60751e+07	175191	220810	1.24281e+06	541224	8.04185e+06	8.04184e+06	8.08546e+06
M291T362_2	291.117	362.072	Tulobuterol	(M+CH3CN+Na)+						183204	2.03274e+06	1.06701e+06	606906	221773	1.34863e+06	467192	422162	1.96747e+06	153236	183105	874538	470843	487767	579017
M247T337	247.111	336.77	Tyr-Thr	(M+H-2H2O)+						185273	119142	168408	12032.3	96035.2	39493.7	552708	1.34303e+06	10800.1	65069.2	60913.5	28083.5	141244	146491	150393
M864T54	863.691	53.5038	Ubiquinone-10	[M+H]+	HMDB0001072	C11378	Lipids and lipid-like molecules	Prenol lipids	Quinone and hydroquinone lipids	4.80905e+06	1.57865e+06	2.1547e+06	1.66795e+06	3.20401e+06	2.89948e+06	1.86277e+06	2.30535e+06	666234	2.00812e+06	2.54088e+06	795416	1.69346e+06	1.7705e+06	1.69326e+06
M61T238	61.0404	237.986	Urea	[M+H]+	HMDB0000294	C00086	Organic acids and derivatives	Organic carbonic acids and derivatives	Ureas	5.20122e+06	1.10605e+07	1.54284e+07	9.35198e+06	7.80153e+06	1.15935e+07	4.59172e+06	1.73898e+07	5.15254e+06	4.07907e+06	7.23691e+06	2.1344e+06	8.08033e+06	7.84266e+06	8.08004e+06
M274T493	274.212	492.932	Val-Arg	[M+H]+			Organic acids and derivatives	Carboxylic acids and derivatives	Amino acids, peptides, and analogues	555454	1.7778e+06	2.55182e+07	4.06079e+06	1.25155e+07	133274	1.44101e+07	66664.4	308581	163062	2.12413e+07	162060	757556	798350	798581
M231T287	231.17	287.365	Val-Ile	[M+H]+			Organic acids and derivatives	Carboxylic acids and derivatives	Amino acids, peptides, and analogues	3.97123e+06	9.83506e+06	1.0457e+07	4.50073e+06	6.13349e+06	8.53688e+06	2.95844e+06	2.17312e+06	4.68852e+06	4.74201e+06	6.09139e+06	7.26159e+06	5.78475e+06	5.78142e+06	5.82864e+06
M128T64	128.107	63.7294	Vernolate	[M+H-C3H8S]+		C19097	Organosulfur compounds	Thiocarbonyl compounds	Thiocarbamic acid derivatives	5.2713e+06	5.8148e+06	1.79515e+06	6.33704e+06	6.62236e+06	2.93163e+06	4.93913e+06	5.77356e+06	4.15494e+06	3.84638e+06	6.17357e+06	6.53049e+06	6.99235e+06	6.99509e+06	7.48899e+06
M307T318_1	307.044	317.925	Xanthosine	[M+Na]+	HMDB0000299	C01762	Nucleosides, nucleotides, and analogues	Purine nucleosides		1.04849e+08	1.09955e+08	4.62594e+07	3.5085e+07	3.73427e+07	7.47288e+07	4.85042e+07	7.7338e+07	9.68197e+07	5.5205e+07	5.04181e+07	6.27532e+07	7.47948e+07	7.58444e+07	7.47732e+07
M206T286	206.046	285.733	Xanthurenic acid	[M+H]+	HMDB0000881	C02470	Organoheterocyclic compounds	Quinolines and derivatives	Quinoline carboxylic acids	3.32879e+06	3.20163e+06	4.08017e+06	2.87624e+06	1.17152e+07	5.33103e+06	1.16637e+07	2.30562e+06	3.96563e+06	3.52374e+06	3.22981e+06	2.34397e+06	4.61512e+06	4.58624e+06	4.58631e+06
M355T358	355.197	358.469	Yohimbine	[M+H]+	HMDB0015464	C09256				481490	495457	452916	1.13329e+06	1.17977e+06	720469	2.3925e+06	5.04948e+06	500625	478910	1.17751e+06	439664	1.19857e+06	1.21928e+06	1.19883e+06
M119T64_3	119.086	64.1927	Zerumbone	[M+H-C6H12O]+		C20262	Lipids and lipid-like molecules	Prenol lipids	Sesquiterpenoids	1.1491e+08	9.09345e+07	1.04613e+08	7.96356e+07	8.287e+07	9.84539e+07	7.20228e+07	7.5019e+07	9.22807e+07	8.03414e+07	8.09572e+07	7.06365e+07	9.28143e+07	9.28161e+07	9.32593e+07

## Sheet: neg
Table S1. The metabolites were identified in chicken samples from UHPLC-Q-TOF-MS/MS data in negative ion mode.
ID	m/z	rt(s)	Name	adduct	HMDB	KEGG	SuperClass	Class	SubClass	TBsf-ncf-rep1	TBsf-ncf-rep2	TBsf-ncf-rep3	TBsf-ncf-rep4	TBsf-bpf-rep1	TBsf-bpf-rep2	TBsf-bpf-rep3	TBsf-bpf-rep4	BF-gsc-rep1	BF-gsc-rep2	BF-gsc-rep3	BF-gsc-rep4	QC-2	QC-3	QC-1
M293T351	293.069	351.264	10-formyl-7,8-dihydrofolic acid	[M-H-C7H7ON5]-	HMDB0006485	C03204	Organoheterocyclic compounds	Pteridines and derivatives	Pterins and derivatives	151921	2.16326e+06	772690	1.99581e+06	3.2932e+06	683450	305052	58672.3	9.08414e+06	1.23312e+06	6.74785e+06	1.25494e+06	1.93531e+06	2.09973e+06	1.93634e+06
M329T241	329.235	241.48	11beta-hydroxyprogesterone	[M-H]-	HMDB0004031	C05498	Lipids and lipid-like molecules	Steroids and steroid derivatives	Pregnane steroids	556639	2.27215e+06	2.48769e+06	6.38931e+06	1.3716e+06	460276	3.08044e+06	5.75792e+06	367613	400903	84557.2	101631	1.9144e+06	2.26052e+06	2.25736e+06
M775T254	774.549	253.737	1-(1z-octadecenyl)-2-(4z,7z,10z,13z,16z,19z-docosahexaenoyl)-sn-glycero-3-phosphoethanolamine	[M-H]-						5.64063e+07	4.8159e+07	4.08886e+07	3.94021e+07	3.46919e+07	3.20988e+07	2.1824e+07	2.16791e+07	3.8041e+07	4.8259e+07	3.947e+07	7.95397e+07	3.79776e+07	3.63673e+07	3.79709e+07
M751T68	750.544	67.579	1-(1z-octadecenyl)-2-(5z,8z,11z,14z-eicosatetraenoyl)-sn-glycero-3-phosphoethanolamine	[M-H]-	HMDB0005779		Lipids and lipid-like molecules	Glycerophospholipids	Glycerophosphoethanolamines	3.55116e+08	2.23133e+08	1.69024e+08	2.35975e+08	4.30957e+08	1.82354e+08	3.09303e+08	2.92487e+08	2.15233e+08	1.69846e+08	1.96216e+08	2.43599e+08	2.43175e+08	2.40335e+08	2.43166e+08
M729T257	728.558	256.594	1-(1z-octadecenyl)-2-(9z-octadecenoyl)-sn-glycero-3-phosphoethanolamine	[M-H]-	HMDB0011375		Lipids and lipid-like molecules	Glycerophospholipids	Glycerophosphoethanolamines	9.04504e+06	1.52202e+07	1.05928e+07	1.00219e+07	7.01708e+06	6.56653e+06	1.15543e+07	3.2491e+06	7.75285e+06	8.82565e+06	7.98333e+06	1.17381e+07	7.66476e+06	7.65604e+06	7.97036e+06
M295T66_2	295.228	66.248	12(13)-epoxy-9z-octadecenoic acid	[M-H]-	HMDB0004702		Lipids and lipid-like molecules	Fatty Acyls	Fatty acids and conjugates	6.36676e+06	7.59339e+06	9.7386e+06	8.7064e+06	8.34041e+06	5.53325e+06	1.5614e+07	3.03368e+07	1.73581e+07	5.8417e+06	1.26734e+07	9.60455e+06	1.02423e+07	1.0666e+07	1.02465e+07
M165T357	165.019	357.061	1,2-benzenedicarboxylic acid	[M-H]-	HMDB0002107	C01606	Benzenoids	Benzene and substituted derivatives	Benzoic acids and derivatives	1.15807e+07	1.45274e+07	1.44859e+07	1.12124e+07	1.14962e+07	1.35966e+07	1.39596e+07	1.41184e+07	1.37892e+07	1.47283e+07	1.25252e+07	1.27056e+07	1.46452e+07	1.46455e+07	1.44199e+07
M770T66	769.504	66.2821	1,2-dioleoyl-sn-glycero-3-phospho-l-serine	[M-H-NH3]-	HMDB0012390		Lipids and lipid-like molecules	Glycerophospholipids	Glycerophosphoserines	5.87808e+07	6.17928e+07	4.81563e+07	3.25903e+07	4.13661e+07	4.34197e+07	1.16804e+08	8.39445e+07	2.66931e+07	3.69424e+07	2.77995e+07	3.44948e+07	4.89138e+07	4.80883e+07	4.80988e+07
M774T90	773.534	89.5559	1,2-distearoyl-sn-glycero-3-phospho-l-serine	[M-H-NH3]-	HMDB0012378		Lipids and lipid-like molecules	Glycerophospholipids	Glycerophosphoserines	4.41103e+06	2.56641e+07	2.1674e+07	1.84561e+07	1.64276e+07	1.75429e+07	6.0906e+07	6.93686e+07	2.45414e+07	2.80175e+07	2.75446e+07	3.35246e+07	3.00057e+07	3.00365e+07	3.07929e+07
M195T439	195.088	438.666	1,2-propanediol, 3-(1,3-benzodioxol-5-yl)-	[M-H]-	HMDB0030571					665331	1.06479e+06	676562	806251	237686	432626	220042	264978	1.22688e+06	942861	588712	812259	694759	691389	661524
M231T372	231.031	372.313	1-(3,4-dichlorophenyl)-3,3-dimethylurea	[M-H]-		C18428	Benzenoids	Benzene and substituted derivatives	N-phenylureas	1.62532e+06	983408	1.55767e+06	1.71898e+06	603104	383381	2.76102e+06	2.69184e+06	2.99336e+06	1.20464e+06	2.86802e+06	605859	1.82112e+06	1.93882e+06	1.94118e+06
M299T998	299.26	998.15	13-hydroxy-9z,11e-octadecadienoic acid	[M-H]1-	HMDB0112194		Lipids and lipid-like molecules	Fatty Acyls	Lineolic acids and derivatives	1.5593e+06	1.51499e+06	1.58214e+06	1.49113e+06	1.70615e+06	2.14955e+06	1.57817e+06	1.97564e+06	1.80143e+06	1.52161e+06	1.39345e+06	1.88567e+06	1.65169e+06	1.59116e+06	1.65066e+06
M85T383	85.0284	383.442	1,4-butynediol	[M-H]-	HMDB0012136	C05771	Organic oxygen compounds	Organooxygen compounds	Alcohols and polyols	6.73394e+06	6.06187e+06	9.06006e+06	8.14586e+06	7.73882e+06	6.66329e+06	1.30564e+07	1.14125e+07	3.69504e+06	5.6793e+06	6.1959e+06	3.31667e+06	7.12923e+06	7.0359e+06	7.0908e+06
M163T97	163.039	97.0341	1,5-anhydro-d-sorbitol	[M-H]-	HMDB0002712	C07326	Organic oxygen compounds	Organooxygen compounds	Carbohydrates and carbohydrate conjugates	7.50255e+06	6.10347e+06	4.72253e+06	4.62391e+06	3.85778e+06	3.55512e+06	8.59241e+06	1.41765e+07	2.11069e+06	4.19974e+06	2.04961e+06	3.46568e+06	5.40262e+06	5.12428e+06	5.12279e+06
M319T66	319.228	65.6098	15(s)-hydroxy-(5z,8z,11z,13e)-eicosatetraenoic acid	[M-H]-	HMDB0003876	C04742	Lipids and lipid-like molecules	Fatty Acyls	Eicosanoids	3.12182e+06	1.149e+06	208624	3.23323e+06	907374	594891	5.28577e+06	3.71624e+07	4.3234e+06	2.67934e+06	2.0755e+06	5.71227e+06	4.58462e+06	4.34899e+06	4.34472e+06
M395T37	395.262	36.9275	16,16-dimethyl-6-ketoprostaglandin e1	[M-H]-			Lipids and lipid-like molecules	Fatty Acyls	Eicosanoids	5.18688e+06	6.66377e+06	3.47449e+06	8.28632e+06	1.102e+07	217716	4.41202e+06	5.95171e+06	1.45547e+06	2.85732e+06	2.09931e+06	5.94628e+06	2.77581e+07	2.78245e+07	2.8008e+07
M271T66	271.228	66.4325	16-hydroxyhexadecanoic acid	[M-H]-	HMDB0006294	C18218	Lipids and lipid-like molecules	Fatty Acyls	Fatty acids and conjugates	2.39816e+07	2.41511e+07	1.56614e+07	1.32342e+07	1.46873e+07	1.42536e+07	3.0515e+07	2.91585e+07	2.07433e+08	2.73801e+08	1.35444e+08	2.78177e+08	1.01779e+08	1.01772e+08	1.0078e+08
M271T161	271.228	160.982	16-Hydroxypalmitic acid	(M-H)-	HMDB0006294	C18218	Lipids and lipid-like molecules	Fatty Acyls	Fatty acids and conjugates	113578	106484	2.0964e+06	2.0964e+06	71755.3	2.0964e+06	560846	158003	4.97521e+06	1.82975e+06	3.90477e+06	9.58553e+06	1.69963e+06	2.07306e+06	2.06875e+06
M355T48	355.196	48.194	16-phenyltetranorprostaglandin f2.alpha.	[M-H-H2O]-			Lipids and lipid-like molecules	Fatty Acyls	Eicosanoids	403224	101800	1.7851e+06	1.7851e+06	141820	258607	1.09771e+06	148975	135303	109035	1.7851e+06	541109	4.46825e+06	4.36997e+06	4.43462e+06
M451T36	451.324	36.2615	18.beta.-glycyrrhetinic acid	[M-H-H2O]-			Lipids and lipid-like molecules	Prenol lipids	Triterpenoids	3.32676e+06	4.14495e+06	894873	4.2887e+06	1.05777e+07	9.77914e+06	2.71353e+06	3.9174e+06	209511	1.9792e+06	502493	3.22498e+06	2.73751e+07	2.7688e+07	2.73818e+07
M337T44	337.184	43.6242	18-carboxydinorleukotriene b4	[M-H]-			Lipids and lipid-like molecules	Fatty Acyls	Fatty acids and conjugates	1.54304e+06	2.8367e+06	846951	3.59214e+06	859571	1.16837e+06	2.42712e+06	1.4438e+06	2.9648e+06	1.46619e+06	1.48868e+06	3.10499e+06	1.10563e+07	1.08532e+07	1.09139e+07
M476T278	476.278	278.225	1-(9z,12z-octadecadienoyl)-2-hydroxy-sn-glycero-3-phosphoethanolamine	[M]-			Lipids and lipid-like molecules	Fatty Acyls	Lineolic acids and derivatives	8.1213e+06	6.96855e+06	5.22441e+06	4.17585e+06	2.31894e+06	1.74453e+06	5.71458e+06	6.62188e+06	3.6002e+06	5.24655e+06	1.43827e+06	6.23863e+06	5.38219e+06	5.38225e+06	5.34575e+06
M409T279	409.237	279.046	1-hexadecanoyl-2-sn-glycero-3-phosphate	[M-H]-			Lipids and lipid-like molecules	Glycerophospholipids	Glycerophosphates	2.00635e+06	1.77385e+06	1.44619e+06	1.29285e+06	863080	582479	1.62011e+06	2.66455e+06	1.64405e+06	1.90433e+06	1.22951e+06	3.63358e+06	2.00901e+06	2.10429e+06	2.02945e+06
M187T36_2	187.041	35.5316	1-hydroxy-2-naphthoic acid	[M-H]-		C03203	Benzenoids	Naphthalenes	Naphthalenecarboxylic acids and derivatives	1.823e+09	3.99037e+09	4.86265e+09	4.57694e+09	1.37696e+10	4.47094e+09	1.5246e+09	4.61192e+08	4.7504e+09	2.13285e+09	6.50432e+09	1.97883e+09	4.83198e+09	4.74519e+09	4.52187e+09
M168T439	168.077	438.894	1-Methylhistidine	(M-H)-	HMDB0000001/HMDB0000479	C01152	Organic acids and derivatives	Carboxylic acids and derivatives	Amino acids, peptides, and analogues	897212	1.2054e+06	6.90533e+06	1.05996e+06	1.37291e+06	1.11857e+06	1.52116e+06	1.38663e+06	966596	605198	6.26154e+06	601688	2.48996e+06	2.35815e+06	3.86044e+06
M171T352	171.066	352.251	1-naphthoic acid	[M-H]-		C14091	Benzenoids	Naphthalenes	Naphthalenecarboxylic acids and derivatives	9.53111e+06	9.85516e+06	8.71173e+06	8.40188e+06	1.00647e+07	8.18759e+06	1.2088e+07	1.17294e+07	9.43718e+06	7.44818e+06	9.32071e+06	6.06719e+06	7.90866e+06	7.90796e+06	7.81749e+06
M403T60	403.265	60.4157	1-o-(9z-octadecenyl)-sn-glycero-2,3-cyclic-phosphate	[M-H]-						7.10202e+06	1.26091e+07	5.40106e+06	5.57415e+06	8.25114e+06	2.3923e+07	6.09793e+06	4.37804e+06	8.91562e+06	6.35895e+06	1.54762e+07	1.35846e+07	9.49442e+06	9.32962e+06	9.32609e+06
M599T291	599.321	291.275	1-octadecanoyl-sn-glycero-3-phospho-(1'-myo-inositol)	[M-H]-			Lipids and lipid-like molecules	Glycerophospholipids	Glycerophosphoinositols	1.18645e+07	6.80541e+06	8.07157e+06	6.15701e+06	3.39873e+06	2.29177e+06	1.22733e+07	1.82982e+07	4.75098e+06	7.43164e+06	4.33495e+06	1.49654e+07	8.92136e+06	8.894e+06	8.92113e+06
M509T86	509.29	85.8726	1-oleoyl-2-hydroxy-sn-glycero-3-phospho-(1'-rac-glycerol)	[M-H]-			Lipids and lipid-like molecules	Glycerophospholipids	Glycerophosphoglycerols	1.09454e+07	1.34331e+07	4.19338e+06	4.29955e+06	4.10681e+06	3.40415e+06	1.2719e+07	1.3885e+07	1.25751e+07	6.46199e+06	8.0603e+06	1.66107e+07	8.39116e+06	8.71695e+06	8.70487e+06
M817T250	816.53	250.008	1-palmitoyl-2-arachidonoyl-sn-glycero-3-phosphocholine	[M+Cl]-	HMDB0007982		Lipids and lipid-like molecules	Glycerophospholipids	Glycerophosphocholines	9.36793e+07	8.24885e+07	1.10239e+08	5.62246e+07	1.36271e+08	1.79643e+08	6.27507e+07	8.66611e+07	6.07656e+07	1.45607e+08	1.66822e+08	1.49089e+08	1.14596e+08	1.11947e+08	1.14599e+08
M782T264	782.499	263.963	1-palmitoyl-2-arachidonoyl-sn-glycero-3-phosphoserine	[M-H]-	HMDB0012361		Lipids and lipid-like molecules	Glycerophospholipids	Glycerophosphoserines	1.92813e+06	3.4279e+06	2.58394e+06	3.9166e+06	2.76203e+06	6.52703e+06	2.35065e+06	1.55106e+07	3.97598e+06	2.8303e+06	6.35492e+06	8.63952e+06	2.95904e+06	2.92904e+06	2.9816e+06
M483T66	483.273	66.2821	1-palmitoyl-2-hydroxy-sn-glycero-3-phospho-(1'-rac-glycerol)	[M-H]-			Lipids and lipid-like molecules	Glycerophospholipids	Glycerophosphoglycerols	4.11797e+07	8.25664e+07	3.75233e+07	1.49287e+07	2.06188e+07	6.55124e+06	5.96152e+07	5.23598e+07	5.5807e+07	3.33253e+07	2.42036e+07	8.44838e+07	4.22216e+07	4.17781e+07	4.17683e+07
M748T66	747.519	66.2821	1-palmitoyl-2-oleoyl-phosphatidylglycerol	[M-H]-			Lipids and lipid-like molecules	Glycerophospholipids	Glycerophosphoglycerols	3.86085e+08	5.05184e+08	3.26953e+08	2.2207e+08	5.21062e+08	2.69123e+08	4.27648e+08	3.84686e+08	7.24284e+08	4.72441e+08	8.20853e+08	7.06365e+08	4.44107e+08	4.25613e+08	4.43999e+08
M811T260	810.531	259.623	1-stearoyl-2-arachidonoyl-sn-glycero-3-phosphoserine	[M-H]-	HMDB0012383		Lipids and lipid-like molecules	Glycerophospholipids	Glycerophosphoserines	1.8521e+07	2.65666e+07	2.69216e+07	2.71925e+07	2.25873e+07	2.30626e+07	3.33471e+07	4.45704e+07	2.41343e+07	2.89249e+07	2.52479e+07	3.72056e+07	2.59482e+07	2.625e+07	2.59471e+07
M869T243	868.538	243.202	1-stearoyl-2-docosahexaenoyl-sn-glycero-3-phosphocholine	[M+Cl]-	HMDB0008057		Lipids and lipid-like molecules	Glycerophospholipids	Glycerophosphocholines	2.78855e+06	2.27009e+06	1.64994e+06	1.37499e+06	1.29267e+06	2.28213e+06	2.04371e+06	2.08942e+06	1.04574e+06	2.32941e+06	2.36116e+06	2.14184e+06	1.88566e+06	1.94229e+06	1.93982e+06
M480T279	480.31	279.169	1-stearoyl-2-hydroxy-sn-glycero-3-phosphoethanolamine	[M-H]-	HMDB0011130		Lipids and lipid-like molecules	Glycerophospholipids	Glycerophosphoethanolamines	2.32214e+08	2.56909e+08	1.36967e+08	1.10898e+08	6.16306e+07	1.95091e+07	1.27544e+08	1.43255e+08	1.81988e+08	1.69059e+08	5.93953e+07	2.44887e+08	1.60866e+08	1.60861e+08	1.59957e+08
M743T68	742.536	67.579	1-stearoyl-2-linoleoyl-sn-glycero-3-phosphoethanolamine	[M-H]-	HMDB0008994		Lipids and lipid-like molecules	Glycerophospholipids	Glycerophosphoethanolamines	2.07489e+07	6.16734e+06	1.16497e+07	1.75087e+07	1.68132e+07	1.53763e+07	1.46531e+07	1.99975e+07	8.1785e+06	1.43942e+07	1.01993e+07	1.2504e+07	1.44976e+07	1.40972e+07	1.45019e+07
M787T264	786.531	263.629	1-stearoyl-2-linoleoyl-sn-glycero-3-phospho-l-serine	[M-H]-	HMDB0012380		Lipids and lipid-like molecules	Glycerophospholipids	Glycerophosphoserines	3.10589e+07	2.05008e+07	3.25317e+07	2.3444e+07	2.35366e+07	2.49245e+07	2.83977e+07	3.17067e+07	1.4551e+07	1.8237e+07	1.26604e+07	1.73519e+07	2.06459e+07	2.06479e+07	2.16045e+07
M197T422	196.894	421.945	2,4,5-trichlorophenol	[M-H+2i]-		C07101	Benzenoids	Phenols	Halophenols	1.79184e+07	1.55022e+07	1.44045e+07	2.05876e+07	1.28642e+07	1.08326e+07	4.67767e+06	9.57494e+06	3.83939e+06	5.97269e+06	6.03985e+06	7.8108e+06	8.23762e+06	8.84252e+06	8.21778e+06
M195T924	194.906	924.256	2,4,6-trichlorophenol	[M-H]-		C07098	Benzenoids	Phenols	Halophenols	1.24046e+08	8.39293e+07	2.40476e+08	1.22682e+08	1.27983e+08	4.61034e+07	1.24843e+08	1.32675e+08	2.22706e+08	2.42348e+08	6.26964e+07	1.7617e+08	1.5893e+08	1.78988e+08	1.586e+08
M189T222	188.951	222.464	2,4-dichlorobenzoic acid	[M-H]-		C06670	Benzenoids	Benzene and substituted derivatives	Benzoic acids and derivatives	2.67471e+07	2.53773e+07	2.04291e+07	1.89043e+07	1.93919e+07	1.90306e+07	2.73604e+07	2.95359e+07	2.01627e+07	2.61883e+07	2.33225e+07	2.61951e+07	2.26395e+07	2.29861e+07	2.29821e+07
M125T223_2	124.991	223.398	2,4-dichlorophenol	[M-H-HCl]-	HMDB0004811	C02625	Benzenoids	Benzene and substituted derivatives	Halobenzenes	5.57838e+07	6.25309e+07	1.11456e+08	1.11479e+08	9.88078e+07	6.67855e+07	1.93208e+08	2.73525e+08	2.399e+07	2.05361e+07	4.91236e+07	1.63718e+07	8.52988e+07	8.52782e+07	8.72224e+07
M183T37	183.004	37.3421	2,4-dinitrophenol	[M-H]-		C02496	Benzenoids	Phenols	Nitrophenols	3.81718e+06	2.29544e+06	8.1074e+06	1.24848e+06	3.40772e+06	1.28571e+06	3.71628e+06	5.69373e+06	1.766e+06	1.815e+06	7.48898e+06	2.01538e+06	1.46321e+06	1.94382e+06	1.956e+06
M256T52	256.029	52.4533	2,4-thiazolidinedione, 5-(6-quinoxalinylmethylene)-	[M-H]-			Organoheterocyclic compounds	Diazanaphthalenes	Benzodiazines	178262	344866	988705	542962	147714	413489	1.02814e+06	2.69087e+06	413489	459241	93224.8	459241	361398	398322	400175
M111T292	111.019	292.108	2,5-furandicarboxylic acid	[M-H-CO2]-	HMDB0004812	C20450	Organoheterocyclic compounds	Furans	Furoic acid and derivatives	5.81599e+06	5.10684e+06	5.93017e+06	4.66845e+06	4.4963e+06	5.05968e+06	6.36185e+06	8.16425e+06	4.81289e+06	3.50297e+06	3.83529e+06	3.85919e+06	4.94524e+06	4.81219e+06	4.94501e+06
M202T330	202.026	330.173	2,8-quinolinediol	[M-H]-			Organoheterocyclic compounds	Quinolines and derivatives	Quinolones and derivatives	6.31024e+06	1.21173e+07	1.47097e+07	1.61339e+07	1.74811e+07	1.28528e+07	1.87404e+07	1.61659e+07	1.20312e+07	1.06293e+07	9.67876e+06	1.48297e+07	1.20176e+07	1.19905e+07	1.12656e+07
M239T344	239.079	343.586	2-(9h-xanthen-9-yl)-malonic acid	[M-H-CO2]-			Organoheterocyclic compounds	Benzopyrans	1-benzopyrans	1.2053e+07	1.22355e+07	7.84429e+06	1.08759e+07	1.18724e+07	1.0242e+07	1.71027e+07	1.59992e+07	8.56388e+06	7.7145e+06	1.01636e+07	9.90626e+06	1.11084e+07	1.11087e+07	1.10122e+07
M522T285	522.284	284.972	2-amino-3-[hydroxy-[2-hydroxy-3-[octadec-9-enoyl]oxypropoxy]phosphoryl]oxypropanoic acid	[M-H]-			Lipids and lipid-like molecules	Glycerophospholipids	Glycerophosphoserines	1.81717e+06	1.14189e+06	674774	1.0656e+06	667241	420555	3.34569e+06	5.89436e+06	591212	807533	957921	1.16979e+06	1.69399e+06	1.69402e+06	1.61682e+06
M747T67	746.514	67.1976	(2-aminoethoxy)[2-[docosa-4.7.10.13.16.19-hexaenoyloxy]-3-[hexadec-1-en-1-yloxy]propoxy]phosphinic acid	[M-H]-	HMDB0005780		Lipids and lipid-like molecules	Glycerophospholipids	Glycerophosphoethanolamines	2.7616e+08	2.3551e+08	1.45797e+08	2.09967e+08	3.41041e+08	1.67269e+08	1.14705e+08	1.48495e+08	2.88637e+08	2.77062e+08	4.34276e+08	2.66512e+08	2.35588e+08	2.35522e+08	2.43085e+08
M773T90	772.528	89.5767	(2-aminoethoxy)[2-[docosa-4.7.10.13.16.19-hexaenoyloxy]-3-[octadeca-1.9-dien-1-yloxy]propoxy]phosphinic acid	[M-H]-	HMDB0011460		Lipids and lipid-like molecules	Glycerophospholipids	Glycerophosphoethanolamines	3.52546e+07	2.18003e+07	1.51319e+07	2.7723e+07	2.07117e+07	1.50115e+07	2.77845e+07	2.31672e+07	1.37138e+07	1.96141e+07	3.39748e+07	2.2221e+07	2.25123e+07	2.25174e+07	2.38983e+07
M727T239	726.544	238.847	(2-aminoethoxy)[2-[octadec-9-enoyloxy]-3-[octadeca-1.11-dien-1-yloxy]propoxy]phosphinic acid	[M-H]-	HMDB0011408		Lipids and lipid-like molecules	Glycerophospholipids	Glycerophosphoethanolamines	4.22486e+06	9.0899e+06	7.04379e+06	3.04124e+06	5.53569e+06	5.10903e+06	6.46757e+06	1.00001e+06	2.96624e+06	3.85511e+06	3.8712e+06	2.61258e+06	3.62483e+06	3.69075e+06	3.69122e+06
M723T68	722.514	68.028	(2-aminoethoxy)[3-[hexadec-1-en-1-yloxy]-2-[icosa-5.8.11.14-tetraenoyloxy]propoxy]phosphinic acid	[M-H]-	HMDB0011352		Lipids and lipid-like molecules	Glycerophospholipids	Glycerophosphoethanolamines	4.10983e+08	2.58379e+08	1.3797e+08	2.86799e+08	6.5358e+08	2.86052e+08	3.96534e+08	5.1043e+08	3.52628e+08	3.02921e+08	3.80543e+08	3.30078e+08	3.47008e+08	3.40723e+08	3.47056e+08
M249T353	249.022	353.216	2-aminoethylphosphonic acid	[2M-H]-	HMDB0011747	C03557	Organic acids and derivatives	Organic phosphonic acids and derivatives	Organic phosphonic acids	453964	36658.9	124856	113630	410533	41238.6	2.3576e+06	2.56971e+06	136209	133397	155888	133397	206681	206696	204020
M245T360	245.043	359.872	2'-chloro-2-hydroxy-5-methylbenzophenone	[M-H]-			Benzenoids	Benzene and substituted derivatives	Benzophenones	7.71405e+06	8.80006e+06	8.05078e+06	5.47536e+06	6.55227e+06	3.33095e+06	1.28349e+07	1.1842e+07	5.11669e+06	4.3377e+06	5.1952e+06	2.51656e+06	8.48313e+06	8.46919e+06	8.17414e+06
M155T57	155.001	56.6306	2-chlorobenzoic acid	[M-H]-		C02357	Benzenoids	Benzene and substituted derivatives	Benzoic acids and derivatives	1.99392e+06	2.99307e+06	8.4252e+06	8.37172e+06	5.47083e+06	5.27596e+06	4.84053e+06	1.24359e+07	2.00109e+06	3.41907e+07	1.20502e+07	5.17691e+06	7.84499e+06	7.88508e+06	7.84471e+06
M263T272	263.141	272.028	2-cis-4-trans-abscisic acid	[M-H]-		C06082	Lipids and lipid-like molecules	Prenol lipids	Sesquiterpenoids	2.30153e+06	4.92378e+06	4.08016e+06	2.34353e+06	2.46511e+06	2.81392e+06	1.69591e+06	1.16206e+06	2.49153e+06	2.66942e+06	1.98686e+06	3.1085e+06	2.82538e+06	2.8253e+06	2.77934e+06
M179T361	179.056	361.235	2-deoxy-d-ribose	[M+HCO2]-		C01801	Organic oxygen compounds	Organooxygen compounds	Carbonyl compounds	2.20354e+07	2.72875e+07	4.73471e+07	3.90514e+07	5.10302e+07	3.76097e+07	2.43681e+07	5.90617e+06	4.0553e+07	2.39718e+07	4.78267e+07	1.93194e+07	3.29184e+07	3.36786e+07	3.36752e+07
M213T284	213.017	283.956	2-deoxyribose 5-phosphate	[M-H]-	HMDB0001031	C00673	Organic oxygen compounds	Organooxygen compounds	Carbohydrates and carbohydrate conjugates	9.33751e+06	1.08383e+07	1.69769e+07	1.59206e+07	1.66799e+07	2.25059e+07	4.42825e+06	390027	2.57602e+07	1.37279e+07	1.8494e+07	1.38739e+07	1.19227e+07	1.24201e+07	1.24206e+07
M307T319	307.035	319.297	2'-deoxyuridine 5'-monophosphate	[M-H]-	HMDB0001409	C00365	Nucleosides, nucleotides, and analogues	Pyrimidine nucleotides	Pyrimidine deoxyribonucleotides	3.79945e+07	4.31544e+07	5.08952e+07	4.34133e+07	4.81419e+07	4.06424e+07	3.86755e+07	2.01574e+07	4.95759e+07	3.85338e+07	6.01263e+07	2.9981e+07	3.99664e+07	3.99664e+07	3.98234e+07
M835T260	834.53	259.642	2-docosahexaenoyl-1-stearoyl-sn-glycero-3-phosphoserine	[M-H]-	HMDB0010167		Lipids and lipid-like molecules	Glycerophospholipids	Glycerophosphoserines	1.01224e+07	1.67572e+07	1.35818e+07	9.85936e+06	1.98893e+07	1.35623e+07	6.63259e+06	1.07663e+07	2.16807e+07	2.6598e+07	3.39159e+07	3.88811e+07	1.52035e+07	1.51904e+07	1.44029e+07
M425T38	425.257	37.7729	(2e,6e,10e)-13-[(2r)-6-hydroxy-2,8-dimethyl-3,4-dihydrochromen-2-yl]-2,6,10-trimethyltrideca-2,6,10-trienoic acid	[M-H]-			Lipids and lipid-like molecules	Prenol lipids	Quinone and hydroquinone lipids	973375	2.01693e+06	161534	3.9378e+06	2.64405e+06	1.80712e+06	3.14202e+06	1.14506e+06	1.50078e+06	1.14958e+06	2.27774e+06	1.51857e+06	3.73413e+06	3.74807e+06	3.74806e+06
M111T412	111.008	411.519	2-furancarboxylic acid	[M-H]-	HMDB0000617	C01546	Organoheterocyclic compounds	Furans	Furoic acid and derivatives	2.07288e+07	1.87607e+07	1.97306e+07	1.94883e+07	2.01391e+07	1.29972e+07	4.69043e+07	5.41082e+07	1.61173e+07	1.75922e+07	2.12093e+07	1.16597e+07	2.30061e+07	2.22779e+07	2.22792e+07
M111T864	111.008	863.508	2-Furoic acid	[M-H]-	HMDB0000617	C01546	Organoheterocyclic compounds	Furans	Furoic acid and derivatives	1.26253e+07	1.19532e+07	1.06227e+07	8.05922e+06	9.11699e+06	1.65611e+07	9.75027e+06	9.83451e+06	7.08407e+06	9.8007e+06	1.11463e+07	8.61037e+06	1.02562e+07	1.02834e+07	1.08171e+07
M223T60_2	223.028	60.1076	2-hydroxyanthraquinone	[M-H]-		C09605	Benzenoids	Anthracenes	Anthraquinones	2.71439e+06	1.84135e+06	2.02597e+06	1.24756e+07	1.03689e+07	6.46202e+06	2.91052e+06	7.49929e+06	2.33336e+07	2.63258e+06	1.42939e+06	8.62912e+06	2.00024e+07	2.00016e+07	2.09168e+07
M151T107	151.039	107.339	2-hydroxyphenylacetic acid	[M-H]-	HMDB0000669	C05852	Benzenoids	Benzene and substituted derivatives	Phenylacetic acids	890921	744270	2.30919e+06	577369	6.93384e+06	5.39344e+06	7.53821e+06	5.12137e+06	911566	1.14288e+06	1.2176e+06	509163	2.72384e+06	2.76303e+06	2.76288e+06
M715T68	714.51	68.131	2-linoleoyl-1-palmitoyl-sn-glycero-3-phosphoethanolamine	[M-H]-	HMDB0008928		Lipids and lipid-like molecules	Glycerophospholipids	Glycerophosphoethanolamines	4.9673e+06	1.24499e+06	3.81841e+06	1.00406e+07	8.6792e+06	1.21924e+07	5.13292e+06	1.08935e+07	6.18109e+06	6.39149e+06	5.53086e+06	5.37627e+06	7.57462e+06	6.95826e+06	6.92852e+06
M119T264	119.034	263.619	2-methoxy-5-methylphenol	[M-H-H2O]-			Benzenoids	Phenols	Methoxyphenols	3.41235e+06	4.60581e+06	7.42842e+06	5.67025e+06	7.03303e+06	5.44136e+06	2.67693e+06	1.60924e+06	4.81125e+06	5.61238e+06	5.73275e+06	5.69814e+06	4.88157e+06	4.74135e+06	4.89968e+06
M168T287	168.033	286.645	2-methoxy-5-nitrophenol	[M-H]-		C17385	Benzenoids	Benzene and substituted derivatives	Nitrobenzenes	1.75708e+06	1.98515e+06	2.0215e+06	1.70875e+06	7.24648e+06	3.77138e+06	1.03624e+07	1.5017e+06	2.42006e+06	2.43431e+06	1.75928e+06	1.60017e+06	3.13099e+06	3.13097e+06	3.0776e+06
M207T50	207.012	50.0867	2-naphthalenesulfonic acid	[M-H]-		C06165	Benzenoids	Naphthalenes	Naphthalene sulfonic acids and derivatives	675001	2.99782e+06	456101	2.25888e+06	590745	1.85059e+06	1.74729e+06	877455	3.14529e+06	3.93452e+06	1.89293e+06	1.66284e+06	1.88446e+06	2.02334e+06	1.88524e+06
M761T264	760.516	263.683	2-oleoyl-1-palmitoyl-sn-glycero-3-phosphoserine	[M-H]-	HMDB0012357		Lipids and lipid-like molecules	Glycerophospholipids	Glycerophosphoserines	8.00522e+06	7.51803e+06	6.42819e+06	6.01361e+06	8.71253e+06	1.00624e+07	1.53625e+07	3.17767e+07	7.54607e+06	2.7018e+06	9.71098e+06	9.30801e+06	9.14953e+06	8.79528e+06	8.79255e+06
M181T453	181.009	453.43	2-Oxoadipic acid	(M+Na-2H)-	HMDB0000225	C00322	Organic acids and derivatives	Keto acids and derivatives	Medium-chain keto acids and derivatives	5.82808e+06	7.39672e+06	6.22018e+06	8.07301e+06	6.2466e+06	5.32345e+06	9.73478e+06	9.59935e+06	7.89353e+06	6.80407e+06	9.04575e+06	5.30806e+06	7.47302e+06	7.41782e+06	7.46998e+06
M157T235	157.087	234.706	2-oxooctanoic acid	[M-H]-	HMDB0013211		Organic acids and derivatives	Keto acids and derivatives	Medium-chain keto acids and derivatives	1.26213e+07	1.08753e+07	5.68102e+06	3.3577e+06	3.59864e+06	7.22289e+06	1.92342e+07	2.01082e+07	1.0661e+07	1.43966e+07	8.91093e+06	1.562e+07	6.85967e+06	7.26332e+06	7.25649e+06
M149T110	149.06	110.123	(.+/-.)-2-phenylpropanoic acid	[M-H]-	HMDB0011743					1.17501e+07	1.01754e+07	1.0636e+07	1.1202e+07	8.93459e+06	9.46938e+06	1.1353e+07	1.35738e+07	1.16653e+07	1.09599e+07	1.03423e+07	9.68805e+06	9.41133e+06	9.41116e+06	9.45156e+06
M297T57	297.049	57.442	3',4'-methylenedioxyorobol	[M-H]-			Phenylpropanoids and polyketides	Isoflavonoids	Isoflav-2-enes	1.72539e+06	685860	1.3484e+06	2.44041e+06	2.19176e+06	961012	1.60631e+06	2.7886e+06	4.36962e+06	378428	637913	2.15573e+06	4.2192e+06	4.21825e+06	4.33391e+06
M205T59	205.16	58.9116	3,5-di-tert-butyl-4-hydroxybenzoic acid	[M-H-CO2]-			Benzenoids	Benzene and substituted derivatives	Benzoic acids and derivatives	1.50905e+06	1.09437e+06	917500	1.44176e+06	856778	872421	674599	849950	1.26939e+06	1.21131e+06	1.3481e+06	1.50613e+06	2.61172e+06	2.61165e+06	2.65599e+06
M255T295	255.047	295.038	3-(5-phenylthiophen-2-yl)prop-2-ynyl acetate	[M-H]-			Organoheterocyclic compounds	Thiophenes	2,5-disubstituted thiophenes	478605	1.82795e+06	891436	1.11952e+06	1.6659e+06	1.13536e+06	272243	1.16098e+06	3.64635e+06	1.21071e+06	3.1196e+06	1.96183e+06	1.24495e+06	1.33847e+06	1.24828e+06
M290T360	290.089	360.071	3'-.alpha.-sialyl-n-acetyllactosamine	[M-H-C14H25O11N]-			Organic oxygen compounds	Organooxygen compounds	Carbohydrates and carbohydrate conjugates	3.25506e+06	1.20726e+06	4.3976e+06	1.81496e+06	4.55718e+06	2.25737e+06	7.01008e+06	6.27342e+06	1.38711e+06	1.73609e+06	3.65328e+06	1.05587e+06	3.12056e+06	3.14184e+06	3.09789e+06
M214T55	214.018	55.3202	3-chloro-l-tyrosine	[M-H]-	HMDB0001885		Organic acids and derivatives	Carboxylic acids and derivatives	Amino acids, peptides, and analogues	5.64124e+07	4.21563e+07	7.07854e+07	7.69572e+07	3.93608e+07	4.0456e+07	9.01969e+07	1.15108e+08	3.24939e+07	1.53514e+07	4.36907e+07	1.59988e+07	5.08399e+07	5.09787e+07	5.08394e+07
M161T362	161.045	362.168	3-hydroxy-3-methylglutaric acid	[M-H]-	HMDB0000355	C03761	Lipids and lipid-like molecules	Fatty Acyls	Fatty acids and conjugates	5.5829e+06	7.28826e+06	1.16506e+07	9.58746e+06	1.15934e+07	8.87004e+06	4.77643e+06	3.31083e+06	1.04171e+07	6.87837e+06	1.23612e+07	5.45864e+06	8.05366e+06	8.20264e+06	8.2025e+06
M237T58_2	237.15	57.6479	3-hydroxy-5,5,8a-trimethyl-3,4,4a,6,7,8-hexahydronaphthalene-2-carboxylic acid	[M-H]-			Organic acids and derivatives	Hydroxy acids and derivatives	Beta hydroxy acids and derivatives	2.49608e+06	2.57431e+06	1.25308e+06	2.93208e+06	2.68363e+06	2.54031e+06	1.99535e+06	1.345e+06	1.7346e+06	1.99387e+06	2.07204e+06	3.20578e+06	2.72288e+06	2.82319e+06	2.72267e+06
M121T82_2	121.029	82.0491	3-hydroxybenzaldehyde	[M-H]-		C03067	Organic oxygen compounds	Organooxygen compounds	Carbonyl compounds	6.66145e+06	6.62335e+06	7.47328e+06	7.13668e+06	6.95953e+06	7.42962e+06	7.48637e+06	1.02261e+07	5.65446e+06	5.56242e+06	5.42401e+06	4.04813e+06	6.74457e+06	6.80703e+06	6.80715e+06
M137T59_2	137.035	59.2536	3-hydroxybenzoic acid	[M-H]-	HMDB0002466	C00587	Benzenoids	Benzene and substituted derivatives	Benzoic acids and derivatives	1.29396e+06	940284	1.4121e+06	840343	757293	1.1246e+07	805834	1.0059e+06	555900	805773	1.50561e+06	774577	1.80725e+06	1.73371e+06	3.22704e+06
M147T368_2	147.029	367.677	3-hydroxyglutaric acid	[M-H]-	HMDB0000428		Organic acids and derivatives	Hydroxy acids and derivatives	Beta hydroxy acids and derivatives	2.14269e+06	2.79852e+06	3.82809e+06	2.35381e+06	7.57355e+06	2.7635e+06	1.72536e+07	2.34719e+07	3.73596e+06	4.34036e+06	8.05747e+06	3.00357e+06	5.6706e+06	5.77887e+06	5.67094e+06
M147T232	147.044	232.089	3-isochromanone	[M-H]-		C07728	Organoheterocyclic compounds	Benzopyrans	2-benzopyrans	2.39541e+06	2.17941e+06	1.6158e+06	1.99794e+06	1.88338e+06	678887	7.64798e+06	1.26113e+07	2.04555e+06	2.77546e+06	3.49409e+06	1.46767e+06	3.14358e+06	3.17229e+06	3.23448e+06
M263T55	263.023	54.8224	3-Methoxy-4-Hydroxyphenylglycol Sulfate	[M-H]-			Benzenoids	Phenols	Methoxyphenols	3.19312e+06	2.69021e+06	5.21414e+06	5.67088e+06	4.38989e+06	2.54005e+06	8.23299e+06	1.74354e+07	1.82979e+06	1.46323e+06	2.85594e+06	1.06894e+06	4.20264e+06	4.16981e+06	4.20335e+06
M168T399	168.078	399.492	3-methylhistidine	[M-H]-	HMDB0000479	C01152	Organic acids and derivatives	Carboxylic acids and derivatives	Amino acids, peptides, and analogues	2.25986e+08	2.37249e+08	2.44953e+08	2.22888e+08	2.69314e+08	2.25164e+08	3.05944e+08	3.02135e+08	1.87379e+08	1.7193e+08	2.44769e+08	1.70075e+08	2.44167e+08	2.44068e+08	2.41311e+08
M119T963_2	119.016	962.612	3-methylthiopropionate	[M-H]-	HMDB0001527	C08276	Lipids and lipid-like molecules	Fatty Acyls	Fatty acids and conjugates	5.08518e+07	3.8807e+07	4.07539e+07	4.33088e+07	4.19282e+07	4.4009e+07	3.42811e+07	3.78773e+07	3.81168e+07	3.93084e+07	3.59155e+07	3.81146e+07	4.36443e+07	4.19182e+07	4.34614e+07
M185T394	184.985	394.268	3-Phospho-D-glycerate	[M-H]-	HMDB0062707	C00197	Organic oxygen compounds	Organooxygen compounds	Carbohydrates and carbohydrate conjugates	3.68046e+06	8.05612e+06	1.45021e+07	1.10059e+07	1.68502e+07	1.13559e+07	1.55051e+06	2.83515e+06	1.86055e+07	1.71103e+07	2.13969e+07	1.1159e+07	1.26455e+07	1.26442e+07	1.3192e+07
M369T390_1	369.002	389.517	3-Phosphoserine	(2M-H)-	HMDB0000272/HMDB0001721	C01005	Organic acids and derivatives	Carboxylic acids and derivatives	Amino acids, peptides, and analogues	1.44517e+07	1.48501e+07	2.09073e+07	1.47421e+07	2.19341e+07	1.31308e+07	8.35753e+06	1.14491e+07	1.98255e+07	1.75539e+07	2.67577e+07	1.36183e+07	1.20813e+07	1.32937e+07	1.20597e+07
M197T35	197.019	34.7365	4,6-dinitro-o-cresol	[M-H]-		C18653	Benzenoids	Phenols	Nitrophenols	2.08069e+06	1.4598e+06	4.07314e+06	398478	178052	163058	1.02145e+06	2.88054e+06	674740	516201	2.58104e+06	1.4461e+06	493816	595465	493618
M151T284	151.038	283.942	4-Hydroxy-3-methylbenzoic acid	(M-H)-	HMDB0004815		Benzenoids	Benzene and substituted derivatives	Benzoic acids and derivatives	1.20633e+06	746753	964932	897378	1.16398e+06	1.14307e+06	1.14326e+06	1.81479e+06	823949	798173	667842	581654	960960	990805	961295
M121T230	121.029	229.546	4-hydroxybenzaldehyde	[M-H]-	HMDB0011718	C00633	Organic oxygen compounds	Organooxygen compounds	Carbonyl compounds	1.39029e+08	7.80076e+07	8.99677e+07	2.67898e+07	5.99635e+07	4.95573e+07	1.3383e+08	2.63231e+08	4.2779e+07	9.26056e+07	5.86339e+07	9.60561e+07	7.04284e+07	7.08253e+07	7.08244e+07
M162T112	162.055	112.172	4-hydroxy-l-glutamic acid	[M-H]-		C05947	Organic acids and derivatives	Carboxylic acids and derivatives	Amino acids, peptides, and analogues	179010	778433	5.84609e+06	2.14513e+06	5.221e+06	2.73598e+06	9.2808e+06	1.03489e+07	3.18816e+06	1.62719e+06	4.47145e+06	415326	4.65963e+06	4.71971e+06	4.71897e+06
M458T278	458.268	277.834	4-imidazolidineheptanoic acid, 3-[(2-cyclohexyl-2-hydroxyethyl)amino]-2,5-dioxo-1-(phenylmethyl)-	[M-H]-			Organoheterocyclic compounds	Azolidines	Imidazolidines	2.22852e+06	955220	1.1614e+06	1.15494e+06	675451	609233	2.39661e+06	2.29348e+06	601908	303803	285843	1.0228e+06	1.33021e+06	1.32979e+06	1.26644e+06
M151T399	151.051	399.422	4-methoxybenzoic acid	[M-H]-	HMDB0001101	C02519	Benzenoids	Benzene and substituted derivatives	Benzoic acids and derivatives	8.68916e+06	8.17467e+06	7.32072e+06	3.07636e+06	7.24209e+06	6.33458e+06	1.24361e+07	9.79637e+06	4.44399e+06	4.01786e+06	6.85741e+06	5.34627e+06	6.43093e+06	6.43305e+06	5.5664e+06
M208T292	208.066	292.361	4-morpholinopropanesulfonic acid	[M-H]-			Organoheterocyclic compounds	Oxazinanes	Morpholines	2.26633e+06	1.63882e+06	1.18747e+06	1.18529e+06	1.44625e+06	3.31358e+06	1.09116e+06	996138	599414	1.12623e+06	1.23381e+06	1.41086e+06	1.52539e+06	1.48719e+06	1.52519e+06
M182T56_2	182.045	55.9717	4-pyridoxic acid	[M-H]-	HMDB0000017	C00847	Organoheterocyclic compounds	Pyridines and derivatives	Pyridinecarboxylic acids and derivatives	1.23007e+08	4.66188e+07	6.42076e+07	8.06988e+06	4.68913e+06	6.08873e+06	1.52171e+07	7.45514e+06	1.9107e+07	9.92414e+06	5.35185e+06	5.90388e+06	3.03121e+07	3.03147e+07	2.99351e+07
M301T66	301.218	66.2821	5,8,11,14-eicosatetraenoic acid, 19-hydroxy-, (5z,8z,11z,14z,19r)-	[M-H-H2O]-			Lipids and lipid-like molecules	Fatty Acyls	Eicosanoids	3.7519e+07	3.70507e+07	1.4284e+07	3.51714e+07	1.47843e+07	1.04737e+07	2.17024e+07	3.57438e+07	3.56576e+07	3.08211e+07	1.15372e+07	4.44753e+07	2.91671e+07	2.91703e+07	2.86565e+07
M255T410	255.074	409.81	5-ethyl-2'-deoxyuridine	[M-H]-			Nucleosides, nucleotides, and analogues	Pyrimidine nucleosides	Pyrimidine 2'-deoxyribonucleosides	4.18628e+06	4.84434e+06	4.37303e+06	4.10696e+06	727523	3.11195e+06	392072	88913.3	7.50626e+06	6.57757e+06	3.81764e+06	3.95514e+06	4.04093e+06	4.03666e+06	3.88297e+06
M181T264	181.025	263.623	5-hydroxyisophthalic acid	[M-H]-			Benzenoids	Benzene and substituted derivatives	Benzoic acids and derivatives	2.83408e+06	3.2547e+06	2.53762e+06	3.23662e+06	2.5235e+06	2.88371e+06	4.15473e+06	4.35881e+06	2.25236e+06	1.96734e+06	1.81908e+06	3.15505e+06	2.72101e+06	2.72102e+06	2.83488e+06
M218T268	218.094	267.798	5-L-Glutamyl-L-alanine	M-	HMDB0006248	C03740	Organic acids and derivatives	Carboxylic acids and derivatives	Amino acids, peptides, and analogues	264233	184493	175177	133737	132761	152472	193889	336441	18036	48025.9	21835.5	23104.6	121302	125704	145896
M177T108	177.092	107.984	5-phenylvaleric acid	[M-H]-	HMDB0002043		Lipids and lipid-like molecules	Fatty Acyls	Fatty acids and conjugates	2.30924e+06	1.77938e+06	2.68344e+06	710094	675160	1.47003e+06	1.66164e+06	1.90563e+06	1.30208e+06	1.04837e+06	3.95415e+06	1.19206e+06	1.57051e+06	1.57049e+06	1.55692e+06
M319T373	319.048	373.144	5'-phosphoribosyl-5-amino-4-imidazolecarboxamide (aicar)	[M-H-H2O]-	HMDB0001517	C04677	Nucleosides, nucleotides, and analogues	Imidazole ribonucleosides and ribonucleotides	1-ribosyl-imidazolecarboxamides	589656	266307	1.15184e+06	870173	674894	382015	1.2057e+06	922691	2.03192e+06	626312	2.20318e+06	196851	1.10626e+06	1.15523e+06	1.11083e+06
M323T114	323.234	114.129	5-(tetradecyloxy)-2-furoic acid	[M-H]-			Organoheterocyclic compounds	Furans	Furoic acid and derivatives	1.00261e+06	998647	566386	173635	381968	72147.7	192841	111769	1.24362e+06	417920	1.01713e+06	4.32868e+06	713970	714362	581957
M441T39	441.251	39.0468	6,8-dihydroxy-2,2,4,4-tetramethyl-7-(3-methylbutanoyl)-9-(2-methylpropyl)-9h-xanthene-1,3-dione	[M-H]-			Organoheterocyclic compounds	Benzopyrans	1-benzopyrans	1.15296e+06	2.15517e+06	1.32226e+06	8.09784e+06	953703	3.22019e+06	2.63485e+06	1.71071e+06	2.30167e+06	1.35531e+06	793137	1.80878e+06	7.53064e+06	7.64647e+06	7.5531e+06
M326T366	326.148	365.621	6-acetylmorphine	[M-H]-		C11781				545718	510435	1.6179e+06	768331	1.25699e+06	813099	1.67638e+06	1.73703e+06	826563	465102	1.24385e+06	172546	827977	879057	879611
M169T109	169.123	109.322	(6e)-8-methyl-6-nonenoic acid	[M-H]-	HMDB0012183		Lipids and lipid-like molecules	Fatty Acyls	Fatty acids and conjugates	4.16436e+06	2.63951e+06	3.28511e+06	2.17708e+06	3.24918e+06	2.8931e+06	4.03147e+06	3.56981e+06	3.86581e+06	3.25602e+06	3.82842e+06	3.01927e+06	3.29308e+06	3.23846e+06	3.23798e+06
M293T66	293.176	66.2821	[6]-gingerol	[M-H]-		C10462	Benzenoids	Phenols	Methoxyphenols	5.60455e+08	1.18008e+09	4.14289e+08	5.00025e+08	5.33025e+08	7.25141e+08	7.21511e+08	5.78548e+08	7.35143e+08	4.4224e+08	5.33158e+08	6.91767e+08	5.48665e+08	5.48657e+08	5.46045e+08
M131T234	131.071	234.376	6-hydroxyhexanoate	[M-H]-	HMDB0012843	C06103	Organic acids and derivatives	Hydroxy acids and derivatives	Medium-chain hydroxy acids and derivatives	4.05726e+07	2.69657e+07	3.26873e+07	3.78892e+07	3.36287e+07	3.25197e+07	8.13417e+07	1.53096e+08	1.03684e+07	1.88191e+07	2.39414e+07	1.51735e+07	3.82012e+07	4.0047e+07	3.82102e+07
M275T373	275.022	373.4	6-phosphogluconic acid	[M-H]-	HMDB0001316	C00345	Organic oxygen compounds	Organooxygen compounds	Carbohydrates and carbohydrate conjugates	3.94052e+06	777080	2.38335e+06	2.8228e+06	103441	290259	1.51955e+07	2.31703e+07	7.55722e+06	1.65187e+06	8.71371e+06	490093	4.41934e+06	4.95671e+06	4.41408e+06
M477T37	477.303	37.1544	7.alpha.,17.alpha.-dimethyl-5.beta.-androstane-3.alpha.,17.beta.-diol glucuronide	[M-H-H2O]-			Lipids and lipid-like molecules	Steroids and steroid derivatives	Steroidal glycosides	422338	587153	496713	1.17241e+06	5.15499e+06	402121	9.99459e+06	9.95369e+06	3.53881e+06	181624	3.53881e+06	212560	9.38479e+06	9.60107e+06	9.6011e+06
M186T301	186.113	301.387	7-keto-8-aminopelargonic acid	[M-H]-		C01092	Lipids and lipid-like molecules	Fatty Acyls	Fatty acids and conjugates	2.31658e+06	3.45753e+06	2.10505e+06	2.1329e+06	1.73785e+06	2.75165e+06	2.31513e+06	2.67556e+06	2.04008e+06	2.42457e+06	2.28744e+06	9.84029e+06	2.84732e+06	2.80358e+06	2.92079e+06
M164T215	164.021	214.939	7-methylguanine	[M-H]-	HMDB0000897	C02242	Organoheterocyclic compounds	Imidazopyrimidines	Purines and purine derivatives	1.173e+07	1.44952e+07	1.3266e+07	1.60644e+07	1.81236e+07	1.84707e+07	1.59433e+07	1.95863e+07	1.31021e+07	1.60612e+07	1.20052e+07	1.8515e+07	1.53524e+07	1.5665e+07	1.5663e+07
M221T66	221.155	66.2821	8,11-tridecadienoic acid, 13-(3-pentyl-2-oxiranyl)-, (8z,11z)-	[M-H-C6H12O]-			Lipids and lipid-like molecules	Fatty Acyls	Fatty acids and conjugates	5.57407e+07	1.23793e+08	4.33476e+07	5.43653e+07	5.81459e+07	7.85739e+07	6.47996e+07	5.78419e+07	7.56712e+07	4.56921e+07	5.74868e+07	7.01586e+07	5.69959e+07	5.82093e+07	5.69954e+07
M301T103	301.218	102.605	8(9)-epoxy-5z,11z,14z-eicosatrienoic acid	[M-H-H2O]-			Lipids and lipid-like molecules	Fatty Acyls	Fatty acids and conjugates	2.12261e+06	1.66451e+06	728830	1.37836e+06	715488	1.13136e+06	480336	1.73483e+06	792636	2.26235e+06	739430	3.30124e+06	1.33814e+06	1.34698e+06	1.50529e+06
M321T65	321.211	65.0992	8-gingerol	[M-H]-		C17495	Benzenoids	Phenols	Methoxyphenols	1.06943e+06	417937	332492	919876	985271	2.48496e+06	589959	1.12556e+06	3.07489e+06	735768	802224	2.02803e+06	1.60318e+07	1.58206e+07	1.60319e+07
M301T86	301.218	85.8726	8s-hydroxy-5z,9e,11z,14z-eicosatetraenoic acid	[M-H-H2O]-	HMDB0004679	C14776	Lipids and lipid-like molecules	Fatty Acyls	Eicosanoids	3.71244e+06	8.55789e+06	1.61634e+06	3.94613e+06	1.41583e+06	1.50781e+06	2.23931e+06	7.24087e+06	3.342e+06	7.53011e+06	1.4463e+06	8.79916e+06	4.37569e+06	3.90451e+06	3.90307e+06
M307T104	307.265	103.616	8z,14z-eicosadienoic acid	[M-H]-			Lipids and lipid-like molecules	Fatty Acyls	Fatty acids and conjugates	1.28196e+06	1.98211e+06	2.15585e+06	627105	619794	703687	1.07812e+06	1.72686e+06	615221	785823	580614	1.99897e+06	1.02944e+06	1.0896e+06	1.19418e+06
M180T51	180.033	51.388	Acamprosate	[M-H]-	HMDB0014797		Organic acids and derivatives	Organic sulfonic acids and derivatives	Organosulfonic acids and derivatives	1.58707e+07	1.66633e+07	9.35855e+06	8.8324e+06	1.512e+07	4.03064e+07	7.55362e+06	1.34889e+07	1.05688e+07	1.24478e+07	1.77736e+07	1.57982e+07	1.94739e+07	1.89499e+07	1.89342e+07
M150T112	150.055	111.549	Acetaminophen	[M-H]-	HMDB0001859	C06804	Benzenoids	Phenols	1-hydroxy-2-unsubstituted benzenoids	951820	829389	706281	1.01224e+06	7.72447e+06	3.57918e+06	3.48291e+06	4.61646e+06	940018	742051	633583	891364	1.34573e+06	1.37462e+06	1.34568e+06
M230T52_2	230.013	51.5034	Acetaminophen sulfate	[M-H]-	HMDB0059911		Organic acids and derivatives	Organic sulfuric acids and derivatives	Arylsulfates	1.72529e+06	904650	5.73277e+06	1.48047e+06	1.48938e+07	1.11809e+07	2.26781e+07	4.47482e+07	4.6942e+06	5.21839e+06	500643	5.21839e+06	6.82665e+06	6.94832e+06	6.94811e+06
M199T48	199.005	47.7619	Acetic acid, 2-(4-chloro-2-methylphenoxy)-	[M-H]-		C18528	Benzenoids	Benzene and substituted derivatives	Phenoxyacetic acid derivatives	1.6522e+06	2.17786e+06	1.50819e+06	1.88792e+06	992491	2.9135e+06	1.4998e+06	4.54284e+06	1.42047e+06	2.12975e+06	1.66912e+06	2.11304e+06	2.79833e+06	3.01071e+06	3.00927e+06
M177T399	176.937	398.648	Acetyl phosphate	(M+K-2H)-	HMDB0001494	C00227	Organic acids and derivatives	Organic phosphoric acids and derivatives	Phosphate esters	1.18539e+08	1.1143e+08	6.4208e+07	1.20436e+08	5.79783e+07	6.9911e+07	9.12167e+07	1.23809e+08	4.26314e+07	5.61713e+07	3.74271e+07	4.53769e+07	7.25941e+07	7.5455e+07	7.54501e+07
M134T293_2	134.046	293.404	Adenine	[M-H]-	HMDB0000034	C00147	Organoheterocyclic compounds	Imidazopyrimidines	Purines and purine derivatives	4.98355e+07	5.23265e+07	4.74779e+07	5.34706e+07	6.29623e+07	6.69723e+07	7.14134e+07	8.81261e+07	3.90582e+07	5.68026e+07	4.23097e+07	5.41846e+07	5.31879e+07	5.18795e+07	5.31698e+07
M426T394	426.023	393.669	Adenosine 5'-diphosphate	[M-H]-	HMDB0001341	C00008	Nucleosides, nucleotides, and analogues	Purine nucleotides	Purine ribonucleotides	1.27732e+07	1.91187e+07	1.20171e+07	1.36805e+06	8.91065e+06	1.17806e+07	1.669e+07	1.611e+07	5.71782e+06	1.77696e+07	9.80371e+06	1.20967e+07	1.20118e+07	1.15061e+07	1.17287e+07
M558T377	558.065	376.898	Adenosine 5'-diphosphoribose	[M-H]-	HMDB0001178	C00301	Nucleosides, nucleotides, and analogues	Purine nucleotides	Purine nucleotide sugars	2.91873e+07	3.3703e+07	3.5659e+07	2.30872e+07	2.59788e+07	3.54006e+07	2.89526e+07	6.48003e+07	2.67085e+07	3.35374e+07	2.44008e+07	2.15636e+07	3.13258e+07	3.13314e+07	3.07901e+07
M444T383	444.026	383.465	Adenosine 5'-phosphosulfate	[M+OH]-	HMDB0001003	C00224	Nucleosides, nucleotides, and analogues	Purine nucleotides	Purine ribonucleotides	445766	472885	934362	627354	1.40602e+06	420490	1.09933e+06	3.98823e+06	830150	679335	773013	393512	1.11114e+06	1.022e+06	1.10993e+06
M145T364	145.05	364.012	Adipic acid	[M-H]-	HMDB0000448	C06104	Lipids and lipid-like molecules	Fatty Acyls	Fatty acids and conjugates	2.13109e+06	3.17229e+06	2.5864e+06	2.44793e+06	2.82964e+06	3.30175e+06	2.70917e+06	2.92281e+06	2.86702e+06	3.30259e+06	2.59789e+06	2.9355e+06	3.09257e+06	3.05483e+06	3.05479e+06
M159T354	159.065	354.19	Ala-Ala	[M-H]-	HMDB0000303	C00398	Organoheterocyclic compounds	Indoles and derivatives	Tryptamines and derivatives	455711	362554	299241	239045	1.57566e+06	1.2132e+06	1.79899e+06	1.29449e+06	200467	260914	202526	160465	441308	413411	413569
M244T519	244.142	518.87	Ala-Arg	[M-H]-			Organic acids and derivatives	Carboxylic acids and derivatives	Amino acids, peptides, and analogues	1.01701e+06	1.28543e+06	3.31954e+06	2.15127e+06	1.07353e+06	3.10991e+06	1.96528e+06	1.64534e+06	1.37021e+06	734043	3.61346e+06	687529	1.5746e+06	1.57525e+06	1.50478e+06
M202T375	202.083	375.218	Ala-Asn	[M-H]-			Organic acids and derivatives	Carboxylic acids and derivatives	Amino acids, peptides, and analogues	8.46917e+06	1.11458e+07	6.02017e+06	7.52801e+06	1.19367e+06	7.99663e+06	952489	1.15973e+06	8.70514e+06	1.22121e+07	4.06741e+06	1.51389e+07	5.96388e+06	5.96099e+06	5.80574e+06
M203T379	203.067	379.038	Ala-asp	[M-H]-			Organic acids and derivatives	Peptidomimetics	Hybrid peptides	5.97576e+06	4.54573e+06	7.4887e+06	3.67889e+06	4.67459e+06	4.03857e+06	5.82242e+06	9.53493e+06	2.50688e+06	3.01499e+06	2.50193e+06	2.51533e+06	5.3789e+06	5.44333e+06	5.44325e+06
M216T362	216.099	362.155	Ala-Gln	[M-H]-			Organic acids and derivatives	Carboxylic acids and derivatives	Amino acids, peptides, and analogues	6.09065e+06	8.28747e+06	9.15421e+06	7.46481e+06	1.11474e+07	7.70542e+06	6.81607e+06	3.91434e+06	7.15854e+06	4.95207e+06	9.44958e+06	5.05757e+06	7.7642e+06	8.01458e+06	7.76196e+06
M225T233	225.113	233.455	Ala-His	[M-H]-			Organic acids and derivatives	Carboxylic acids and derivatives	Amino acids, peptides, and analogues	2.77834e+07	1.84846e+07	1.65151e+07	1.6124e+07	2.05681e+07	1.73801e+07	3.71091e+07	1.22054e+07	1.79806e+07	2.13419e+07	2.19813e+07	2.64557e+07	1.85904e+07	1.87696e+07	1.87703e+07
M303T48	303.2	48.1461	Aleuritic acid	[M-H]-			Lipids and lipid-like molecules	Fatty Acyls	Fatty acids and conjugates	2.05935e+06	1.18165e+06	1.22056e+06	2.2724e+06	3.55911e+06	4.0148e+06	1.05014e+07	4.26792e+06	2.84327e+06	1.13499e+06	1.51611e+06	5.65507e+06	3.24039e+07	3.18051e+07	3.17976e+07
M159T376	159.01	375.574	Alloxan	[M+OH]-	HMDB0002818		Organoheterocyclic compounds	Diazines	Pyrimidines and pyrimidine derivatives	1.14997e+06	1.50372e+06	1.38233e+06	2.1178e+06	740916	718072	1.44719e+06	1.38313e+06	1.42392e+06	1.34321e+06	1.65666e+06	1.94983e+06	1.34878e+06	1.22514e+06	1.21763e+06
M269T66	269.214	66.0281	All-trans-4-ketoretinoic acid	[M-H-CO2]-	HMDB0006285		Lipids and lipid-like molecules	Prenol lipids	Retinoids	9.25288e+06	1.07289e+07	3.57597e+06	4.72722e+06	1.04216e+07	3.06883e+06	1.75622e+07	983900	9.27787e+06	7.59588e+06	5.37742e+06	8.85365e+06	7.32444e+06	7.30046e+06	7.27868e+06
M98T276	98.0237	276.305	Allyl isothiocyanate	[M-H]-	HMDB0005843	C19317				3.89725e+07	3.21461e+07	5.3758e+07	3.41617e+07	5.63252e+07	3.97085e+07	2.1059e+08	1.97389e+08	2.07804e+07	1.8605e+07	1.69337e+07	2.63356e+07	5.4571e+07	5.30266e+07	5.30065e+07
M168T114	168.102	114.204	(-)-.alpha.-kainic acid	[M-H-CO2]-	HMDB0001431	C12819	Organic acids and derivatives	Carboxylic acids and derivatives	Amino acids, peptides, and analogues	2.45041e+07	2.15454e+07	3.15867e+07	1.13423e+07	1.58284e+07	3.07181e+07	2.66926e+07	4.52819e+07	4.4919e+07	4.41533e+07	4.37463e+07	2.44977e+07	1.19701e+07	1.19003e+07	1.19003e+07
M429T60	429.375	59.9978	alpha-Tocopherol (Vitamin E)	[M-H]-	HMDB0001893	C02477	Lipids and lipid-like molecules	Prenol lipids	Quinone and hydroquinone lipids	7.79842e+06	4.95941e+06	5.33488e+06	7.51496e+06	8.12414e+06	3.61562e+06	1.38919e+07	7.99708e+06	5.18343e+06	6.00887e+06	9.51918e+06	9.06934e+06	5.01169e+06	5.13558e+06	5.13455e+06
M473T41	473.283	40.5304	Amastatin	[M-H]-			Organic acids and derivatives	Peptidomimetics	Hybrid peptides	2.44153e+06	2.48212e+06	2.93963e+06	2.1096e+06	517042	1.61587e+06	1.38787e+06	2.29359e+06	1.78384e+06	1.6222e+06	1.2107e+06	2.54917e+06	2.65392e+06	2.65573e+06	2.61043e+06
M221T319	221.012	319.362	Aminomethylphosphonic acid	[2M-H]-		C11033	Organic acids and derivatives	Organic phosphonic acids and derivatives	Organic phosphonic acids	9.33515e+07	1.05357e+08	8.89897e+07	1.00354e+08	8.50192e+07	1.12655e+08	9.66129e+07	6.94885e+07	9.37952e+07	7.49675e+07	9.44501e+07	8.46487e+07	9.98503e+07	9.60179e+07	9.63192e+07
M147T339_2	147.066	338.635	Anethole	[M-H]-	HMDB0030837	C10428	Benzenoids	Phenol ethers	Anisoles	262136	873214	347334	176199	56035.2	353420	275391	1.0379e+06	218071	204242	420508	379731	477135	477110	482311
M172T36	172.017	35.5316	Aniline	[M-H]-	HMDB0003012	C00292	Benzenoids	Benzene and substituted derivatives	Aniline and substituted anilines	1.11618e+06	3.63322e+06	4.34171e+06	3.69451e+06	1.3569e+07	4.79776e+06	744876	97548.2	4.10837e+06	1.91371e+06	7.04509e+06	1.4578e+06	4.75196e+06	4.78201e+06	4.38931e+06
M303T66	303.233	66.248	Arachidonic acid (peroxide free)	[M-H]-	HMDB0001043	C00219	Lipids and lipid-like molecules	Fatty Acyls	Fatty acids and conjugates	2.7772e+09	3.47599e+09	1.61784e+09	1.55858e+09	1.40252e+09	6.71358e+08	2.60223e+09	3.43484e+09	2.03166e+09	1.67998e+09	1.11132e+09	3.5942e+09	2.35958e+09	2.37024e+09	2.35953e+09
M305T951	304.979	950.607	Benzoic acid, 2-[(2-bromophenyl)methoxy]-	[M-H]-			Benzenoids	Benzene and substituted derivatives	Benzoic acids and derivatives	3.12323e+06	1.39515e+06	2.16703e+06	2.34975e+06	2.54301e+06	2.42457e+06	2.32982e+06	2.04999e+06	1.47007e+06	2.30713e+06	1.99292e+06	2.41744e+06	1.67529e+06	1.46968e+06	1.44488e+06
M201T36	201.022	35.7997	Bergaptol	[M-H]-	HMDB0013679	C00758	Phenylpropanoids and polyketides	Coumarins and derivatives	Furanocoumarins	2.65061e+07	1.35433e+07	2.15808e+07	1.18723e+07	9.83843e+06	1.35971e+07	195638	1.21173e+06	1.35971e+07	1.35971e+07	1.35971e+07	1.35971e+07	6.93925e+06	7.36002e+06	7.37768e+06
M88T404	88.0399	404.241	Beta-alanine	[M-H]-	HMDB0000056	C00099	Organic acids and derivatives	Carboxylic acids and derivatives	Amino acids, peptides, and analogues	1.76645e+07	1.30496e+07	1.56451e+07	1.90928e+07	1.48481e+07	1.40788e+07	1.73675e+07	1.68178e+07	1.59986e+07	1.64548e+07	1.64213e+07	1.54836e+07	1.82916e+07	1.93838e+07	1.83017e+07
M113T378	113.055	378.358	.beta.-cyano-l-alanine	[M-H]-	HMDB0060245	C02512	Organic acids and derivatives	Carboxylic acids and derivatives	Amino acids, peptides, and analogues	1.04354e+07	1.08847e+07	1.07686e+07	1.17553e+07	1.22482e+07	1.09846e+07	9.35983e+06	9.44957e+06	1.08162e+07	1.11425e+07	1.09761e+07	8.58951e+06	1.14084e+07	1.11228e+07	1.12192e+07
M171T178	171.102	177.708	.beta.-glycerophosphate	[M-H]-	HMDB0002520	C02979	Lipids and lipid-like molecules	Glycerophospholipids	Glycerophosphates	2.2592e+06	3.10877e+06	2.56436e+06	2.24544e+06	2.28529e+06	3.71083e+06	3.72807e+06	4.15409e+06	3.94993e+06	2.53647e+06	2.74931e+06	2.29011e+06	2.86583e+06	2.64873e+06	2.64611e+06
M117T246	117.055	245.602	Beta-n-methylaminoalanine	[M-H]-		C08291	Organic acids and derivatives	Carboxylic acids and derivatives	Amino acids, peptides, and analogues	2.63739e+07	2.56375e+07	2.45176e+07	2.3284e+07	2.31615e+07	2.56019e+07	2.29777e+07	6.30217e+07	2.30846e+07	3.13356e+07	3.21959e+07	2.7379e+07	3.0196e+07	2.6548e+07	3.00851e+07
M137T389	136.964	389.335	Brugierol (not validated)	[M-H]-			Organoheterocyclic compounds	Dithiolanes	1,2-dithiolanes	4.29347e+07	4.97189e+07	2.39611e+07	4.66031e+07	3.74097e+07	5.14688e+07	4.00099e+07	8.08063e+07	2.72241e+07	3.63577e+07	2.47546e+07	3.56058e+07	4.227e+07	4.05647e+07	4.05599e+07
M227T354	227.067	354.072	Butyric acid, 4-[(4-chloro-o-tolyl)oxy]-	[M-H]-		C18529				1.07048e+06	961995	910025	779500	272782	567861	4.00587e+06	1.13399e+06	727953	309108	715508	618401	1.01664e+06	1.01661e+06	968715
M191T302	191.094	302.416	Cannabigerol	[M-H-C9H16]-		C20219	Lipids and lipid-like molecules	Prenol lipids	Monoterpenoids	7.07249e+06	7.42823e+06	5.53795e+06	6.97902e+06	6.21162e+06	6.41095e+06	1.01965e+07	1.00913e+07	4.61769e+06	4.54836e+06	4.73378e+06	6.50796e+06	6.55201e+06	6.55209e+06	6.66934e+06
M171T67	171.139	66.94	Capric acid	[M-H]-	HMDB0000511	C01571	Lipids and lipid-like molecules	Fatty Acyls	Fatty acids and conjugates	3.50902e+07	3.96059e+07	3.84356e+07	4.40732e+07	3.954e+07	5.49324e+07	3.34133e+07	2.95361e+07	3.77022e+07	3.57665e+07	3.15457e+07	3.28085e+07	3.87887e+07	3.87828e+07	3.81047e+07
M143T225	143.107	224.668	Caprylic acid	(M-H)-	HMDB0000482/HMDB0062511	C06423	Lipids and lipid-like molecules	Fatty Acyls	Fatty acids and conjugates	3.15792e+06	2.7897e+06	2.66724e+06	1.493e+06	2.27315e+06	2.44158e+06	1.4415e+07	5.32099e+06	2.08617e+06	7.03692e+06	2.31611e+06	6.63236e+06	3.3711e+06	3.38204e+06	3.15561e+06
M354T387	354.062	387.204	Celastramycin a	[M-H-HCl+2i]-			Organic oxygen compounds	Organooxygen compounds	Carbonyl compounds	5.39738e+06	5.42292e+06	4.83307e+06	3.83011e+06	1.55871e+06	2.30605e+06	2.7438e+07	6.00253e+06	2.99259e+06	2.55065e+06	3.37055e+06	2.82415e+06	4.61425e+06	4.7282e+06	4.61477e+06
M353T361	353.09	360.812	Chlorogenic acid	[M-H]-	HMDB0003164	C00852	Organic oxygen compounds	Organooxygen compounds	Alcohols and polyols	2.76172e+06	2.53258e+06	4.25303e+06	2.09425e+06	1.0326e+07	4.64418e+06	7.02422e+06	1.35155e+06	1.78017e+06	1.33211e+06	2.38188e+06	948748	3.5603e+06	3.40938e+06	3.37387e+06
M143T265	142.998	265.21	Chlorohydroquinone	[M-H]-		C06601	Benzenoids	Phenols	1,4-dihydroxy-2-halobenzenoids	2.12905e+06	2.49149e+06	5.82709e+06	3.48831e+06	7.05177e+06	3.26388e+06	2.20416e+07	3.01075e+06	1.9417e+06	1.51309e+06	5.08377e+06	682264	3.09821e+06	2.92474e+06	3.10557e+06
M217T35	217.052	34.7507	Chlorophene	[M-H]-	HMDB0004995	C06174	Benzenoids	Benzene and substituted derivatives	Diphenylmethanes	3.14834e+06	6.87097e+06	1.76786e+07	3.59985e+07	8.93816e+07	4.89914e+07	2.61769e+06	1.27133e+07	2.7558e+07	4.20392e+06	3.92926e+07	3.86596e+06	1.32165e+07	1.37468e+07	1.27931e+07
M465T37	465.303	36.9053	Cholesteryl sulfate	[M-H]-	HMDB0000653	C18043	Lipids and lipid-like molecules	Steroids and steroid derivatives	Cholestane steroids	1.18761e+08	7.93871e+07	9.07932e+07	1.64165e+08	1.15024e+08	1.03304e+08	3.87552e+08	5.65444e+08	6.99414e+07	8.25443e+07	8.77089e+07	7.3469e+07	1.36812e+08	1.36845e+08	1.40477e+08
M407T39	407.261	38.9192	Cholic acid	[M-H]-	HMDB0000619	C00695	Lipids and lipid-like molecules	Steroids and steroid derivatives	Bile acids, alcohols and derivatives	344297	441981	1.91229e+06	805444	2.46701e+06	1.91229e+06	1.94797e+06	770605	1.91229e+06	151908	180143	472206	4.35623e+06	4.35543e+06	4.66285e+06
M339T66_1	339.136	66.0281	Cilastatin	[M-H-H2O]-	HMDB0015535	C01675	Organic acids and derivatives	Carboxylic acids and derivatives	Amino acids, peptides, and analogues	5.58938e+06	3.3132e+06	6.43651e+06	3.39875e+06	4.5921e+06	4.94986e+06	2.38843e+07	2.17469e+07	360087	744679	192522	287685	4.6626e+06	4.49177e+06	4.48684e+06
M293T36	293.179	35.8618	Cinchonine	[M-H]-	HMDB0030282	C06528				4.21827e+07	5.47965e+07	2.73934e+07	6.47506e+07	4.29149e+07	4.4256e+07	5.5949e+07	3.31976e+07	4.19637e+07	3.3262e+07	3.26416e+07	3.26193e+07	5.55403e+07	5.68821e+07	5.55531e+07
M327T66	327.233	66.248	Cis-4,7,10,13,16,19-docosahexaenoic acid	[M-H]-	HMDB0002183	C06429	Lipids and lipid-like molecules	Fatty Acyls	Fatty acids and conjugates	2.93333e+08	3.739e+08	1.25619e+08	1.49893e+08	9.01232e+07	3.85919e+07	8.35848e+07	1.25397e+08	1.91201e+08	2.00689e+08	1.27442e+08	4.42727e+08	2.06608e+08	2.06614e+08	2.08351e+08
M331T104	331.265	104.091	Cis-7,10,13,16-docosatetraenoic acid	[M-H]-	HMDB0002226	C16527	Lipids and lipid-like molecules	Fatty Acyls	Fatty acids and conjugates	3.28529e+06	2.13038e+06	7.39843e+06	1.4123e+06	1.27425e+06	1.73291e+06	2.82412e+06	2.01623e+06	1.61396e+06	2.06305e+06	1.2093e+06	3.40183e+06	3.11546e+06	3.43263e+06	3.20146e+06
M253T67	253.217	66.94	Cis-9-palmitoleic acid	[M-H]-	HMDB0003229	C08362	Lipids and lipid-like molecules	Fatty Acyls	Fatty acids and conjugates	2.57206e+07	4.77852e+07	3.26687e+07	5.6927e+07	4.23657e+07	4.30375e+07	3.99824e+07	2.49537e+07	8.8763e+07	7.83907e+07	1.38792e+08	1.21752e+08	5.99457e+07	6.1633e+07	5.99228e+07
M129T409	129.019	409.293	Cis-aconitate	[M-H-CO2]-	HMDB0000072	C00417	Organic acids and derivatives	Carboxylic acids and derivatives	Tricarboxylic acids and derivatives	2.02731e+06	1.3832e+06	1.44237e+06	1.5129e+06	2.07283e+06	1.17251e+06	4.13951e+06	7.30723e+06	1.21219e+06	1.07027e+06	1.68808e+06	891993	2.12568e+06	2.11959e+06	2.20507e+06
M141T453_3	141.016	452.765	Cis,cis-muconic acid	[M-H]-	HMDB0006331	C02480	Lipids and lipid-like molecules	Fatty Acyls	Fatty acids and conjugates	4.98362e+08	6.14541e+08	5.68309e+08	7.14229e+08	5.90894e+08	4.84373e+08	7.53228e+08	7.5914e+08	6.46398e+08	5.66518e+08	8.13791e+08	4.26987e+08	6.22303e+08	6.2024e+08	6.22314e+08
M191T398	191.02	397.685	Citrate	[M-H]-	HMDB0000094	C00158	Organic acids and derivatives	Carboxylic acids and derivatives	Tricarboxylic acids and derivatives	8.1432e+07	4.40384e+07	4.00318e+07	4.97221e+07	3.07776e+07	2.16683e+07	1.27445e+08	2.03748e+08	2.29457e+07	4.99756e+07	3.68064e+07	2.24038e+07	6.88192e+07	6.68475e+07	6.88006e+07
M162T85	162.055	84.5628	Coniferyl aldehyde	[M-H-CH3]-	HMDB0141782	C02666	Benzenoids	Phenols	Methoxyphenols	4.1682e+06	6.03241e+06	9.571e+06	1.29119e+07	5.73128e+06	6.85861e+06	1.45738e+07	5.09383e+06	49551.3	849970	1.69473e+06	531656	6.78084e+06	7.38126e+06	6.63768e+06
M367T362	367.106	362.12	Curcumin	[M-H]-	HMDB0002269	C10443	Phenylpropanoids and polyketides	Diarylheptanoids	Linear diarylheptanoids	1.93993e+08	2.83331e+08	4.39645e+08	3.45127e+08	4.38558e+08	3.11969e+08	9.09453e+07	477180	4.31323e+08	3.07489e+08	5.06226e+08	2.09773e+08	3.13111e+08	3.16804e+08	3.12323e+08
M540T390	540.054	390.272	Cyclic adenosine diphosphate ribose	[M-H]-		C13050	Organic oxygen compounds	Organooxygen compounds	Carbohydrates and carbohydrate conjugates	1.36731e+07	1.95355e+07	3.07073e+07	3.63676e+07	6.16138e+07	2.38986e+07	4.29253e+07	3.37481e+07	1.49227e+07	1.58764e+07	3.62616e+07	6.15836e+06	2.58867e+07	2.58865e+07	2.55661e+07
M178T66	178.053	65.9339	Cyclohexanesulfamic acid	[M-H]-	HMDB0031340	C02824	Organic acids and derivatives	Sulfamic acid derivatives	Cyclamates	3.88381e+06	2.07609e+07	680002	4.44769e+06	1.69179e+07	6.99369e+06	3.27667e+07	4.84932e+06	365851	461087	2.4471e+06	145561	6.39925e+06	6.39811e+06	6.52079e+06
M101T308	101.023	308.044	Cycloserine	[M-H]-	HMDB0014405	C08057	Organic acids and derivatives	Carboxylic acids and derivatives	Amino acids, peptides, and analogues	3.81545e+06	3.31618e+06	5.27159e+06	2.86596e+06	5.51428e+06	4.95716e+06	1.43287e+07	1.07368e+07	2.83446e+06	2.60401e+06	2.77371e+06	2.99631e+06	5.26358e+06	5.26623e+06	5.45895e+06
M248T225	248.08	224.646	Cys-Gln	[M-H]-			Organic acids and derivatives	Carboxylic acids and derivatives	Amino acids, peptides, and analogues	7.36487e+06	1.05352e+07	7.04328e+06	7.5967e+06	6.70826e+06	1.47023e+07	9.65506e+06	8.79582e+06	1.05791e+07	8.70111e+06	8.0308e+06	1.00851e+07	1.11402e+07	1.09299e+07	1.11376e+07
M120T213	120.019	213.291	Cysteine	[M-H]-	HMDB0000574	C00097	Organic acids and derivatives	Carboxylic acids and derivatives	Amino acids, peptides, and analogues	5.71395e+06	6.19787e+06	4.73307e+06	6.20915e+06	2.64591e+06	4.4426e+06	4.01494e+06	5.12157e+06	5.50055e+06	6.18723e+06	3.21473e+06	6.47789e+06	5.40759e+06	5.33792e+06	5.40761e+06
M242T389	242.08	389.402	Cytidine	[M-H]-	HMDB0000089	C00475	Nucleosides, nucleotides, and analogues	Pyrimidine nucleosides		1.00259e+07	5.10551e+06	5.07656e+06	2.80898e+06	4.71496e+06	2.25068e+06	1.56923e+08	2.69014e+07	1.94107e+06	1.47428e+06	2.19456e+06	2.18246e+06	1.71818e+07	1.76077e+07	1.71797e+07
M322T394	322.045	394.196	Cytidine 5'-monophosphate	[M-H]-	HMDB0000095	C00055	Nucleosides, nucleotides, and analogues	Pyrimidine nucleotides	Pyrimidine ribonucleotides	5.65258e+06	5.01271e+06	7.36157e+06	4.4076e+06	6.14184e+06	5.98938e+06	6.86885e+06	5.07979e+06	3.23622e+06	3.74977e+06	5.3587e+06	2.06026e+06	5.10857e+06	5.10811e+06	5.22086e+06
M102T376	102.055	376.072	D-2-aminobutyric acid	[M-H]-	HMDB0000452	C02261	Organic acids and derivatives	Carboxylic acids and derivatives	Amino acids, peptides, and analogues	2.15002e+07	2.31983e+07	4.59471e+07	2.1777e+07	5.72562e+07	3.46162e+07	7.97767e+07	5.76558e+07	9.41103e+06	1.23374e+07	1.53011e+07	1.27192e+07	3.44352e+07	3.44396e+07	3.37415e+07
M167T921	166.983	921.024	D-2-phosphoglyceric acid	[M-H-H2O]-	HMDB0003391	C00197	Organic oxygen compounds	Organooxygen compounds	Carbohydrates and carbohydrate conjugates	5.61489e+07	4.09533e+07	3.73026e+07	1.01313e+08	8.963e+07	5.35609e+07	3.46832e+07	6.61635e+07	8.49267e+07	5.28484e+07	7.6655e+07	8.97537e+07	6.71223e+07	6.09099e+07	6.70581e+07
M333T46	333.008	46.4476	Daidzein 4'-sulfate	[M-H]-			Phenylpropanoids and polyketides	Isoflavonoids	Isoflav-2-enes	93501.1	862547	3.27813e+06	932390	1.01068e+06	916522	752584	6.65595e+06	916522	916522	916522	916522	401133	448279	399674
M219T311	219.1	310.702	D-Alanyl-D-alanine (D-Ala-D-Ala)	(M+CH3COO)-	HMDB0003459	C00993	Organic acids and derivatives	Carboxylic acids and derivatives	Amino acids, peptides, and analogues	186478	140747	58023.6	109583	118359	113726	182214	168651	18056.5	88758.3	45265.9	182978	107954	133093	130928
M165T361	165.04	361.058	D-arabinonic acid	[M-H]-	HMDB0000539	C00878	Organic oxygen compounds	Organooxygen compounds	Carbohydrates and carbohydrate conjugates	2.0398e+07	2.2176e+07	4.97352e+07	2.38111e+07	1.22747e+08	5.47336e+07	4.91087e+07	9.12222e+06	1.79777e+07	1.57082e+07	3.67634e+07	9.10363e+06	3.33417e+07	3.42872e+07	3.33382e+07
M113T275	113.023	275.075	D-arabinose	[M-H-2H2O]-	HMDB0029942	C00259	Organic oxygen compounds	Organooxygen compounds	Carbohydrates and carbohydrate conjugates	1.25855e+07	2.59027e+07	4.9017e+07	4.10971e+07	3.88549e+07	3.61071e+07	1.34176e+07	793497	4.50628e+07	2.4558e+07	4.62367e+07	1.92088e+07	3.28875e+07	3.28604e+07	3.1791e+07
M417T41	417.211	40.8495	Dauricine	[M-H-C12H16O2N]-		C09419	Organoheterocyclic compounds	Isoquinolines and derivatives	Benzylisoquinolines	240450	2.98991e+06	624652	1.75708e+06	396778	2.94142e+06	2.91921e+06	1.90194e+06	3.82617e+06	1.68589e+06	1.55484e+06	2.3379e+06	2.0122e+06	2.10005e+06	2.09399e+06
M173T265	173.008	264.695	Dehydroascorbic acid	[M-H]-	HMDB0001264	C00425	Organoheterocyclic compounds	Lactones	Gamma butyrolactones	1.82847e+06	1.47088e+06	3.9728e+06	2.75301e+06	4.87624e+06	1.78117e+06	7.46093e+06	2.53363e+06	1.24106e+06	571085	3.44831e+06	679008	2.20302e+06	2.10695e+06	2.10782e+06
M173T243	173.006	243.235	Dehydroascorbic acid (Oxidized vitamin C)	(M-H)-		C05422				704017	1.39903e+06	1.77225e+06	1.1841e+06	1.84961e+06	1.25009e+06	1.63047e+06	884836	905594	757501	1.14933e+06	286684	1.30715e+06	1.30717e+06	1.27026e+06
M367T38	367.231	37.7975	.delta.17-6-ketoprostaglandin f1.alpha.	[M-H]-			Lipids and lipid-like molecules	Fatty Acyls	Eicosanoids	334819	558363	2.87582e+06	1.33413e+06	3.21094e+06	2.87582e+06	1.12641e+06	641471	550204	986446	418192	1.96591e+06	6.41291e+06	7.64483e+06	7.64249e+06
M465T34	465.341	33.6649	Deoxycholic acid methyl ester	[M+CH3COOH-H]-			Lipids and lipid-like molecules	Steroids and steroid derivatives	Bile acids, alcohols and derivatives	4.80978e+06	1.6071e+06	1.54092e+07	1.96009e+07	2.31385e+07	3.82033e+06	1.77427e+06	9.17655e+07	6.84958e+06	1.55375e+07	1.67431e+06	1.88886e+07	7.97691e+06	9.90283e+06	8.04523e+06
M251T43	251.096	42.752	Deoxyinosine	[M-H]-	HMDB0000071	C05512	Nucleosides, nucleotides, and analogues	Purine nucleosides	Purine 2'-deoxyribonucleosides	683031	685124	647269	886093	589560	1.18515e+06	354560	1.12058e+06	200723	6.06641e+06	1.12834e+06	1.12071e+06	1.27378e+06	1.32312e+06	1.27285e+06
M321T373	321.063	373.4	Deoxythymidine 5'-phosphate (dTMP)	[M-H]-	HMDB0001227	C00364	Nucleosides, nucleotides, and analogues	Pyrimidine nucleotides	Pyrimidine deoxyribonucleotides	3.19323e+06	1.65121e+06	4.11615e+06	3.70093e+06	3.0035e+06	1.51045e+06	3.01717e+06	550975	5.72904e+06	2.34703e+06	6.71941e+06	1.34623e+06	3.92272e+06	4.02526e+06	3.96082e+06
M199T392	199.001	392.256	D-erythrose 4-phosphate	[M-H]-	HMDB0001321	C00279	Organic oxygen compounds	Organooxygen compounds	Carbohydrates and carbohydrate conjugates	2.61658e+06	8.84482e+06	3.38704e+07	1.33112e+07	3.84502e+07	2.37519e+07	974022	1.39415e+06	3.44635e+07	2.95783e+07	4.32756e+07	1.05282e+07	2.26345e+07	2.26887e+07	2.26344e+07
M179T402	179.057	402.039	D-fructose	[M-H]-	HMDB0062538	C00095	Organic oxygen compounds	Organooxygen compounds	Carbohydrates and carbohydrate conjugates	2.39812e+07	1.67746e+07	2.07456e+07	1.68543e+07	2.68977e+07	1.94735e+07	4.09416e+07	4.28274e+07	1.03196e+07	1.01119e+07	1.48251e+07	6.68053e+06	2.01936e+07	2.06604e+07	2.07517e+07
M399T392	399.011	392.254	D-Fructose 1,6-bisphosphate	(M+CH3COO)-		C00354				5.34787e+06	8.73062e+06	2.48127e+07	1.32625e+07	2.9743e+07	1.74406e+07	967152	5.27783e+06	2.84093e+07	2.3622e+07	3.51066e+07	7.04873e+06	1.91492e+07	1.915e+07	1.88284e+07
M519T395	519.053	395.01	D-fructose 6-phosphate	[2M-H]-	HMDB0000124	C00085	Organic oxygen compounds	Organooxygen compounds	Carbohydrates and carbohydrate conjugates	212207	6.53126e+06	8.04388e+07	1.51836e+07	1.06543e+08	3.39382e+07	4.17076e+07	144717	8.3609e+07	4.73005e+07	1.86405e+08	5.74314e+06	3.48089e+07	3.43931e+07	3.44605e+07
M215T259	215.014	258.654	D-(+)-galactose	[M+Cl]-	HMDB0033704	C00124	Organic oxygen compounds	Organooxygen compounds	Carbohydrates and carbohydrate conjugates	2.28607e+07	3.06133e+07	4.12957e+07	3.41351e+07	3.79694e+07	2.8008e+07	1.52422e+07	1.4499e+06	3.19569e+07	3.20693e+07	4.61108e+07	2.36765e+07	3.10791e+07	3.10814e+07	2.99377e+07
M113T362	113.023	361.825	D-galacturonic acid	[M-H-CH4O4]-	HMDB0002545	C00333	Organic oxygen compounds	Organooxygen compounds	Carbohydrates and carbohydrate conjugates	1.04416e+07	1.33205e+07	2.26449e+07	1.71954e+07	2.38831e+07	1.76693e+07	6.83315e+06	684566	2.09546e+07	1.35827e+07	2.50265e+07	1.03787e+07	1.59254e+07	1.60154e+07	1.59257e+07
M195T376	195.051	376.331	D-gluconate	[M-H]-	HMDB0000625	C00257	Organic oxygen compounds	Organooxygen compounds	Carbohydrates and carbohydrate conjugates	3.56539e+06	6.4289e+06	8.36003e+06	5.99953e+06	1.53473e+07	1.05847e+07	7.002e+06	5.45204e+06	3.54422e+06	4.77916e+06	4.8979e+06	3.85281e+06	6.32429e+06	6.32518e+06	6.24433e+06
M258T58	258.009	58.2216	D-glucosamine, 6-sulfate	[M-H]-			Organic oxygen compounds	Organooxygen compounds	Carbohydrates and carbohydrate conjugates	1.76336e+06	1.42688e+06	5.15436e+06	3.3391e+06	2.50588e+06	2.47776e+06	6.78888e+06	1.0323e+07	525320	599390	918310	72354.8	2.68134e+06	2.76402e+06	2.76375e+06
M235T297	234.956	296.681	Dichlorprop	[M-H+2i]-		C11020	Benzenoids	Benzene and substituted derivatives	2-phenoxypropionic acids	103699	1.38299e+06	637686	547679	298883	222731	974880	2.3562e+06	470225	885301	361524	487148	642410	550431	580467
M309T387	309.04	387.001	Digalacturonic acid	[M-H-C2H4O2]-		C02273				3.28016e+06	1.81997e+06	1.5428e+06	1.92549e+06	315076	801867	4.62905e+06	2.18849e+06	1.15976e+07	738461	6.62721e+06	2.83473e+06	1.97459e+06	1.98779e+06	1.99335e+06
M127T382	127.05	382.317	Dihydro-4,4-dimethyl-2,3-furandione	[M-H]-		C01125	Organoheterocyclic compounds	Lactones	Gamma butyrolactones	1.48491e+07	1.46523e+07	1.33073e+07	1.07938e+07	1.67923e+07	1.25062e+07	2.1957e+07	2.98894e+07	2.57436e+06	8.55398e+06	6.39776e+06	3.90887e+06	1.26671e+07	1.27195e+07	1.27196e+07
M169T391	168.99	391.153	Dihydroxyacetone phosphate	[M-H]-	HMDB0001473	C00111	Organic oxygen compounds	Organooxygen compounds	Carbohydrates and carbohydrate conjugates	9.22257e+06	1.97514e+07	3.08869e+07	4.03243e+07	3.96835e+07	1.93381e+07	5.32617e+06	1.53725e+07	2.91132e+07	1.75733e+07	3.53128e+07	8.58533e+06	2.40177e+07	2.3622e+07	2.36215e+07
M320T375	320.067	374.577	Dimethenamid ethanesulfonic acid	[M-H]-						641131	524343	882761	770567	647649	372207	1.61535e+06	338988	1.24504e+06	517695	1.44442e+06	361667	982369	1.00469e+06	982784
M287T921	286.917	921.105	Disul	[M-H+2i]-		C19071	Benzenoids	Benzene and substituted derivatives	Halobenzenes	811204	2.04622e+06	1.64553e+06	1.32179e+06	1.21642e+06	1.5549e+06	2.10942e+06	1.45627e+06	1.44101e+06	2.51907e+06	1.75243e+06	1.99692e+06	1.93993e+06	1.67149e+06	1.73087e+06
M169T346	169.061	345.517	Dl-3,4-dihydroxyphenyl glycol	[M-H]-	HMDB0000318	C05576	Benzenoids	Phenols	Benzenediols	1.85148e+06	2.82447e+06	1.60102e+06	971099	2.00693e+07	2.76392e+06	3.90436e+07	1.28578e+07	1.93124e+06	661402	1.74067e+07	676789	8.26702e+06	8.94308e+06	8.27299e+06
M103T285	103.039	284.708	Dl-a-hydroxybutyric acid	[M-H]-	HMDB0000008	C05984	Organic acids and derivatives	Hydroxy acids and derivatives	Alpha hydroxy acids and derivatives	1.07724e+07	2.03815e+07	3.76655e+07	2.05953e+07	1.79694e+07	8.56775e+06	2.72564e+07	3.30353e+07	6.18692e+06	1.34866e+07	1.05251e+07	5.40775e+06	1.82992e+07	1.83e+07	1.81838e+07
M131T382	131.045	382.363	DL-asparagine	[M-H]-	HMDB0000168	C00152	Organic acids and derivatives	Carboxylic acids and derivatives	Amino acids, peptides, and analogues	9.32675e+06	7.1754e+06	8.15825e+06	5.07188e+06	6.73476e+06	4.53285e+06	1.23472e+07	1.48216e+07	2.18999e+06	4.75971e+06	3.12241e+06	2.2573e+06	6.69264e+06	6.52901e+06	6.52784e+06
M154T328	154.062	327.634	DL-histidine	[M-H]-		C00768	Organic acids and derivatives	Carboxylic acids and derivatives	Amino acids, peptides, and analogues	2.45868e+06	3.4229e+06	1.94126e+06	2.21331e+06	2.10349e+06	1.19071e+06	2.25847e+06	2.55166e+06	2.50876e+06	3.73159e+06	1.09294e+06	3.65826e+06	2.12544e+06	2.21801e+06	2.21808e+06
M89T393	89.0234	392.834	Dl-lactate	[M-H]-		C01432	Organic acids and derivatives	Hydroxy acids and derivatives	Alpha hydroxy acids and derivatives	1.5525e+08	1.72411e+08	1.66476e+08	1.74099e+08	1.63408e+08	1.76259e+08	1.44345e+08	1.0201e+08	3.55912e+08	1.7238e+08	1.98826e+08	1.33997e+08	1.72789e+08	1.74205e+08	1.72797e+08
M133T376	133.013	375.51	Dl-malic acid	[M-H]-	HMDB0000744	C00497	Organic acids and derivatives	Hydroxy acids and derivatives	Beta hydroxy acids and derivatives	6.5752e+08	5.24427e+08	5.19878e+08	7.48967e+08	4.73776e+08	3.6437e+08	8.95798e+08	1.03125e+09	7.89035e+08	6.27136e+08	7.96613e+08	3.55985e+08	6.52785e+08	6.52784e+08	6.49987e+08
M116T83	116.071	82.9068	Dl-norvaline	[M-H]-			Organic acids and derivatives	Carboxylic acids and derivatives	Amino acids, peptides, and analogues	1.08034e+07	5.6558e+06	1.17705e+07	1.87404e+07	2.91076e+06	5.01473e+06	1.7419e+07	1.00195e+07	1.42269e+07	1.13899e+07	9.60399e+06	1.12174e+07	1.07161e+07	1.04531e+07	1.06967e+07
M114T395	114.055	394.997	DL-proline	[M-H]-	HMDB0000162	C00148	Organic acids and derivatives	Carboxylic acids and derivatives	Amino acids, peptides, and analogues	3.43707e+06	5.74783e+06	3.25323e+06	2.38391e+06	2.59437e+06	3.43382e+06	2.01893e+06	4.21535e+06	2.37197e+06	6.4426e+06	3.01322e+06	2.75115e+06	4.29274e+06	4.30472e+06	4.9281e+06
M104T385	104.034	385.337	DL-serine	[M-H]-	HMDB0062263	C00065	Organic acids and derivatives	Carboxylic acids and derivatives	Amino acids, peptides, and analogues	1.48112e+07	1.26402e+07	1.05675e+07	1.32137e+07	1.83551e+07	1.2186e+07	2.50792e+07	3.00111e+07	1.33036e+07	2.03819e+07	1.88305e+07	1.09718e+07	1.61103e+07	1.54969e+07	1.54967e+07
M203T324	203.082	324.259	DL-tryptophan	[M-H]-	HMDB0030396	C00078	Organoheterocyclic compounds	Indoles and derivatives	Indolyl carboxylic acids and derivatives	1.36665e+07	1.38951e+07	1.24709e+07	9.47378e+06	1.23407e+07	9.01697e+06	1.61768e+07	2.65072e+07	6.47324e+06	7.3575e+06	8.3266e+06	5.44975e+06	1.13091e+07	1.11588e+07	1.11366e+07
M179T964	179.037	964.436	D-(+)-mannose	[M-H]-	HMDB0062473	C00936	Organic oxygen compounds	Organooxygen compounds	Carbohydrates and carbohydrate conjugates	2.01387e+06	3.16446e+06	2.55981e+06	3.10938e+06	2.88252e+06	2.84332e+06	3.15339e+06	2.87657e+06	2.87421e+06	2.90831e+06	2.17884e+06	1.30624e+06	2.8729e+06	2.5809e+06	2.85656e+06
M259T62	259.023	62.0429	D-mannose 6-phosphate	[M-H]-	HMDB0001078	C00275	Organic oxygen compounds	Organooxygen compounds	Carbohydrates and carbohydrate conjugates	5.80732e+06	3.42409e+07	1.75116e+08	4.25783e+07	2.44493e+08	1.43472e+08	400703	470887	1.85463e+08	1.57253e+08	3.48573e+08	2.45061e+07	1.32354e+08	1.32382e+08	1.35686e+08
M259T400	259.023	400.351	D-mannose-6-phosphate	[M-H]-	HMDB0001078	C00275	Organic oxygen compounds	Organooxygen compounds	Carbohydrates and carbohydrate conjugates	3.61787e+07	2.20559e+08	1.8528e+09	3.97546e+08	2.45284e+09	9.68278e+08	7.19458e+06	8.96101e+06	1.4391e+09	9.85903e+08	2.46353e+09	2.49185e+08	1.00864e+09	1.00827e+09	9.64037e+08
M195T63	195.139	62.6252	Dodeca-2(e),4(e)-dienoic acid	[M-H]-			Lipids and lipid-like molecules	Fatty Acyls	Fatty acids and conjugates	1.07069e+08	1.06018e+08	9.01717e+07	8.91721e+07	7.62181e+07	9.78405e+07	8.9355e+07	8.92249e+07	9.91427e+07	8.33076e+07	1.01638e+08	9.57428e+07	7.85489e+07	7.98396e+07	7.85418e+07
M167T62	167.144	62.1511	Dodecanedioic acid	[M-H-CH2O3]-	HMDB0000623	C02678	Lipids and lipid-like molecules	Fatty Acyls	Fatty acids and conjugates	2.96996e+06	3.09015e+06	2.61169e+06	2.74892e+06	2.09008e+06	2.7572e+06	2.37287e+06	2.96503e+06	2.82588e+06	2.53957e+06	2.4786e+06	2.40801e+06	2.32211e+06	2.32147e+06	2.24015e+06
M199T67	199.17	67.1	Dodecanoic acid	[M-H]-	HMDB0000638	C02679	Lipids and lipid-like molecules	Fatty Acyls	Fatty acids and conjugates	1.84372e+07	2.32393e+07	2.85843e+07	2.19356e+07	1.62518e+07	5.53884e+07	2.36171e+07	2.18931e+07	3.03235e+07	2.41462e+07	2.94716e+07	2.28899e+07	2.06068e+07	2.06041e+07	1.97824e+07
M265T978	265.148	978.218	Dodecyl sulfate	[M-H]-			Organic acids and derivatives	Organic sulfuric acids and derivatives	Sulfuric acid esters	1.16632e+07	2.84537e+07	2.31098e+07	1.29219e+07	1.78914e+07	2.10095e+07	8.07033e+07	2.89911e+07	8.0566e+07	3.23807e+07	4.52065e+07	6.67617e+07	7.0511e+07	3.07759e+07	7.10779e+07
M266T966	266.152	965.574	Domoic acid	[M-H-CO2]-		C13732	Organic acids and derivatives	Carboxylic acids and derivatives	Amino acids, peptides, and analogues	2.57995e+06	8.73941e+06	6.41951e+06	1.46595e+06	2.59728e+06	2.50092e+06	2.60137e+06	2.1268e+06	2.53778e+06	2.66168e+06	2.78666e+06	2.54481e+06	2.55875e+06	2.55881e+06	2.48992e+06
M365T364	365.09	363.861	Doxorubicin	[M-H-C7H15NO4]-	HMDB0015132	C01661				1.93087e+06	3.05809e+06	6.787e+06	4.28108e+06	6.90711e+06	4.82011e+06	1.04391e+06	84775.5	6.95811e+06	4.64668e+06	9.35366e+06	2.34274e+06	4.67321e+06	4.66817e+06	4.57328e+06
M114T363	114.055	363.117	D-proline	[M-H]-	HMDB0003411	C00763	Organic acids and derivatives	Carboxylic acids and derivatives	Amino acids, peptides, and analogues	4.65783e+07	3.94175e+07	4.02897e+07	3.0539e+07	3.27543e+07	2.60933e+07	4.29945e+07	5.53849e+07	1.5176e+07	1.86483e+07	2.07139e+07	1.43077e+07	3.34261e+07	3.36676e+07	3.34264e+07
M201T242	201.017	241.976	D-Quinovose	(M+K-2H)-		C02522				939115	1.89877e+06	2.70523e+06	2.73355e+06	2.04603e+06	3.40805e+06	2.01885e+06	2.06536e+06	4.35254e+06	1.70295e+06	1.28439e+06	1.99847e+06	2.05081e+06	1.83552e+06	2.04929e+06
M149T344	149.045	344.456	D-ribose	[M-H]-	HMDB0000283	C00121	Organic oxygen compounds	Organooxygen compounds	Carbohydrates and carbohydrate conjugates	6.26333e+06	3.5916e+06	4.58502e+06	5.10671e+06	1.78068e+07	1.24933e+07	1.06976e+07	4.43626e+06	1.78617e+06	1.96648e+06	3.0735e+06	1.96071e+06	5.76826e+06	6.00273e+06	5.76431e+06
M229T389	229.012	388.725	D-ribose 5-phosphate	[M-H]-		C00117	Organic oxygen compounds	Organooxygen compounds	Carbohydrates and carbohydrate conjugates	6.41361e+07	4.59954e+07	8.07522e+07	4.07117e+07	8.62617e+07	5.772e+07	4.04945e+07	8.04852e+07	7.75479e+07	7.82034e+07	1.09791e+08	3.26554e+07	7.19777e+07	7.19779e+07	7.17821e+07
M309T391	308.978	390.864	D-ribulose 1,5-bisphosphate	[M-H]-		C01182	Organic oxygen compounds	Organooxygen compounds	Carbohydrates and carbohydrate conjugates	1.89013e+06	3.90723e+06	9.49528e+06	9.28045e+06	1.1945e+07	8.52263e+06	7.61406e+06	1.62221e+06	1.30566e+07	9.06912e+06	1.29154e+07	4.28839e+06	7.72771e+06	7.76917e+06	7.82338e+06
M459T392	459.032	392.275	D-ribulose 5-phosphate	[2M-H]-	HMDB0001548	C00199	Organic oxygen compounds	Organooxygen compounds	Carbohydrates and carbohydrate conjugates	1.17239e+07	6.58655e+06	2.72246e+07	6.32143e+06	3.1144e+07	1.50652e+07	2.84417e+06	1.46868e+07	2.58471e+07	2.3177e+07	4.37533e+07	4.73948e+06	1.72531e+07	1.72517e+07	1.68086e+07
M181T360	181.071	360.235	Dulcitol	[M-H]-	HMDB0000107	C01697	Organic oxygen compounds	Organooxygen compounds	Carbohydrates and carbohydrate conjugates	3.98946e+06	2.39814e+06	5.81282e+06	3.3715e+06	1.53395e+07	5.38338e+06	1.226e+07	3.7641e+06	2.53222e+06	2.4418e+06	2.21821e+06	1.65409e+06	5.06075e+06	5.17306e+06	5.05835e+06
M309T66_2	309.28	66.2821	Eicosenoic acid	[M-H]-		C16526	Lipids and lipid-like molecules	Fatty Acyls	Fatty acids and conjugates	7.98988e+06	1.80072e+07	1.49739e+07	1.01228e+07	1.31243e+07	1.24077e+07	2.25786e+07	1.06944e+07	7.42981e+06	7.13016e+06	1.1177e+07	1.17571e+07	1.38424e+07	1.33852e+07	1.33942e+07
M293T963	293.179	963.135	Embelin	[M-H]-		C10342	Organic oxygen compounds	Organooxygen compounds	Carbonyl compounds	1.00353e+06	1.07629e+06	1.41122e+06	1.04585e+06	1.39057e+06	874855	1.09989e+06	1.05919e+06	1.25058e+06	1.09365e+06	948417	3.61999e+06	1.04868e+06	1.04764e+06	1.08907e+06
M314T42	314.169	41.626	Enrofloxacin	[M-H-CO2]-	HMDB0029861		Organoheterocyclic compounds	Quinolines and derivatives	Quinoline carboxylic acids	114806	1.2513e+06	400544	1.78324e+06	2.07037e+06	1.76268e+06	1.91787e+06	969562	1.68276e+06	1.10424e+06	1.76268e+06	1.00976e+06	3.28343e+06	2.95871e+06	3.28511e+06
M274T374_1	274.025	374.144	Epalrestat	[M-H-CO2]-			Organic acids and derivatives	Carboxylic acids and derivatives	Amino acids, peptides, and analogues	969036	174069	493224	595905	1.22473e+06	74998.8	3.61668e+06	5.4368e+06	1.9061e+06	304245	2.24512e+06	101788	1.01559e+06	1.11123e+06	1.01435e+06
M337T36	337.204	35.8448	Eplerenone hydroxy acid	[M-H-C2H6O4]-						6.64519e+06	1.32688e+07	6.9922e+06	1.97125e+07	5.80569e+06	1.0878e+07	1.78048e+07	8.17045e+06	8.17449e+06	7.33505e+06	6.61363e+06	7.23379e+06	1.5244e+07	1.5244e+07	1.53554e+07
M196T36	196.007	35.7512	Ethyl 7-chloro-6-fluoro-4-hydroxyquinoline-3-carboxylate	[M-H-C3H4O2]-			Organoheterocyclic compounds	Quinolines and derivatives	Quinolones and derivatives	402367	257741	1.1172e+06	665656	5.23682e+06	1.80302e+06	2.5505e+07	5.63848e+07	235824	407424	73400.4	709099	5.6811e+06	5.20547e+06	5.63156e+06
M227T221	227.202	220.838	Ethyl laurate	[M-H]-	HMDB0033788	C05437	Lipids and lipid-like molecules	Fatty Acyls	Fatty acid esters	4.1118e+06	3.76084e+06	1.90618e+06	1.93046e+06	2.11934e+06	3.42679e+06	4.72652e+06	5.53179e+06	2.07265e+06	4.3283e+06	3.49001e+06	4.27624e+06	2.93606e+06	2.93604e+06	2.94713e+06
M125T47	124.99	46.6333	Ethyl sulfate	[M-H]-	HMDB0031233		Organic acids and derivatives	Organic sulfuric acids and derivatives	Sulfuric acid esters	8.5208e+07	8.54625e+07	1.02368e+08	1.50018e+08	1.12197e+08	1.01233e+08	9.90707e+07	1.25875e+08	1.08022e+08	8.60137e+07	8.86737e+07	1.02377e+08	9.85838e+07	1.00814e+08	9.85823e+07
M242T242	242.176	241.897	Etodolac	[M-H-CO2]-	HMDB0014887	C06991	Organoheterocyclic compounds	Indoles and derivatives	Indolyl carboxylic acids and derivatives	9.02602e+06	1.17252e+07	1.22628e+07	1.17562e+07	7.79444e+06	1.47666e+07	8.98181e+06	2.06892e+07	1.55867e+07	1.22024e+07	6.17986e+06	1.39921e+07	1.5167e+07	1.57824e+07	1.57817e+07
M213T52	213.149	52.0287	Fa 12:1+1o	[M-H]-			Organic acids and derivatives	Hydroxy acids and derivatives	Medium-chain hydroxy acids and derivatives	317049	543206	503359	103372	160359	324892	330935	143826	519596	550471	931730	193475	472328	432696	479493
M297T110	297.244	109.57	Fa 18:1+1o	[M-H]-	HMDB0061650	C19418	Lipids and lipid-like molecules	Fatty Acyls	Lineolic acids and derivatives	2.58398e+06	2.2995e+06	2.4853e+06	2.34724e+06	2.00851e+06	2.51426e+06	7.0564e+06	8.67843e+06	7.57227e+06	5.46439e+06	6.52374e+06	1.13043e+07	4.79784e+06	4.80383e+06	5.10752e+06
M169T229	169.086	229.295	Fa 9:2+1o	[M-H]-			Organic acids and derivatives	Keto acids and derivatives	Medium-chain keto acids and derivatives	6.40161e+06	1.85786e+06	226556	1.76051e+06	1.45988e+06	395105	5.77218e+06	2.18497e+07	1.60751e+06	3.83683e+06	713489	4.83338e+06	836280	864444	865458
M275T313	275.059	313.438	Flutamide	[M-H]-	HMDB0014642	C07653	Benzenoids	Benzene and substituted derivatives	Trifluoromethylbenzenes	576070	422367	665242	434771	609422	1.24549e+06	242132	605700	719324	464437	587794	352958	665827	670007	752465
M164T311	164.035	311.047	Formylanthranilic acid	[M-H]-	HMDB0004089	C05653	Benzenoids	Benzene and substituted derivatives	Benzoic acids and derivatives	872815	707431	698530	474191	624003	751540	581714	797844	835007	597183	700740	636538	725648	712835	796890
M115T36	115.019	35.5694	Fumarate	[M-H]-	HMDB0000134	C00122	Organic acids and derivatives	Carboxylic acids and derivatives	Dicarboxylic acids and derivatives	1.12606e+07	2.54564e+07	2.83551e+07	3.44719e+07	9.0087e+07	2.88473e+07	9.79831e+06	3.03366e+06	3.09228e+07	1.44327e+07	4.27504e+07	1.2579e+07	3.03856e+07	3.06554e+07	2.84436e+07
M169T52	169.017	51.6219	Gallic acid	[M-H]-	HMDB0005807	C01424	Benzenoids	Benzene and substituted derivatives	Benzoic acids and derivatives	1.0369e+07	3.31925e+07	1.57536e+08	1.56687e+08	2.47541e+07	1.2927e+07	1.94912e+07	4.80074e+07	6.18424e+07	1.86754e+08	2.68921e+08	8.68934e+07	8.46399e+07	8.58865e+07	8.58872e+07
M102T211	102.019	210.888	.gamma.-aminobutyric acid	[M-H]-	HMDB0000112	C00334	Organic acids and derivatives	Carboxylic acids and derivatives	Amino acids, peptides, and analogues	5.99864e+06	1.52185e+07	1.61245e+07	2.01051e+07	1.40316e+07	1.70835e+07	2.06779e+07	1.41579e+07	1.9439e+07	1.72136e+07	1.57984e+07	1.54948e+07	1.58359e+07	1.68385e+07	1.6044e+07
M103T327	103.039	327.142	.gamma.-hydroxybutyric acid	[M-H]-	HMDB0000710	C00989	Lipids and lipid-like molecules	Fatty Acyls	Fatty acids and conjugates	2.64217e+06	6.89861e+06	4.86776e+06	2.36994e+06	2.90381e+06	2.65162e+06	1.3726e+06	1.03422e+07	3.30815e+06	2.05328e+06	1.83269e+06	999612	3.79918e+06	3.00066e+06	3.13723e+06
M277T991	277.218	991.079	.gamma.-linolenic acid	[M-H]-	HMDB0003073	C06426	Lipids and lipid-like molecules	Fatty Acyls	Lineolic acids and derivatives	1.56771e+06	2.44036e+06	1.67982e+06	2.25748e+06	1.72783e+06	2.90357e+06	1.66728e+06	1.85417e+06	1.87132e+06	1.79942e+06	1.59938e+06	2.31315e+06	1.96761e+06	2.01795e+06	2.01807e+06
M497T45	497.295	45.3194	Ganoderic acid a	[M-H-H2O]-			Lipids and lipid-like molecules	Prenol lipids	Triterpenoids	371906	248821	2.17974e+06	265611	395326	541704	4.44949e+06	2.69289e+06	77984.7	621892	80779	263649	724120	804576	740800
M282T375	282.121	375.364	Gln-his	[M-H]-	HMDB0028799		Organic acids and derivatives	Carboxylic acids and derivatives	Amino acids, peptides, and analogues	2.89102e+06	3.51314e+06	4.07408e+06	3.05536e+06	274695	3.40085e+06	2.93439e+06	3.21427e+06	4.21259e+06	5.35971e+06	2.84078e+06	3.57999e+06	2.06046e+06	2.05779e+06	1.99139e+06
M258T396	258.039	395.909	Glucosamine-6-phosphate	[M-H]-	HMDB0001254	C00352	Organic oxygen compounds	Organooxygen compounds	Carbohydrates and carbohydrate conjugates	2.17361e+06	2.17361e+06	2.15874e+06	3.65197e+06	6.97269e+06	966134	3.03904e+06	1.63879e+06	5.91736e+06	2.0884e+06	1.18901e+07	63318.9	2.13927e+06	2.14455e+06	1.91112e+06
M119T929_2	119.016	928.71	Glufosinate	[M-H-CH3NO2]-		C05042	Organic acids and derivatives	Carboxylic acids and derivatives	Amino acids, peptides, and analogues	1.47221e+07	2.05471e+07	3.87441e+07	5.02543e+07	4.70708e+07	2.74235e+07	4.75812e+07	4.96398e+07	4.3652e+07	2.19257e+07	4.8368e+07	3.05526e+07	3.19495e+07	2.41327e+07	2.45949e+07
M277T359	277.074	358.526	Glu-Met	[M-H]-	HMDB0028825		Organic acids and derivatives	Carboxylic acids and derivatives	Amino acids, peptides, and analogues	4.62175e+06	6.07748e+06	6.87815e+06	5.91412e+06	6.91623e+06	6.00932e+06	4.18242e+06	202583	5.968e+06	5.18344e+06	1.75477e+07	5.45412e+06	6.73418e+06	6.76055e+06	7.36476e+06
M146T376_2	146.045	376.127	Glutamic acid	[M-H]-	HMDB0000148	C00025	Organic acids and derivatives	Carboxylic acids and derivatives	Amino acids, peptides, and analogues	1.67495e+08	1.78837e+08	3.6752e+08	1.60379e+08	4.29219e+08	2.70386e+08	6.46468e+08	4.66159e+08	6.83056e+07	9.29875e+07	1.1668e+08	9.79353e+07	2.67099e+08	2.67087e+08	2.63837e+08
M131T362	131.034	362.12	Glutaric acid	[M-H]-	HMDB0000661	C00489	Organic acids and derivatives	Carboxylic acids and derivatives	Dicarboxylic acids and derivatives	2.31077e+06	2.81511e+06	4.73518e+06	4.41273e+06	4.79585e+06	3.27078e+06	3.38969e+06	4.49968e+06	3.61095e+06	2.41108e+06	4.36394e+06	1.86095e+06	3.36514e+06	3.53831e+06	3.36472e+06
M306T376	306.077	375.885	Glutathione	[M-H]-	HMDB0000125	C00051	Organic acids and derivatives	Carboxylic acids and derivatives	Amino acids, peptides, and analogues	2.13834e+08	1.94687e+08	2.65252e+08	1.63094e+08	1.11954e+08	1.31258e+08	6.88278e+08	1.95968e+08	1.66466e+08	1.24748e+08	2.24762e+08	1.07035e+08	2.24707e+08	2.24722e+08	2.18711e+08
M189T383_2	189.052	382.732	Gly-Asp	[M-H]-			Organic acids and derivatives	Carboxylic acids and derivatives	Amino acids, peptides, and analogues	4.52689e+06	3.40215e+06	3.98464e+06	2.3689e+06	2.3643e+06	1.79037e+06	4.73291e+06	1.24552e+07	1.14924e+06	1.41676e+06	1.41395e+06	970518	3.34206e+06	3.54656e+06	3.54412e+06
M105T350	105.018	350.476	Glycerate	[M-H]-	HMDB0000139	C00258	Organic oxygen compounds	Organooxygen compounds	Carbohydrates and carbohydrate conjugates	1.04182e+06	3.50136e+06	2.12594e+06	7.46398e+06	5.86178e+06	3.03502e+06	763595	251771	1.5664e+07	2.38829e+06	7.07054e+06	3.87213e+06	4.22638e+06	4.42426e+06	4.22739e+06
M91T371	91.0276	371.359	Glycerol	[M-H]-	HMDB0000131	C00116	Organic oxygen compounds	Organooxygen compounds	Carbohydrates and carbohydrate conjugates	374977	706027	2.05759e+06	676079	924836	776529	781286	3.77883e+06	1.38393e+06	664802	982942	533702	953236	960417	1.07277e+06
M171T443	171.006	443.289	Glycerol 3-phosphate	(M-H)-	HMDB0000126	C00093	Lipids and lipid-like molecules	Glycerophospholipids	Glycerophosphates	1.06197e+06	1.2175e+06	1.43382e+06	1.49755e+06	874225	1.36891e+06	1.03358e+06	1.05972e+06	1.13078e+06	868665	1.67874e+06	714626	1.23119e+06	1.08848e+06	1.22683e+06
M171T385	171.006	385.338	Glycerophosphate(2)	[M-H]-	HMDB0000126	C00093	Lipids and lipid-like molecules	Glycerophospholipids	Glycerophosphates	1.47375e+06	532901	1.1486e+06	2.4893e+07	3.50831e+07	7.27556e+06	1.10533e+07	5.29399e+06	1.15806e+07	362152	1.37427e+07	1.41057e+06	9.18066e+06	9.10944e+06	9.1091e+06
M74T383	74.0236	383.353	Glycine	[M-H]-	HMDB0000123	C00037	Organic acids and derivatives	Carboxylic acids and derivatives	Amino acids, peptides, and analogues	2.06073e+07	1.62444e+07	1.59994e+07	1.48299e+07	1.70416e+07	1.22874e+07	2.68544e+07	3.96178e+07	1.00893e+07	1.35056e+07	1.21301e+07	8.76024e+06	1.67146e+07	1.67439e+07	1.67441e+07
M464T275	464.315	274.998	Glycocholic acid	[M-H]-	HMDB0000138	C01921	Lipids and lipid-like molecules	Steroids and steroid derivatives	Bile acids, alcohols and derivatives	1.11765e+08	9.68445e+07	5.65145e+07	5.54107e+07	3.06986e+07	1.67635e+07	7.22808e+07	6.84134e+07	3.86427e+07	3.75893e+07	2.09536e+07	1.08671e+08	7.04398e+07	7.03203e+07	7.03207e+07
M75T348	75.0076	348.396	Glycolate	[M-H]-	HMDB0000115	C00160	Organic acids and derivatives	Hydroxy acids and derivatives	Alpha hydroxy acids and derivatives	1.29466e+06	2.41664e+06	4.63592e+06	4.43521e+06	6.19432e+06	4.11038e+06	1.80728e+06	1.35426e+06	5.431e+06	4.637e+06	9.39273e+06	2.31683e+06	4.4537e+06	4.25036e+06	4.24952e+06
M339T40	339.2	40.4698	Gly-His-Lys	[M-H]-			Organic acids and derivatives	Carboxylic acids and derivatives	Amino acids, peptides, and analogues	6.00204e+07	1.77202e+08	7.52487e+07	1.58867e+08	7.83799e+07	1.01478e+08	2.29478e+08	1.30826e+08	2.12104e+08	1.58389e+08	1.1043e+08	1.45305e+08	3.25399e+08	3.22149e+08	3.25412e+08
M175T361	175.072	360.906	Gly-Thr	[M-H]-			Organic acids and derivatives	Carboxylic acids and derivatives	Amino acids, peptides, and analogues	1.86086e+06	1.98348e+06	3.18075e+06	1.55192e+06	1.62789e+06	1.21845e+06	2.02863e+06	546818	1.27739e+06	796050	1.66717e+06	559110	1.87359e+06	1.90865e+06	1.87451e+06
M166T263	166.017	262.631	Guanidinoethyl sulfonate	[M-H]-	HMDB0003584	C01959	Organic acids and derivatives	Organic sulfonic acids and derivatives	Organosulfonic acids and derivatives	4.69452e+06	3.59729e+06	1.23645e+07	1.14105e+07	8.19359e+06	4.66758e+06	1.63961e+07	2.813e+07	3.60582e+06	2.87784e+06	4.59497e+06	1.62121e+06	5.63674e+06	5.51461e+06	5.41234e+06
M130T377_1	130.061	376.815	Guanidinopropionic acid	[M-H]-	HMDB0013222	C03065	Organic nitrogen compounds	Organonitrogen compounds	Guanidines	4.13558e+08	4.25581e+08	4.51115e+08	4.19747e+08	5.03552e+08	4.22894e+08	3.13437e+08	3.5393e+08	3.44539e+08	3.67255e+08	4.72778e+08	2.85437e+08	3.97949e+08	3.97953e+08	3.96707e+08
M362T395	362.051	395.471	Guanosine 5'-monophosphate (GMP)	(M-H)-	HMDB0001397	C00144	Lipids and lipid-like molecules	Fatty Acyls	Eicosanoids	3.4754e+07	3.49974e+07	2.45821e+07	3.01576e+07	2.32602e+07	2.6198e+07	2.41201e+07	3.05548e+07	1.97568e+07	2.93844e+07	2.11339e+07	2.7466e+07	2.58887e+07	2.52369e+07	2.57761e+07
M269T67	269.249	67.1	Heptadecanoic acid	[M-H]-	HMDB0002259		Lipids and lipid-like molecules	Fatty Acyls	Fatty acids and conjugates	9.30842e+06	1.42171e+07	1.69225e+07	1.4599e+07	1.10543e+07	1.32315e+07	1.98796e+07	2.13781e+07	1.06942e+07	9.79217e+06	9.07878e+06	1.3769e+07	1.47451e+07	1.47442e+07	1.51734e+07
M305T48_1	305.106	47.8373	Heptanedioic acid, 1-[2-[(2-carboxyphenyl)methylene]hydrazide]	[M-H]-			Benzenoids	Benzene and substituted derivatives	Benzoic acids and derivatives	2.37539e+06	618091	194709	128099	2.34151e+06	1.2294e+06	1.06719e+07	6.11635e+06	618091	618091	618091	618091	678259	680248	797835
M257T279	257.078	278.909	His-Cys	[M-H]-	HMDB0000884					1.07677e+06	1.48709e+06	1.94476e+06	1.85684e+06	3.35529e+06	2.17853e+06	1.28692e+06	1.43713e+06	1.92148e+06	1.46288e+06	2.57127e+06	1.04774e+06	1.77592e+06	1.78743e+06	1.78768e+06
M340T362	340.163	361.782	His-Trp	[M-H]-			Organic acids and derivatives	Carboxylic acids and derivatives	Amino acids, peptides, and analogues	772935	767155	1.98681e+06	967420	1.71221e+06	967156	1.63391e+06	1.49021e+06	770751	522549	1.56393e+06	175873	1.15979e+06	1.22135e+06	1.15883e+06
M205T395	205.035	395.183	Homocitrate	[M-H]-	HMDB0003518	C01251	Organic acids and derivatives	Carboxylic acids and derivatives	Tricarboxylic acids and derivatives	2.6266e+06	438601	136856	3.82238e+06	634501	490360	1.08451e+06	4.83317e+06	128999	1.12811e+06	351865	52367.4	1.20954e+06	1.17654e+06	1.1988e+06
M149T238	149.026	237.612	Homogentisic acid	[M-H-H2O]-	HMDB0000130	C00544	Benzenoids	Benzene and substituted derivatives	Phenylacetic acids	6.61371e+06	5.186e+06	1.11875e+07	8.2319e+06	2.90209e+06	2.3159e+06	9.5068e+06	1.36534e+07	2.00708e+06	3.73305e+06	5.187e+06	2.47046e+06	8.36118e+06	6.05446e+06	5.93303e+06
M325T41	325.184	40.6317	Hydroquinidine	[M-H]-		C10696				7.66114e+07	2.21499e+08	9.67793e+07	2.1875e+08	8.88707e+07	1.14111e+08	2.65121e+08	1.69274e+08	2.54409e+08	1.99531e+08	1.33498e+08	1.83908e+08	4.09681e+08	4.03935e+08	4.09811e+08
M181T276	181.05	275.821	Hydroxyphenyllactic acid	[M-H]-	HMDB0000755	C03672	Phenylpropanoids and polyketides	Phenylpropanoic acids		1.95856e+06	2.39589e+06	3.34156e+06	1.84326e+06	4.83334e+06	4.61716e+06	2.96603e+06	3.68162e+06	4.35409e+06	2.27521e+06	1.41778e+07	1.41174e+06	3.97125e+06	3.95779e+06	3.88515e+06
M197T47	196.983	47.4952	Hydroxypyruvic acid dimethyl ketal phosphate	[M-H-CH4O]-			Organic oxygen compounds	Organooxygen compounds	Ethers	1.57658e+06	1.15993e+06	2.28531e+06	966338	930576	1.37291e+06	1.52188e+06	1.34068e+06	1.31273e+06	1.46399e+06	1.80035e+06	1.80983e+06	1.26339e+06	1.26238e+06	1.31536e+06
M323T44	323.168	43.5419	Hymeglusin	[M-H]-			Lipids and lipid-like molecules	Fatty Acyls	Fatty acids and conjugates	596282	2.54711e+06	835704	2.26255e+06	139384	971286	2.96676e+06	1.83572e+06	3.11874e+06	1.8214e+06	1.25272e+06	1.57177e+06	6.95497e+06	6.9597e+06	6.12525e+06
M243T273	243.172	272.56	Ile-Ile	[M-H]-			Organic acids and derivatives	Carboxylic acids and derivatives	Amino acids, peptides, and analogues	6.84131e+06	1.17765e+07	9.37312e+06	4.18545e+06	6.94243e+06	1.11407e+07	3.27933e+06	2.38127e+06	5.64794e+06	7.54507e+06	6.32291e+06	9.04755e+06	7.31306e+06	7.31295e+06	7.36641e+06
M261T276	261.128	275.955	Ile-Met	[M-H]-			Organic acids and derivatives	Carboxylic acids and derivatives	Amino acids, peptides, and analogues	2.91171e+06	6.27434e+06	4.43949e+06	2.27968e+06	3.49061e+06	4.35941e+06	1.99524e+06	1.72425e+06	3.59773e+06	4.92866e+06	3.27696e+06	5.37928e+06	4.0206e+06	3.87245e+06	3.87252e+06
M114T113	114.019	113.004	Iminodiacetic acid	[M-H-H2O]-	HMDB0011753	C19911	Organic acids and derivatives	Carboxylic acids and derivatives	Amino acids, peptides, and analogues	6.92772e+06	3.93883e+06	4.53894e+06	5.99221e+06	3.42938e+06	3.69209e+06	1.00313e+07	5.41887e+06	3.81193e+06	3.00819e+06	6.24913e+06	5.00605e+06	4.81989e+06	5.42283e+06	4.8253e+06
M116T354	116.071	354.228	Indole	[M-H]-	HMDB0000738	C00463	Organoheterocyclic compounds	Indoles and derivatives	Indoles	5.36295e+07	5.45662e+07	7.40938e+07	4.07612e+07	4.73676e+07	3.57019e+07	7.73415e+07	1.18278e+08	3.95229e+07	3.26137e+07	4.43506e+07	2.56813e+07	5.34452e+07	5.24781e+07	5.24763e+07
M202T262	202.108	261.637	Indole-3-butyric acid	[M-H]-	HMDB0002096	C11284	Organoheterocyclic compounds	Indoles and derivatives	Indoles	5.99938e+07	1.63886e+08	1.01382e+08	4.42455e+07	3.8272e+07	2.52671e+07	8.85537e+07	1.55566e+08	2.4168e+07	2.49602e+07	2.57847e+07	2.28092e+07	6.50687e+07	6.3854e+07	6.50662e+07
M144T90	144.045	90.2172	Indole-3-carboxaldehyde	[M-H]-	HMDB0029737	C08493	Organoheterocyclic compounds	Indoles and derivatives	Indoles	7.79505e+06	7.9136e+06	6.71841e+06	6.21397e+06	1.07413e+07	4.77956e+06	5.97096e+06	9.16971e+06	3.91053e+06	3.78916e+06	5.11616e+06	2.77835e+06	5.41923e+06	5.40411e+06	5.40405e+06
M142T296	142.065	296.5	Indoleacrylic acid	[M-H-CO2]-	HMDB0000734		Organoheterocyclic compounds	Indoles and derivatives	Indoles	161989	133315	284515	182600	1.27736e+06	1.01514e+06	1.3225e+06	446561	137345	58283	196866	216275	276847	276875	263253
M186T36_1	186.045	35.5316	Indolelactic acid	[M-H-H2O]-	HMDB0000671	C02043	Organoheterocyclic compounds	Indoles and derivatives	Indolyl carboxylic acids and derivatives	4.69697e+08	1.01911e+09	1.22007e+09	1.10591e+09	3.49547e+09	1.14731e+09	3.93457e+08	1.1789e+08	1.177e+09	5.47589e+08	1.64885e+09	5.15505e+08	1.20193e+09	1.21278e+09	1.12701e+09
M212T45	212.002	44.6643	Indoxyl sulfate	[M-H]-	HMDB0000682		Organic acids and derivatives	Organic sulfuric acids and derivatives	Arylsulfates	2.68529e+07	1.15634e+07	2.23318e+07	1.2908e+07	9.87571e+06	1.10792e+07	2.25907e+07	4.58835e+07	7.25727e+06	4.87633e+06	9.25826e+06	4.15108e+06	1.57558e+07	1.57554e+07	1.53978e+07
M267T318	267.074	317.849	Inosine	[M-H]-	HMDB0000195	C00294	Nucleosides, nucleotides, and analogues	Purine nucleosides		1.8662e+08	2.69476e+08	7.60456e+07	5.57217e+07	5.3252e+07	1.4182e+08	8.31159e+07	1.56248e+08	2.10013e+08	9.07426e+07	1.05932e+08	1.28664e+08	1.3771e+08	1.34173e+08	1.34181e+08
M347T389	347.04	389.388	Inosine 5'-monophosphate	[M-H]-	HMDB0000175	C00130	Nucleosides, nucleotides, and analogues	Purine nucleotides	Purine ribonucleotides	1.25346e+09	1.50151e+09	1.58229e+09	1.43359e+09	1.33489e+09	1.36285e+09	7.95136e+08	1.04222e+09	1.20499e+09	1.37126e+09	1.65386e+09	9.08476e+08	1.28188e+09	1.28378e+09	1.27404e+09
M369T390_2	369.025	389.664	Inosine 5'-monophosphate (IMP)	(M+Na-2H)-	HMDB0000175	C00130	Nucleosides, nucleotides, and analogues	Purine nucleotides	Purine ribonucleotides	1.55236e+07	1.74838e+07	2.47736e+07	1.78418e+07	2.57193e+07	1.67081e+07	9.44674e+06	1.14977e+07	2.34567e+07	2.23592e+07	3.21098e+07	1.38672e+07	1.62e+07	1.61872e+07	1.55181e+07
M435T34	435.1	34.0681	Irisxanthone	[M-H]-		C10067	Organoheterocyclic compounds	Benzopyrans	1-benzopyrans	7.9427e+06	5.73263e+06	286061	9.7776e+07	847105	1.03937e+07	5.59323e+06	692015	1.67578e+06	837865	1.15259e+06	1.29344e+06	1.28833e+07	1.2039e+07	1.28832e+07
M115T115	115.076	114.52	Isocaproic acid	(M-H)-	HMDB0000689		Lipids and lipid-like molecules	Fatty Acyls	Fatty acids and conjugates	1.62534e+07	2.25317e+07	1.3591e+07	2.84686e+07	1.59712e+07	1.33814e+07	1.61772e+07	1.64008e+07	1.11488e+07	2.01518e+07	1.82994e+07	1.82487e+07	1.64521e+07	1.64497e+07	1.6698e+07
M173T383	173.009	383.442	Isocitric acid	[M-H-H2O]-	HMDB0000193	C00311	Organic acids and derivatives	Carboxylic acids and derivatives	Tricarboxylic acids and derivatives	1.13219e+07	9.52912e+06	1.58499e+07	1.37356e+07	1.18048e+07	1.03336e+07	1.74248e+07	1.66295e+07	6.648e+06	1.02027e+07	1.05996e+07	6.14233e+06	1.15408e+07	1.14092e+07	1.15449e+07
M391T925	391.289	925.102	Isodeoxycholic acid	[M-H]-	HMDB0002536	C17661	Lipids and lipid-like molecules	Steroids and steroid derivatives	Bile acids, alcohols and derivatives	3.87943e+06	4.12635e+06	3.29966e+06	5.26292e+06	2.33353e+06	4.48735e+06	4.76856e+06	5.80208e+06	4.69105e+06	5.12569e+06	5.40767e+06	2.85478e+06	4.29931e+06	4.01843e+06	4.29404e+06
M221T962	221.031	961.798	Isofraxidin	[M-H]-		C17480	Phenylpropanoids and polyketides	Coumarins and derivatives	Hydroxycoumarins	7.01492e+06	6.21284e+06	6.75956e+06	6.67289e+06	6.93404e+06	6.60587e+06	6.70164e+06	6.12618e+06	6.75451e+06	6.97201e+06	6.65728e+06	6.61104e+06	6.96863e+06	6.96766e+06	7.0381e+06
M242T47	242.012	46.8621	Isogentisin	[M-H-CH3]-	HMDB0030871	C10070	Organoheterocyclic compounds	Benzopyrans	1-benzopyrans	2.71568e+07	3.45667e+07	1.23436e+08	3.48078e+07	7.30711e+07	5.82576e+07	2.5531e+08	3.59467e+08	6.25607e+06	1.47694e+07	2.49812e+07	5.69585e+06	7.48226e+07	7.59263e+07	7.48235e+07
M130T369	130.087	368.904	Isoleucine	[M-H]-	HMDB0033923	C00407	Organic acids and derivatives	Carboxylic acids and derivatives	Amino acids, peptides, and analogues	3.72955e+07	3.12849e+07	1.16963e+07	2.76275e+07	1.6323e+07	2.82751e+07	3.63045e+07	4.00617e+07	2.69382e+07	3.06318e+07	2.58395e+07	2.59857e+07	5.13999e+07	5.14808e+07	6.4005e+07
M227T383_1	226.996	383.442	Isopentenyl pyrophosphate	[M-H-H2O]-	HMDB0001347	C00129	Lipids and lipid-like molecules	Prenol lipids	Isoprenoid phosphates	4.41119e+06	2.13568e+07	5.266e+07	1.09373e+07	6.80827e+07	3.57583e+07	2.85683e+06	6.44578e+06	2.5465e+07	2.54975e+07	7.13454e+07	9.88452e+06	2.86305e+07	2.87273e+07	2.64735e+07
M485T43	485.282	43.1273	Kendomycin	[M-H]-						3.60043e+07	2.83905e+07	3.94539e+07	3.99931e+07	3.52028e+07	4.47401e+07	4.89942e+07	2.95493e+07	4.56954e+07	2.81548e+07	4.33909e+07	4.20383e+07	7.92079e+07	7.76488e+07	7.76673e+07
M129T66	129.055	66.4933	Ketoleucine	[M-H]-	HMDB0000695	C00233	Organic acids and derivatives	Keto acids and derivatives	Short-chain keto acids and derivatives	1.117e+08	1.03469e+08	1.09669e+08	6.8868e+07	8.26725e+07	6.31507e+07	1.85913e+08	2.13747e+08	4.28289e+07	4.28953e+07	3.64195e+07	1.96883e+07	8.36932e+07	8.68263e+07	8.35682e+07
M129T383	129.019	383.442	L-2-hydroxyglutaric acid	[M-H-H2O]-	HMDB0059655	C03196	Organic acids and derivatives	Hydroxy acids and derivatives	Short-chain hydroxy acids and derivatives	1.21133e+07	1.02369e+07	1.64634e+07	1.35346e+07	1.25004e+07	1.17631e+07	2.22695e+07	1.97411e+07	6.61001e+06	1.04274e+07	1.08853e+07	6.37973e+06	1.24955e+07	1.21283e+07	1.24953e+07
M381T37	381.237	36.8779	L-alaninamide, n-[2-[2-(hydroxyamino)-2-oxoethyl]-4-methyl-1-oxopentyl]-3-methyl-l-valyl-n-(2-aminoethyl)-	[M-H-H3NO]-			Organic acids and derivatives	Carboxylic acids and derivatives	Amino acids, peptides, and analogues	4.64956e+06	9.3909e+06	4.43391e+06	1.24336e+07	2.55692e+06	5.79292e+06	1.00855e+07	6.78381e+06	5.71351e+06	4.76588e+06	2.63872e+06	5.03844e+06	2.2694e+07	2.29682e+07	2.27967e+07
M197T227	197.007	226.72	L-Ascorbic acid	(M+Na-2H)-		C00072				9.24691e+06	1.86936e+07	2.78429e+07	5.39047e+07	2.94994e+07	2.36354e+07	1.46012e+07	5.47956e+08	3.11236e+07	2.01241e+07	4.97048e+07	1.46931e+07	2.58586e+07	2.59539e+07	2.81207e+07
M132T380	132.029	379.591	L-aspartic acid	[M-H]-	HMDB0062186	C00049	Organic acids and derivatives	Carboxylic acids and derivatives	Amino acids, peptides, and analogues	1.06721e+08	7.11105e+07	1.91865e+08	1.21873e+08	1.18615e+08	7.96022e+07	1.29677e+08	9.60663e+07	5.57274e+07	8.32134e+07	9.3706e+07	4.06819e+07	1.03802e+08	1.05398e+08	1.0543e+08
M256T520_2	256.237	520.365	Lauric isopropanolamide	[M-H]-			Lipids and lipid-like molecules	Fatty Acyls	Fatty amides	948460	917757	696170	929786	936234	515140	1.65472e+06	1.70625e+06	1.60337e+06	1.76488e+06	1.017e+06	2.13106e+06	539802	552357	948473
M304T382	304.061	382.479	L-cysteine-glutathione disulfide	[M-H-C3H7SO2N]-			Organic acids and derivatives	Carboxylic acids and derivatives	Amino acids, peptides, and analogues	5.9031e+06	6.22817e+06	6.16453e+06	4.95686e+06	2.51943e+06	4.35839e+06	1.68674e+07	4.74075e+06	4.4608e+06	3.8921e+06	4.83628e+06	3.4216e+06	6.6019e+06	6.45832e+06	6.60187e+06
M495T48	495.276	48.194	Leukotriene d4	[M-H]-	HMDB0003080	C05951	Lipids and lipid-like molecules	Fatty Acyls	Eicosanoids	401499	525611	2.42264e+06	590148	195188	687352	913712	1.15743e+06	427372	86089.8	274808	808774	733563	678008	733782
M277T261	277.156	260.612	Leu-Phe	[M-H]-			Organic acids and derivatives	Carboxylic acids and derivatives	Amino acids, peptides, and analogues	1.57677e+06	4.2388e+06	4.77787e+06	2.00277e+06	2.66055e+06	4.65173e+06	5.04001e+06	3.57391e+06	2.478e+06	2.54969e+06	2.06605e+06	3.54427e+06	2.76223e+06	3.035e+06	3.0351e+06
M272T377	272.09	376.994	L-glutathione, reduced	[M-H-H2S]-	HMDB0062697	C00051	Organic acids and derivatives	Carboxylic acids and derivatives	Amino acids, peptides, and analogues	4.44049e+06	4.78282e+06	8.23799e+06	5.20617e+06	2.64588e+06	3.62608e+06	1.96745e+07	4.43296e+06	4.47237e+06	2.86598e+06	6.3158e+06	3.40903e+06	5.63372e+06	5.64808e+06	5.21875e+06
M220T269	220.065	268.791	L-Histidinol phosphate	[M-H]-		C01100				1.53274e+07	2.98623e+07	1.40522e+07	8.1017e+06	6.18613e+06	4.20827e+06	1.60594e+07	3.29431e+07	4.81569e+06	8.03228e+06	5.93511e+06	4.55321e+06	1.2808e+07	1.29496e+07	1.29495e+07
M188T67	188.111	66.7276	L-homocitrulline	[M-H]-	HMDB0000679	C02427	Organic acids and derivatives	Carboxylic acids and derivatives	Amino acids, peptides, and analogues	3.26845e+06	5.8529e+06	1.02843e+06	2.71098e+06	3.23705e+06	3.17015e+07	1.6136e+06	1.30545e+06	3.45712e+06	1.5673e+06	8.22848e+06	2.8396e+06	4.41341e+06	4.99289e+06	4.42665e+06
M279T66	279.233	66.2821	Linoleic acid	[M-H]-	HMDB0000673	C01595	Lipids and lipid-like molecules	Fatty Acyls	Lineolic acids and derivatives	7.92489e+08	1.52945e+09	1.08745e+09	9.12364e+08	6.813e+08	6.32291e+08	7.63908e+08	4.63161e+08	5.408e+08	5.05231e+08	4.01415e+08	8.26421e+08	7.9971e+08	7.99689e+08	7.91147e+08
M89T319_6	89.0232	319.129	L-(+)-lactic acid	[M-H]-	HMDB0000190	C00186	Organic acids and derivatives	Hydroxy acids and derivatives	Alpha hydroxy acids and derivatives	1.05195e+10	1.12371e+10	1.27389e+10	1.35621e+10	1.20952e+10	1.0825e+10	9.67274e+09	5.80806e+09	1.31149e+10	9.8321e+09	1.32909e+10	8.91065e+09	1.09505e+10	1.0951e+10	1.1011e+10
M172T276	172.098	276.064	L-leucine, n-acetyl	[M-H]-	HMDB0011756	C02710	Organic acids and derivatives	Carboxylic acids and derivatives	Amino acids, peptides, and analogues	792081	2.62378e+06	2.66151e+06	2.32407e+06	1.00685e+06	707091	2.99768e+06	4.88937e+06	586614	1.31405e+06	758105	397244	1.94139e+06	1.94129e+06	1.91197e+06
M128T359	128.071	359.116	L-pipecolic acid	[M-H]-	HMDB0000716	C00408	Organic acids and derivatives	Carboxylic acids and derivatives	Amino acids, peptides, and analogues	761463	710657	674217	936131	1.46836e+06	1.36903e+06	1.44496e+06	2.336e+06	331182	367812	329992	116127	728570	751484	752732
M128T376	128.034	376.127	L-pyroglutamic acid	[M-H]-	HMDB0000267	C01879	Organic acids and derivatives	Carboxylic acids and derivatives	Amino acids, peptides, and analogues	3.31657e+07	4.58237e+07	7.06987e+07	3.5033e+07	8.27597e+07	5.56164e+07	1.24016e+08	9.46846e+07	1.7663e+07	2.35512e+07	2.66255e+07	2.43742e+07	5.43873e+07	5.50637e+07	5.43871e+07
M135T355	135.03	355.051	L-threonate	[M-H]-	HMDB0000943	C01620	Organic oxygen compounds	Organooxygen compounds	Carbohydrates and carbohydrate conjugates	1.45395e+07	1.24124e+07	1.82116e+07	2.87141e+07	2.09051e+07	1.58343e+07	2.48877e+07	1.8602e+07	1.23737e+07	8.90014e+06	1.55776e+07	2.0196e+07	1.70658e+07	1.74734e+07	1.70661e+07
M118T412	118.05	412.288	L-Threonine	(M-H)-	HMDB0000167	C00188				962833	539834	653616	4.44686e+06	420452	476248	608198	1.03105e+06	365012	514860	423726	552817	762173	677425	684067
M241T46	241.09	46.2192	Lumichrome	[M-H]-		C01727	Organoheterocyclic compounds	Pteridines and derivatives	Alloxazines and isoalloxazines	235164	536172	201409	465492	1.51939e+06	1.22448e+06	1.222e+06	270577	1.22448e+06	149363	175329	322026	3.12077e+06	3.12128e+06	3.0153e+06
M265T920	265.148	919.653	Magnolol	[M-H]-		C10651	Benzenoids	Benzene and substituted derivatives	Biphenyls and derivatives	3.49213e+08	3.15033e+08	2.78277e+08	4.6112e+08	3.69158e+08	4.59333e+08	3.09937e+08	2.76849e+08	4.25075e+08	3.57388e+08	3.21807e+08	4.30005e+08	3.82857e+08	3.74884e+08	3.83647e+08
M115T376	115.003	375.788	Maleic acid	[M-H]-	HMDB0000176	C01384	Organic acids and derivatives	Carboxylic acids and derivatives	Dicarboxylic acids and derivatives	8.62985e+07	7.04725e+07	7.68397e+07	9.77441e+07	6.48685e+07	4.55276e+07	1.20763e+08	1.37608e+08	1.01381e+08	8.32446e+07	1.05176e+08	4.62222e+07	8.71072e+07	8.58736e+07	8.58657e+07
M357T406	357.143	406.113	Matairesinol	[M-H]-	HMDB0035698	C10682	Lignans, neolignans and related compounds	Furanoid lignans	Tetrahydrofuran lignans	2.88091e+06	6.82149e+06	2.45316e+06	2.80438e+06	4.03009e+06	2.91321e+06	9.33403e+06	5.83246e+06	3.2119e+06	4.78138e+06	2.2789e+06	3.54453e+06	4.28293e+06	4.42335e+06	4.28309e+06
M303T38	303.053	37.9615	Melphalan	[M-H]-	HMDB0015176	C07122	Organic acids and derivatives	Carboxylic acids and derivatives	Amino acids, peptides, and analogues	3.59191e+06	3.79576e+06	6.10212e+06	4.44238e+06	2.0128e+07	1.14123e+07	7.0641e+06	9.16992e+06	4.44245e+06	2.81114e+06	9.48228e+06	3.21325e+06	5.89923e+06	6.38629e+06	6.18485e+06
M275T49	275.168	48.7542	Menthyl salicylate	[M-H]-			Benzenoids	Benzene and substituted derivatives	Benzoic acids and derivatives	3.77719e+06	2.00859e+06	1.81874e+06	1.93991e+06	5.0822e+06	7.03439e+06	6.80421e+06	5.08245e+06	7.90161e+06	2.35489e+06	2.86356e+06	8.23628e+06	5.58034e+07	5.43863e+07	5.43883e+07
M129T65	129.018	65.0992	Mesaconic acid	[M-H]-	HMDB0000749	C01732	Lipids and lipid-like molecules	Fatty Acyls	Fatty acids and conjugates	2.68542e+06	3.1352e+06	8.4711e+06	5.35688e+06	1.94967e+07	4.47495e+06	2.92169e+07	8.25517e+06	5.34878e+06	6.08529e+06	6.7132e+06	3.01448e+06	7.52426e+06	8.9811e+06	9.04844e+06
M309T36	309.174	35.9048	Mestranol	[M-H]-	HMDB0015446	C07618	Lipids and lipid-like molecules	Steroids and steroid derivatives	Estrane steroids	1.73484e+07	2.93627e+07	2.27555e+07	9.19233e+07	2.7675e+07	3.2326e+07	5.07704e+07	2.31358e+07	2.51178e+07	1.88402e+07	1.74778e+07	1.96762e+07	4.28105e+07	4.31632e+07	4.2809e+07
M191T56	191.074	55.5247	Metamizole	[M-H-C7H5NO]-			Organoheterocyclic compounds	Azoles	Pyrazoles	929476	425108	144887	382084	1.26162e+06	724615	2.08113e+06	2.08271e+06	251801	611595	239539	245450	718265	718202	724547
M95T221	94.9798	221.375	Methylphosphonic acid	[M-H]-		C20396	Organic acids and derivatives	Organic phosphonic acids and derivatives	Organic phosphonic acids	1.93634e+07	1.90964e+07	1.88327e+07	2.34202e+07	1.78375e+07	1.67973e+07	3.80692e+07	5.79029e+07	1.42492e+07	1.90046e+07	1.38734e+07	1.59403e+07	2.59822e+07	2.30172e+07	2.30401e+07
M111T50_2	110.975	49.753	Methylphosphonothioic acid o-ethyl ester	[M-H-C2H4]-						2.818e+07	3.04706e+07	3.35547e+07	3.66926e+07	3.76722e+07	5.42996e+07	5.01333e+07	5.56603e+07	3.02407e+07	2.80085e+07	3.25652e+07	5.42478e+07	3.82383e+07	3.98515e+07	3.98477e+07
M397T38	397.225	37.7975	Mitragynine	[M-H]-	HMDB0041933	C09226				4.13937e+06	6.29767e+06	3.70542e+06	2.11244e+07	5.09814e+06	7.59153e+06	9.27806e+06	4.63845e+06	6.02993e+06	3.69661e+06	2.11256e+06	4.45105e+06	1.58768e+07	1.60314e+07	1.58771e+07
M273T382	273.039	382.494	Modafinil acid	[M-H]-	HMDB0061039		Benzenoids	Benzene and substituted derivatives	Diphenylmethanes	937680	1.44509e+06	1.80275e+06	2.0503e+06	3.73738e+06	2.71179e+06	5.44055e+06	9.32705e+06	3.0435e+06	2.40772e+06	467329	2.17529e+06	2.07073e+06	2.02299e+06	2.0707e+06
M193T410	193.073	409.779	Monoethyl phthalate	[M-H]-	HMDB0002120		Benzenoids	Benzene and substituted derivatives	Benzoic acids and derivatives	1.99906e+06	2.65516e+06	2.13269e+06	2.08726e+06	323072	1.78957e+06	134221	2.11218e+06	4.61919e+06	3.72834e+06	2.27486e+06	1.93939e+06	2.29841e+06	2.29795e+06	2.14704e+06
M179T312	179.056	312.373	Myo-inositol	[M-H]-	HMDB0000211	C00137	Organic oxygen compounds	Organooxygen compounds	Alcohols and polyols	412167	548023	427075	521034	467467	1.49436e+06	549486	358553	597567	749672	428741	873710	543479	533339	532983
M227T67	227.202	67.1077	Myristic acid	[M-H]-	HMDB0000806	C06424	Lipids and lipid-like molecules	Fatty Acyls	Fatty acids and conjugates	1.97054e+07	2.64314e+07	3.60637e+07	3.52585e+07	2.2657e+07	4.34675e+07	3.21066e+07	2.74065e+07	3.25383e+07	2.31883e+07	3.12699e+07	2.35559e+07	3.30831e+07	3.33453e+07	3.28173e+07
M216T34	216.055	34.0696	N-(2,4-dinitrophenyl)-l-leucine	[M-H-CH4O4]-			Organic acids and derivatives	Carboxylic acids and derivatives	Amino acids, peptides, and analogues	287510	518816	3.33621e+06	7.70676e+06	1.84629e+07	9.38108e+06	294302	2.06295e+06	6.38549e+06	434053	6.03495e+06	147291	2.08057e+06	2.11524e+06	2.03441e+06
M303T292	303.085	291.694	N-Acetylaspartylglutamate (NAAG)	(M-H)-	HMDB0001067	C12270	Organic acids and derivatives	Carboxylic acids and derivatives	Amino acids, peptides, and analogues	264842	188482	464052	188725	308277	234120	341069	434242	185433	140933	174467	154796	262241	256254	256297
M303T383	303.084	382.938	N-acetylaspartylglutamic acid	[M-H]-	HMDB0001067	C12270	Organic acids and derivatives	Carboxylic acids and derivatives	Amino acids, peptides, and analogues	438966	419809	675709	548774	368793	118852	1.47514e+06	2.83845e+07	145286	842065	305710	145374	1.54242e+06	1.54498e+06	1.44414e+06
M222T344	222.098	344.435	N-acetyl-d-galactosaminitol	[M-H]-			Organic oxygen compounds	Organooxygen compounds	Carbohydrates and carbohydrate conjugates	2.39188e+06	1.35704e+06	3.27604e+06	2.29342e+06	2.819e+06	1.77348e+06	4.69736e+06	1.63276e+06	2.20971e+06	1.7887e+06	3.33344e+06	1.23838e+06	2.54559e+06	2.71724e+06	2.54367e+06
M174T368	174.04	367.935	N-acetyl-l-aspartic acid	[M-H]-	HMDB0000812	C01042	Organic acids and derivatives	Carboxylic acids and derivatives	Amino acids, peptides, and analogues	4.73936e+06	1.50621e+07	6.6341e+06	7.56431e+06	6.32276e+06	6.31089e+06	2.42762e+07	1.40449e+07	3.97418e+06	4.50331e+06	8.80344e+06	1.71909e+06	8.14893e+06	8.41525e+06	8.15366e+06
M188T365	188.056	364.611	N-acetyl-l-glutamate	[M-H]-	HMDB0001138	C00624	Organic acids and derivatives	Carboxylic acids and derivatives	Amino acids, peptides, and analogues	345623	429558	521632	476818	140303	184260	4.90877e+06	1.81782e+06	101521	93317.4	239303	82068.4	618615	602752	602793
M190T282	190.054	281.923	N-acetyl-l-methionine	[M-H]-	HMDB0011745	C02712	Organic acids and derivatives	Carboxylic acids and derivatives	Amino acids, peptides, and analogues	7.15101e+06	7.87026e+06	5.64319e+06	4.73594e+06	3.45149e+06	3.06066e+06	1.06268e+07	1.39843e+07	3.56279e+06	4.73828e+06	4.55374e+06	5.10306e+06	6.674e+06	6.57818e+06	6.5766e+06
M206T263	206.082	262.671	N-acetyl-l-phenylalanine	[M-H]-	HMDB0000512	C03519	Organic acids and derivatives	Carboxylic acids and derivatives	Amino acids, peptides, and analogues	1.29548e+06	1.85687e+06	2.17432e+06	2.29879e+06	903062	288958	3.50876e+06	4.3134e+06	403038	1.32122e+06	1.48422e+06	323824	1.646e+06	1.65601e+06	1.6716e+06
M180T349	180.066	349.355	N-acetyl-l-tyrosine	[M-H-C2H2O]-	HMDB0000866	C01657	Organic acids and derivatives	Carboxylic acids and derivatives	Amino acids, peptides, and analogues	3.64098e+07	3.11803e+07	3.77423e+07	2.46177e+07	2.9763e+07	2.67406e+07	4.34732e+07	3.94529e+07	2.0897e+07	1.90561e+07	3.80282e+07	1.39977e+07	3.0236e+07	3.08444e+07	3.02292e+07
M308T369	308.099	368.683	N-acetylneuraminate	[M-H]-	HMDB0000230	C00270	Organic oxygen compounds	Organooxygen compounds	Carbohydrates and carbohydrate conjugates	857133	375565	960251	725679	346083	278474	1.34197e+06	1.43264e+06	238010	234986	427378	145429	732535	739018	1.12191e+06
M129T112	129.091	112.116	N-acetylputrescine	[M-H]-	HMDB0002064	C02714	Organic acids and derivatives	Carboximidic acids and derivatives	Carboximidic acids	1.52413e+07	1.36858e+07	1.03289e+07	1.54904e+07	1.38642e+07	1.20234e+07	1.71362e+07	1.129e+07	1.17162e+07	1.22341e+07	1.41779e+07	1.3636e+07	1.56802e+07	1.56796e+07	1.61822e+07
M434T52	434.294	51.9315	N-acetyl-s-geranylgeranyl-l-cysteine	[M-H]-			Lipids and lipid-like molecules	Prenol lipids	Diterpenoids	596937	956270	1.27144e+06	642319	624621	400449	1.0168e+06	2.08549e+06	920568	644506	1.5276e+06	1.14389e+06	811986	851558	912951
M662T390	662.104	390.287	NAD+	[M-H]-	HMDB0000902	C00003				6.29297e+06	8.91504e+06	1.35541e+07	1.66152e+07	2.72361e+07	1.05781e+07	1.93013e+07	1.57479e+07	6.50515e+06	7.15242e+06	1.59076e+07	2.71236e+06	1.15193e+07	1.16012e+07	1.15121e+07
M173T375	173.093	375.192	N-.alpha.-acetyl-l-ornithine	[M-H]-	HMDB0003357	C00437	Organic acids and derivatives	Carboxylic acids and derivatives	Amino acids, peptides, and analogues	2.12342e+06	4.19107e+06	3.24064e+06	2.2651e+06	2.47227e+06	1.42235e+06	934100	1.13002e+06	3.42001e+06	1.0539e+06	3.77415e+06	685250	2.05384e+06	2.13855e+06	2.13768e+06
M191T360	191.056	360.204	Neochlorogenic acid	[M-H-C9H6O3]-		C17147	Organic oxygen compounds	Organooxygen compounds	Alcohols and polyols	1.31845e+06	964692	1.05014e+06	480070	1.35449e+07	6.39954e+06	7.50686e+06	709844	513310	218821	559553	590935	1.95131e+06	2.07154e+06	1.95117e+06
M176T281	176.038	280.928	N-formyl-l-methionine	[M-H]-	HMDB0001015	C03145	Organic acids and derivatives	Carboxylic acids and derivatives	Amino acids, peptides, and analogues	907458	2.21006e+06	3.37352e+06	1.3574e+06	2.36439e+06	1.86424e+06	2.7222e+06	2.22268e+06	4.01589e+06	1.82928e+06	3.77123e+06	1.46979e+06	2.35926e+06	2.35927e+06	2.28342e+06
M193T379	192.991	378.614	Nicotinate d-ribonucleotide	[M-H-C6H7NO3]-	HMDB0001132	C01185	Nucleosides, nucleotides, and analogues	Pyridine nucleotides	Nicotinic acid nucleotides	1.81144e+06	387561	3.76828e+06	2.22645e+06	5.89978e+06	3.00301e+06	2.29914e+06	2.58751e+06	5.46031e+06	4.60801e+06	6.28483e+06	1.59008e+06	2.50527e+06	2.51972e+06	2.7608e+06
M225T234	225.063	233.848	Nitrotyrosine	[M-H]-	HMDB0001904		Organic acids and derivatives	Carboxylic acids and derivatives	Amino acids, peptides, and analogues	4.89141e+06	1.10342e+07	5.77192e+06	8.25522e+06	6.4731e+06	8.64658e+06	8.16661e+06	8.73153e+06	5.85277e+06	5.66343e+06	5.71473e+06	8.51856e+06	8.01364e+06	8.0228e+06	8.36045e+06
M157T109	157.123	109.393	Nonanoic acid	[M-H]-	HMDB0000847	C01601	Lipids and lipid-like molecules	Fatty Acyls	Fatty acids and conjugates	3.75095e+08	2.9246e+08	2.81849e+08	2.49588e+08	2.93438e+08	2.26965e+08	3.68715e+08	2.80105e+08	3.42846e+08	2.85527e+08	3.72124e+08	3.08354e+08	3.57406e+08	3.57406e+08	3.6844e+08
M196T264	196.028	263.884	Norvaline, 5-phosphono-	[M-H]-		C13734	Organic acids and derivatives	Carboxylic acids and derivatives	Amino acids, peptides, and analogues	1.33192e+06	1.84525e+06	2.17616e+06	1.80926e+06	3.09445e+06	1.05988e+06	1.01132e+07	2.66714e+07	567139	1.21299e+06	2.93113e+06	579955	3.95204e+06	4.01964e+06	3.95163e+06
M618T58	618.479	57.7418	N-palmitoyl-d-erythro-dihydroceramide-1-phosphate	[M-H]-	HMDB0010698		Lipids and lipid-like molecules	Sphingolipids	Phosphosphingolipids	66593.3	270474	369458	459397	517912	285182	2.70805e+06	1.29666e+06	953693	958121	2.13455e+06	1.04461e+06	767999	775087	779707
M362T59	362.238	58.883	N-palmitoyltaurine	[M-H]-			Lipids and lipid-like molecules	Fatty Acyls	Fatty amides	743030	704697	3.44028e+06	3.06833e+06	929724	316404	1.60768e+06	2.01699e+06	286440	389003	408297	1.21814e+06	1.3033e+06	1.30309e+06	1.24536e+06
M150T45	149.993	44.6643	N-(phosphonomethyl)glycine	[M-H-H2O]-		C01705	Organic acids and derivatives	Carboxylic acids and derivatives	Amino acids, peptides, and analogues	8.70463e+06	1.13229e+07	1.02077e+07	8.22964e+06	1.79785e+07	8.83884e+06	8.27039e+06	9.88512e+06	1.20534e+07	9.2088e+06	6.41559e+06	8.67547e+06	6.89732e+06	6.68647e+06	6.95955e+06
M390T58	390.274	57.7418	N-stearoyltaurine	[M-H]-			Lipids and lipid-like molecules	Fatty Acyls	Fatty amides	796553	699011	3.23863e+06	2.30836e+06	633962	249159	2.58479e+06	4.37292e+06	362466	1.23523e+06	140566	688828	1.34364e+06	1.33281e+06	1.33284e+06
M283T104	283.265	104.191	Octadecanoic acid	[M-H]-	HMDB0000827	C01530	Lipids and lipid-like molecules	Fatty Acyls	Fatty acids and conjugates	1.19473e+08	1.01865e+08	1.12199e+08	4.4252e+07	7.98554e+07	1.14168e+08	5.34865e+07	8.31101e+07	1.05593e+08	9.8687e+07	1.07358e+08	1.67637e+08	1.19053e+08	1.19048e+08	1.2151e+08
M143T110	143.107	110.292	Octanoic acid	[M-H]-	HMDB0000482	C06423	Lipids and lipid-like molecules	Fatty Acyls	Fatty acids and conjugates	4.90184e+07	3.79882e+07	3.44809e+07	3.94856e+07	3.99517e+07	3.15572e+07	4.66695e+07	3.47695e+07	3.86185e+07	4.16064e+07	4.87032e+07	4.50182e+07	5.04472e+07	4.76227e+07	5.04446e+07
M281T990	281.249	989.544	Oleic acid	[M-H]-	HMDB0000207	C00712	Lipids and lipid-like molecules	Fatty Acyls	Fatty acids and conjugates	1.00134e+08	1.08064e+08	1.01467e+08	1.12178e+08	1.09269e+08	1.18877e+08	1.06832e+08	1.14258e+08	1.216e+08	1.05497e+08	1.08889e+08	1.15246e+08	1.16143e+08	1.11657e+08	1.11718e+08
M140T410	140.011	410.489	O-phosphoethanolamine	[M-H]-	HMDB0000224	C00346	Organic acids and derivatives	Organic phosphoric acids and derivatives	Phosphate esters	884582	588309	761689	1.34584e+06	1.49769e+06	1.64638e+06	4.51001e+06	1.0045e+07	602095	794922	1.10683e+06	583564	1.90278e+06	1.90183e+06	1.66537e+06
M123T446	123.056	445.533	Orcinol	[M-H]-		C00727	Benzenoids	Phenols	Benzenediols	3.642e+06	2.80002e+06	3.54553e+06	1.85368e+06	3.91282e+06	1.77816e+06	4.28035e+06	4.05953e+06	1.99956e+06	2.06849e+06	3.52089e+06	1.14798e+06	2.66454e+06	3.08834e+06	3.09305e+06
M297T42	297.153	42.4464	Ostruthin	[M-H]-		C09281	Lipids and lipid-like molecules	Prenol lipids	Terpene lactones	2.40426e+07	5.92804e+07	2.78243e+07	6.27139e+07	2.42007e+07	3.21819e+07	7.24904e+07	4.6691e+07	7.6474e+07	5.26043e+07	3.80803e+07	4.54942e+07	1.10467e+08	1.08727e+08	1.08763e+08
M88T203	88.011	202.907	Oxamate	[M-H]-		C01444	Organic acids and derivatives	Carboxylic acids and derivatives	Amino acids, peptides, and analogues	5.0667e+06	4.21803e+07	7.29429e+07	9.12995e+07	8.3505e+07	6.83982e+07	1.30182e+07	9.85995e+06	5.53583e+07	2.31373e+07	2.13144e+07	1.81526e+07	2.4943e+07	3.26615e+07	3.27498e+07
M151T313	151.025	313.041	Oxypurinol	[M-H]-	HMDB0000786	C07599	Organoheterocyclic compounds	Imidazopyrimidines	Purines and purine derivatives	8.15573e+06	6.42748e+06	3.66281e+06	3.58165e+06	1.41658e+06	2.92473e+06	1.34402e+07	3.73108e+07	2.76497e+06	2.66793e+06	4.35687e+06	2.54992e+06	8.36268e+06	8.35833e+06	9.11793e+06
M255T403	255.234	402.596	Palmitic acid	[M-H]-	HMDB0000220	C00249	Lipids and lipid-like molecules	Fatty Acyls	Fatty acids and conjugates	6.39628e+06	9.90961e+06	7.57315e+06	8.18906e+06	5.41732e+06	8.05604e+06	3.10681e+06	4.76743e+06	6.44322e+06	8.84376e+06	7.60663e+06	8.17091e+06	7.86464e+06	7.53622e+06	7.5274e+06
M218T328	218.103	328.173	Pantothenic acid	[M-H]-	HMDB0000210	C00864	Organic acids and derivatives	Carboxylic acids and derivatives	Amino acids, peptides, and analogues	2.72876e+07	4.77879e+07	4.47825e+07	4.02389e+07	1.83816e+07	5.29241e+06	5.46234e+07	2.46003e+07	2.64801e+07	2.73366e+07	8.71e+07	2.05857e+07	3.73383e+07	3.75213e+07	3.7522e+07
M819T263	818.59	262.799	Pc 34:1	[M+CH3COOH-H]-			Lipids and lipid-like molecules	Glycerophospholipids	Glycerophosphocholines	1.01986e+07	3.36933e+07	1.6578e+07	1.38128e+07	1.83185e+07	2.66431e+07	6.71822e+06	4.92868e+06	4.78472e+07	3.06275e+07	2.23544e+07	7.62871e+07	2.37377e+07	2.46225e+07	2.37034e+07
M817T266	816.571	265.673	Pc 34:2	[M+CH3COOH-H]-			Lipids and lipid-like molecules	Glycerophospholipids	Glycerophosphocholines	6.99826e+06	7.73619e+06	1.41994e+07	5.79225e+06	6.7915e+06	1.54089e+07	2.59951e+06	2.45087e+06	1.34549e+07	1.42244e+07	4.44891e+06	2.1796e+07	8.25373e+06	9.09912e+06	8.26049e+06
M843T264	842.581	263.884	Pc 36:3	[M+CH3COOH-H]-			Lipids and lipid-like molecules	Glycerophospholipids	Glycerophosphocholines	882717	1.91179e+06	2.60149e+06	1.22873e+06	1.64142e+06	3.44953e+06	539234	1.89704e+06	3.66935e+06	2.61286e+06	1.18112e+06	4.90543e+06	2.21967e+06	2.10419e+06	2.21873e+06
M841T258	840.569	257.631	Pc 36:4	[M+CH3COOH-H]-			Lipids and lipid-like molecules	Glycerophospholipids	Glycerophosphocholines	7.35388e+06	1.0639e+07	1.99772e+07	6.57982e+06	6.30367e+06	2.54733e+07	4.45576e+06	6.1849e+06	1.24843e+07	1.1283e+07	1.47454e+07	1.91422e+07	1.15514e+07	1.12903e+07	1.15553e+07
M717T237	716.512	237.292	Pe 34:1	[M-H]-			Lipids and lipid-like molecules	Glycerophospholipids	Glycerophosphoethanolamines	4.07374e+06	2.33393e+06	2.1202e+06	1.54628e+06	3.02359e+06	9.73211e+06	5.13209e+06	5.95049e+06	3.23537e+06	3.45183e+06	3.9114e+06	1.96493e+06	3.27658e+06	3.41228e+06	3.41139e+06
M745T258	744.554	257.631	Pe 36:1	[M-H]-			Lipids and lipid-like molecules	Glycerophospholipids	Glycerophosphoethanolamines	8.83774e+06	9.11325e+06	1.02228e+07	7.45261e+06	9.34208e+06	9.60655e+06	6.37368e+06	9.0658e+06	9.53456e+06	1.46224e+07	1.38753e+07	1.3042e+07	9.13774e+06	9.11077e+06	9.14518e+06
M739T68	738.51	68.028	Pe 36:4	[M-H]-			Lipids and lipid-like molecules	Glycerophospholipids	Glycerophosphoethanolamines	8.3124e+07	7.80024e+07	6.49961e+07	9.4285e+07	1.02666e+08	1.11446e+08	6.97049e+07	9.27654e+07	1.3396e+08	9.32906e+07	1.19468e+08	1.24414e+08	1.00782e+08	9.77757e+07	9.86962e+07
M767T68	766.541	68.028	Pe 38:4	[M-H]-			Lipids and lipid-like molecules	Glycerophospholipids	Glycerophosphoethanolamines	2.80503e+08	2.64415e+08	2.12763e+08	2.79684e+08	3.3475e+08	2.26485e+08	2.42724e+08	2.22084e+08	3.91593e+08	3.15246e+08	3.84367e+08	3.52318e+08	2.91133e+08	2.8563e+08	2.85711e+08
M765T256	764.524	255.869	Pe 38:5	[M-H]-			Lipids and lipid-like molecules	Glycerophospholipids	Glycerophosphoethanolamines	6.09804e+06	7.06116e+06	8.85202e+06	1.22847e+07	8.13277e+06	1.53946e+07	9.85427e+06	1.04795e+07	1.22028e+07	2.37191e+07	2.4012e+07	1.89865e+07	1.08751e+07	1.03016e+07	1.08691e+07
M763T68	762.516	67.579	Pe 38:6	[M-H]-			Lipids and lipid-like molecules	Glycerophospholipids	Glycerophosphoethanolamines	1.56777e+07	1.4587e+07	1.76428e+07	1.65922e+07	2.25473e+07	2.34087e+07	1.97479e+07	5.31241e+07	2.38592e+07	2.55877e+07	3.5858e+07	2.96217e+07	2.26463e+07	2.26049e+07	2.3626e+07
M791T67	790.539	67.1976	Pe 40:6	[M-H]-			Lipids and lipid-like molecules	Glycerophospholipids	Glycerophosphoethanolamines	1.54919e+07	9.69137e+06	8.53853e+06	9.96776e+06	1.72388e+07	1.28573e+07	9.57049e+06	2.49144e+07	1.99668e+07	2.15801e+07	3.0984e+07	2.49968e+07	1.57456e+07	1.54346e+07	1.59279e+07
M789T220	788.524	219.78	Pe 40:7	[M-H]-			Lipids and lipid-like molecules	Glycerophospholipids	Glycerophosphoethanolamines	7.78769e+06	7.27068e+06	3.02804e+06	4.28872e+06	4.5698e+06	6.76185e+06	4.7774e+06	1.00283e+07	4.91882e+06	1.19623e+07	6.14403e+06	6.60244e+06	6.20656e+06	5.8975e+06	5.82175e+06
M157T220	157.123	219.528	Pelargonic acid	(M-H)-	HMDB0000847	C01601	Lipids and lipid-like molecules	Fatty Acyls	Fatty acids and conjugates	1.35864e+07	9.14232e+06	2.39698e+06	7.16462e+06	4.09366e+06	3.86322e+06	4.26262e+06	7.64003e+06	2.05396e+06	4.59769e+06	4.82607e+06	1.18151e+07	5.07029e+06	5.3379e+06	5.29822e+06
M241T67	241.217	66.94	Pentadecanoic acid	[M-H]-	HMDB0000826	C16537	Lipids and lipid-like molecules	Fatty Acyls	Fatty acids and conjugates	9.75483e+06	1.08166e+07	1.32441e+07	1.36149e+07	1.33139e+07	1.61362e+07	1.41547e+07	1.07509e+07	2.39153e+07	2.13726e+07	1.6146e+07	2.15124e+07	1.49038e+07	1.52352e+07	1.49005e+07
M299T922	298.954	921.921	Perfluorobutane sulfonic acid (pfbus)	[M-H]-			Organohalogen compounds	Alkyl halides	Alkyl fluorides	2.69326e+06	2.61161e+06	2.05901e+06	2.62867e+06	3.22229e+06	2.37481e+06	3.4418e+06	2.92273e+06	2.94253e+06	2.77306e+06	3.02176e+06	3.93784e+06	3.09153e+06	2.93077e+06	3.11998e+06
M748T87	747.519	87.0193	Pg 34:1	[M-H]-			Lipids and lipid-like molecules	Glycerophospholipids	Glycerophosphoglycerols	9.9324e+07	6.51045e+07	4.03598e+07	4.47199e+07	7.33591e+07	4.19141e+07	4.73244e+07	5.55818e+07	9.84852e+07	8.13258e+07	1.20715e+08	1.13141e+08	6.89655e+07	7.30526e+07	7.30564e+07
M746T66	745.503	66.2821	Pg 34:2	[M-H]-			Lipids and lipid-like molecules	Glycerophospholipids	Glycerophosphoglycerols	4.29011e+07	5.74092e+07	4.17968e+07	3.32826e+07	8.95789e+07	7.45967e+07	6.42737e+07	4.60662e+07	3.0494e+07	2.97391e+07	5.98156e+07	3.78148e+07	4.60478e+07	4.50809e+07	4.60502e+07
M774T222	773.529	222.13	Pg 36:2	[M-H]-			Lipids and lipid-like molecules	Glycerophospholipids	Glycerophosphoglycerols	9.89744e+06	1.99807e+07	1.0945e+07	4.72482e+06	8.59995e+06	5.55458e+06	9.65927e+06	9.28086e+06	6.84028e+06	5.79297e+06	7.22638e+06	9.30105e+06	9.0678e+06	8.5826e+06	9.03496e+06
M772T66	771.519	65.9674	Pg 36:3	[M-H]-			Lipids and lipid-like molecules	Glycerophospholipids	Glycerophosphoglycerols	1.15651e+08	1.17026e+08	9.65893e+07	6.96777e+07	8.33806e+07	6.82691e+07	3.53996e+08	2.85668e+08	5.97192e+07	8.64714e+07	5.33611e+07	9.17893e+07	1.13099e+08	1.105e+08	1.13113e+08
M796T66	795.521	66.2821	Pg 38:5	[M-H]-						1.0775e+07	1.3664e+07	3.66422e+06	3.53434e+06	9.89295e+06	9.85405e+06	1.87023e+07	3.67305e+07	6.60348e+06	9.96478e+06	1.09808e+07	1.27555e+07	1.16531e+07	1.09025e+07	1.16532e+07
M368T380	368.158	379.82	Phe-Gly-Phe	[M-H]-			Organic acids and derivatives	Carboxylic acids and derivatives	Amino acids, peptides, and analogues	308639	481685	403960	73533.2	624305	343700	596967	4.84826e+06	458286	100511	343700	217119	403889	403459	459338
M93T404	93.0451	404.414	Phenol	[M-H]-	HMDB0000228	C00146	Benzenoids	Phenols	1-hydroxy-4-unsubstituted benzenoids	5.66431e+06	6.19311e+06	5.44494e+06	6.64236e+06	166974	3.82242e+06	4.08006e+06	57647.8	1.00912e+07	9.75672e+06	3.58928e+06	6.02808e+06	3.81647e+06	3.90342e+06	2.28091e+06
M270T410_1	270.085	409.699	Phenol, 5-[(1z)-2-(3,5-dimethoxyphenyl)ethenyl]-2-methoxy-	[M-H-CH3]-						6.46578e+06	8.11215e+06	6.67895e+06	7.22845e+06	1.20963e+06	5.50902e+06	4.18721e+06	4.12762e+06	1.44382e+07	1.24222e+07	5.19218e+06	1.04295e+07	7.64626e+06	7.65229e+06	7.80145e+06
M145T382	145.061	382.101	Phenylacetyl-l-glutamine	[M-H-C8H6O]-	HMDB0006344	C04148	Organic acids and derivatives	Carboxylic acids and derivatives	Amino acids, peptides, and analogues	1.12946e+08	1.1788e+08	1.02729e+08	6.87485e+07	1.07679e+08	7.99681e+07	1.83672e+08	2.77545e+08	1.49955e+07	6.79474e+07	2.68548e+07	3.31537e+07	9.5304e+07	9.5491e+07	9.54908e+07
M165T231	165.055	231.316	Phenyllactic acid	[M-H]-	HMDB0000779	C01479	Phenylpropanoids and polyketides	Phenylpropanoic acids		2.60402e+07	2.13178e+07	1.87336e+07	2.08108e+07	2.63051e+07	2.82622e+07	5.78518e+07	9.74229e+07	1.71105e+07	2.3077e+07	3.65161e+07	1.2114e+07	2.96661e+07	2.9667e+07	2.97805e+07
M173T63	173.016	62.9031	Phenyl phosphate	[M-H]-		C10610	Organic acids and derivatives	Organic phosphoric acids and derivatives	Phosphate esters	1.84478e+06	699639	2.71062e+06	239235	2.81584e+06	940987	264623	997554	636060	2.79811e+06	4.63232e+06	353067	1.22843e+06	1.22684e+06	1.40791e+06
M167T83	167.035	82.9236	Phloretin	[M-H-C7H6O]-	HMDB0003306	C00774	Phenylpropanoids and polyketides	Linear 1,3-diarylpropanoids	Chalcones and dihydrochalcones	98661.3	161957	231016	217257	88267.8	97150.2	61974.9	1.77809e+06	1.15681e+06	448801	5.44705e+06	1.0533e+06	719989	804116	620845
M540T281	540.368	280.605	Phosphatidylcholine lyso alkyl 16:0	[M+CH3COO]-			Lipids and lipid-like molecules	Glycerophospholipids	Glycerophosphocholines	1.95992e+07	2.0007e+07	1.29299e+07	1.56132e+07	4.48876e+06	996745	3.71409e+07	1.68989e+07	4.94825e+06	5.38519e+06	2.9778e+06	1.10767e+07	1.34213e+07	1.3462e+07	1.34211e+07
M167T389	166.974	388.918	Phosphoenolpyruvate	[M-H]-	HMDB0000263	C00074	Organic acids and derivatives	Organic phosphoric acids and derivatives	Phosphate esters	2.00592e+06	4.282e+06	6.00308e+06	7.48006e+06	8.12737e+06	6.75735e+06	565354	3.12684e+06	6.56535e+06	6.42842e+06	7.21436e+06	4.14494e+06	5.65092e+06	5.65068e+06	5.42143e+06
M97T398	96.9689	398.291	Phosphoric acid	[M-H]-	HMDB0000973	C00009	Homogeneous non-metal compounds	Non-metal oxoanionic compounds	Non-metal phosphates	4.07708e+08	4.22211e+08	5.04057e+08	4.94435e+08	5.04898e+08	4.28063e+08	3.79221e+08	4.98183e+08	3.49755e+08	3.55006e+08	4.29854e+08	3.02368e+08	3.93243e+08	3.9324e+08	3.9216e+08
M283T274	283.051	273.971	Physcion	[M-H]-		C17045	Benzenoids	Anthracenes	Anthraquinones	5.03011e+06	5.52008e+06	5.56516e+06	6.32053e+06	2.8506e+06	4.81471e+06	9.14821e+06	4.56073e+06	6.54529e+06	5.44504e+06	5.46483e+06	5.39863e+06	6.34466e+06	6.34468e+06	6.30277e+06
M311T66_2	311.295	66.2741	Phytanic acid	[M-H]-	HMDB0000801	C01607	Lipids and lipid-like molecules	Prenol lipids	Diterpenoids	2.57329e+06	3.85564e+06	5.35702e+06	5.13904e+06	2.46153e+06	3.9345e+06	1.12242e+07	7.01555e+06	735220	1.02518e+06	1.14034e+06	377428	7.75761e+06	8.30117e+06	7.75403e+06
M834T265	833.519	264.591	Pi 34:2	[M-H]-			Lipids and lipid-like molecules	Glycerophospholipids	Glycerophosphoinositols	2.8605e+06	3.33155e+06	5.55744e+06	4.66277e+06	5.50342e+06	3.755e+06	4.2607e+06	2.27992e+06	2.1591e+06	2.07465e+06	3.24855e+06	2.75274e+06	3.02021e+06	2.9549e+06	3.02022e+06
M862T264	861.552	263.623	Pi 36:2	[M-H]-			Lipids and lipid-like molecules	Glycerophospholipids	Glycerophosphoinositols	2.07116e+07	1.28022e+07	1.86744e+07	2.42848e+07	1.38575e+07	1.56899e+07	1.13816e+07	5.85786e+06	7.9759e+06	1.05167e+07	9.79993e+06	1.79302e+07	1.14005e+07	1.1219e+07	1.14041e+07
M860T263	859.534	263.147	Pi 36:3	[M-H]-						6.1251e+06	6.41394e+06	8.95156e+06	9.63996e+06	7.56595e+06	1.1402e+07	9.30025e+06	6.43224e+06	7.14189e+06	8.01465e+06	9.01908e+06	1.13421e+07	6.61628e+06	6.27153e+06	6.61704e+06
M858T263	857.52	262.617	Pi 36:4	[M-H]-			Lipids and lipid-like molecules	Glycerophospholipids	Glycerophosphoinositols	1.59513e+07	1.60646e+07	1.70847e+07	1.41064e+07	1.94752e+07	1.70491e+07	2.21392e+07	2.53723e+07	2.09901e+07	1.9012e+07	2.27398e+07	2.82627e+07	1.5738e+07	1.51714e+07	1.57461e+07
M872T262	871.543	261.635	Pi 37:4	[M-H]-						4.30712e+06	2.6173e+06	3.14648e+06	2.65856e+06	2.23334e+06	2.32246e+06	4.25572e+06	4.4653e+06	1.44813e+06	2.15897e+06	1.82128e+06	2.80516e+06	2.26428e+06	2.177e+06	2.2611e+06
M886T262	885.553	261.634	Pi 38:4	[M-H]-			Lipids and lipid-like molecules	Glycerophospholipids	Glycerophosphoinositols	8.19884e+08	5.50949e+08	5.04137e+08	4.2954e+08	4.95686e+08	4.73969e+08	5.96719e+08	6.80055e+08	4.36544e+08	6.43355e+08	5.54908e+08	9.53522e+08	4.58768e+08	4.49364e+08	4.58735e+08
M884T104	883.537	104.292	Pi 38:5	[M-H]-			Lipids and lipid-like molecules	Glycerophospholipids	Glycerophosphoinositols	8.64627e+06	4.78224e+06	4.58052e+06	3.46642e+06	5.96372e+06	4.08341e+06	5.25768e+06	8.60518e+06	2.62509e+06	7.12471e+06	5.02561e+06	8.13225e+06	4.69802e+06	4.56188e+06	4.56804e+06
M195T442	194.946	441.728	Picloram	[M-H-CO2]-		C14310	Organoheterocyclic compounds	Pyridines and derivatives	Pyridinecarboxylic acids and derivatives	1.7903e+07	1.32721e+07	1.07986e+07	1.536e+07	1.24096e+07	1.005e+07	1.0618e+07	1.24449e+07	1.37167e+07	1.00857e+07	1.06664e+07	9.17157e+06	1.044e+07	1.04401e+07	9.37769e+06
M217T40	217.017	40.2518	Ponceau 6	[M-2H]2-			Benzenoids	Naphthalenes	Naphthalene sulfonic acids and derivatives	9.67741e+06	9.45643e+06	3.20792e+07	1.35362e+07	1.09368e+07	920748	5.28174e+06	1.24878e+07	1.02388e+07	258957	1.02388e+07	1.02388e+07	9.20968e+06	8.52564e+06	8.48473e+06
M463T37	463.287	37.1566	Pristimerin	[M-H]-		C08633	Lipids and lipid-like molecules	Prenol lipids	Triterpenoids	2.91105e+06	1.86376e+06	2.47515e+06	4.83633e+06	406378	1.68596e+06	9.25449e+06	8.11792e+06	1.09841e+06	2.24202e+06	1.50935e+06	1.63718e+06	5.38157e+06	5.70974e+06	5.39596e+06
M236T66_2	236.105	66.2821	Probucol	[M-H-C17H27SO]-	HMDB0015537	C07373	Benzenoids	Benzene and substituted derivatives	Phenylpropanes	8.62446e+07	1.84078e+08	6.5118e+07	8.09734e+07	8.81778e+07	1.19717e+08	1.01423e+08	8.69512e+07	1.16729e+08	6.76839e+07	8.94252e+07	1.07339e+08	8.48965e+07	8.48965e+07	8.48052e+07
M313T221	313.239	220.695	Progesterone	[M-H]-	HMDB0001830	C00410	Lipids and lipid-like molecules	Steroids and steroid derivatives	Pregnane steroids	1.39952e+06	1.60018e+06	696021	623129	302290	253680	946315	1.87453e+06	1.13249e+06	1.4068e+06	677368	3.00316e+06	1.18104e+06	1.13085e+06	1.1782e+06
M295T817	294.994	817.235	Propanoic acid, 3-[[[2-[(aminoiminomethyl)amino]-4-thiazolyl]methyl]thio]-	[M+Cl]-			Organoheterocyclic compounds	Azoles	Thiazoles	9.5128e+06	2.34169e+07	4.66805e+07	2.07137e+07	1.92617e+07	1.04529e+07	1.14282e+07	1.66834e+07	1.73328e+07	1.07763e+07	2.88689e+07	8.61764e+06	2.954e+07	3.94549e+07	3.98192e+07
M69T44	68.9945	43.69	Propiolic acid	[M-H]-	HMDB0006804	C00804	Organic acids and derivatives	Carboxylic acids and derivatives	Carboxylic acids	5.26047e+06	5.5223e+06	6.59656e+06	4.10421e+06	1.1543e+07	1.03654e+07	1.05907e+07	1.39455e+07	6.42538e+06	1.24408e+07	7.66663e+06	4.33536e+06	7.76627e+06	8.38319e+06	7.7677e+06
M73T67	73.0284	67.3144	Propionic acid	[M-H]-	HMDB0000237	C00163	Organic acids and derivatives	Carboxylic acids and derivatives	Carboxylic acids	2.36831e+08	2.55846e+08	2.87483e+08	2.34916e+08	2.50252e+08	3.11485e+08	2.50125e+08	2.44421e+08	2.78755e+08	2.63609e+08	2.5355e+08	2.48008e+08	2.57854e+08	2.93992e+08	2.58697e+08
M351T239	351.219	238.811	Prostaglandin e2	[M-H]-	HMDB0001220	C00584	Lipids and lipid-like molecules	Fatty Acyls	Eicosanoids	3.12307e+06	1.50334e+06	1.15699e+06	649569	1.58319e+06	1.10675e+06	4.34724e+06	1.36413e+07	1.70456e+06	685240	854628	1.20414e+06	2.56575e+06	2.71969e+06	2.71362e+06
M351T66	351.22	65.8825	Prostaglandin i2	[M-H]-	HMDB0001335	C01312	Lipids and lipid-like molecules	Fatty Acyls	Eicosanoids	3.42458e+06	2.06445e+06	763389	830464	2.56095e+06	364183	6.68852e+06	2.6602e+07	659594	1.3147e+06	571823	1.11903e+06	4.31457e+06	3.90285e+06	3.95118e+06
M806T262	806.496	261.718	Ps 38:6	[M-H]-			Lipids and lipid-like molecules	Glycerophospholipids	Glycerophosphoserines	36811.9	445487	323305	255751	1.98052e+06	1.73867e+06	82479.5	2.9187e+06	3.62002e+06	3.45532e+06	7.61418e+06	5.02911e+06	1.40845e+06	1.30511e+06	1.30529e+06
M837T260	836.543	259.625	Ps 40:5	[M-H]-			Lipids and lipid-like molecules	Glycerophospholipids	Glycerophosphoserines	1.18792e+07	1.27252e+07	1.45803e+07	7.10634e+06	1.94302e+07	1.41523e+07	1.22499e+07	2.01273e+07	1.59476e+07	1.56386e+07	2.5102e+07	2.97126e+07	1.47372e+07	1.48691e+07	1.47371e+07
M335T365	335.079	365.015	Psoralidin	[M-H]-	HMDB0034050	C10523	Phenylpropanoids and polyketides	Isoflavonoids	Coumestans	403056	504217	1.18086e+06	586054	1.05353e+06	701866	626097	152004	1.02564e+06	502079	1.4233e+06	269054	769201	842265	842102
M255T45	255.105	45.4158	Pterostilbene	[M-H]-	HMDB0130987	C10287	Phenylpropanoids and polyketides	Stilbenes		192306	304775	1.56214e+06	648285	2.02483e+06	1.56214e+06	1.53255e+06	448073	1.56214e+06	155793	159462	119289	3.73432e+06	3.65337e+06	3.64879e+06
M171T54	171.012	53.9058	P-toluenesulfonic acid	[M-H]-	HMDB0059933	C06677	Benzenoids	Benzene and substituted derivatives	Benzenesulfonic acids and derivatives	4.37578e+07	4.80341e+07	5.75801e+07	5.14861e+07	3.71675e+07	7.97153e+07	3.82639e+07	3.55314e+07	4.99174e+07	5.40807e+07	6.19595e+07	6.77191e+07	4.84083e+07	4.85618e+07	4.84994e+07
M166T361_2	166.062	361.235	Pyridoxal	[M-H]-	HMDB0001545	C00250	Organoheterocyclic compounds	Pyridines and derivatives	Pyridine carboxaldehydes	1.71278e+06	2.14771e+06	2.12613e+06	1.82989e+06	489432	1.266e+06	347851	193877	3.28509e+06	2.55284e+06	1.56258e+06	1.92181e+06	1.63309e+06	1.63308e+06	1.57596e+06
M228T50	227.997	49.9029	Pyridoxal phosphate	[M-H-H2O]-	HMDB0001491	C00018	Organoheterocyclic compounds	Pyridines and derivatives	Pyridine carboxaldehydes	4.60878e+07	2.7998e+07	4.43427e+07	4.84653e+07	1.22504e+07	1.3307e+07	4.68918e+07	7.55265e+07	6.26072e+06	7.8859e+06	2.84187e+07	5.67092e+06	2.91744e+07	2.94138e+07	2.93194e+07
M230T239	230.025	238.851	Pyridoxamine 5-phosphate	[M-H-NH3]-	HMDB0001555	C00647	Organoheterocyclic compounds	Pyridines and derivatives	Pyridoxamines	4.02632e+06	1.33902e+07	1.27888e+07	1.12947e+07	1.21572e+07	2.39812e+07	8.12588e+06	3.28956e+06	2.27398e+07	1.08528e+07	8.44422e+06	1.18306e+07	8.0563e+06	8.88492e+06	8.14713e+06
M168T419	168.043	419.173	Pyridoxine	[M-H]-	HMDB0000239	C00314	Organoheterocyclic compounds	Pyridines and derivatives	Pyridoxines	3.29271e+06	2.55129e+06	1.57644e+06	3.24474e+06	1.85525e+06	968768	1.54047e+07	1.08969e+07	2.46617e+06	3.07016e+06	3.40848e+06	2.29422e+06	3.96064e+06	4.04498e+06	3.96298e+06
M109T35	109.028	34.7257	Pyrocatechol	[M-H]-	HMDB0000957	C00090	Benzenoids	Phenols	Benzenediols	2.00139e+06	1.95128e+06	3.38896e+06	296575	997270	2.76536e+06	5.063e+06	1.89861e+07	1.51676e+06	94798.3	58015.5	81554.6	1.56803e+06	1.47533e+06	1.56782e+06
M110T312	110.035	312.084	Pyrrole-2-carboxylic acid	[M-H]-	HMDB0004230	C05942	Organoheterocyclic compounds	Pyrroles	Pyrrole carboxylic acids and derivatives	1.65427e+06	1.56131e+06	1.46735e+06	1.5104e+06	2.15674e+06	2.64953e+06	2.90742e+06	2.12193e+06	1.42724e+06	1.42909e+06	1.61796e+06	1.86915e+06	1.80477e+06	1.80653e+06	1.85185e+06
M71T362	71.0127	361.973	Pyruvaldehyde	[M-H]-	HMDB0001167	C00546	Organic oxygen compounds	Organooxygen compounds	Carbonyl compounds	1.31261e+07	1.59438e+07	2.59209e+07	1.98537e+07	2.59211e+07	1.85537e+07	1.07119e+07	6.6201e+06	2.37486e+07	1.6305e+07	2.92675e+07	1.27175e+07	1.92673e+07	1.94942e+07	1.92371e+07
M87T227_3	87.0077	226.573	Pyruvate	[M-H]-	HMDB0000243	C00022	Organic acids and derivatives	Keto acids and derivatives	Alpha-keto acids and derivatives	3.92022e+09	4.48998e+09	8.05358e+09	8.94087e+09	1.0263e+10	6.2344e+09	4.22186e+09	1.19986e+09	5.68101e+09	4.54373e+09	8.22788e+09	3.87471e+09	6.95546e+09	6.95521e+09	7.00514e+09
M179T963	178.983	962.697	Quercetin	[M-H-C7H6O2]-	HMDB0005794	C00389	Phenylpropanoids and polyketides	Flavonoids	Flavones	1.34589e+06	2.28595e+06	2.99754e+06	3.03442e+06	2.73415e+06	2.835e+06	2.28277e+06	2.80218e+06	3.02706e+06	2.67296e+06	2.09298e+06	2.78897e+06	3.11081e+06	3.08088e+06	3.08084e+06
M166T220	166.013	219.704	Quinolinate	[M-H]-	HMDB0000232	C03722	Organoheterocyclic compounds	Pyridines and derivatives	Pyridinecarboxylic acids and derivatives	3.3655e+06	3.60136e+06	1.91944e+06	7.28774e+06	1.25097e+06	7.67152e+06	2.35092e+06	4.57273e+06	1.87575e+06	2.43535e+06	1.55256e+06	3.44071e+06	5.08068e+06	3.47825e+06	4.02432e+06
M299T109	299.259	109.195	(r)-2-hydroxystearic acid	[M-H]-			Lipids and lipid-like molecules	Fatty Acyls	Fatty acids and conjugates	3.31281e+06	3.55287e+06	1.62954e+06	1.61147e+06	1.1143e+06	1.20003e+06	3.9795e+06	3.13337e+06	8.68995e+06	8.42831e+06	4.39271e+06	1.0659e+07	6.02419e+06	5.96953e+06	5.93865e+06
M353T37	353.2	36.8504	Rauwolscine	[M-H]-						9.55054e+06	1.58948e+07	1.08702e+07	4.79493e+07	1.2309e+07	1.46481e+07	2.41556e+07	1.19153e+07	1.36606e+07	9.95458e+06	8.09849e+06	1.12668e+07	2.53374e+07	2.5887e+07	2.53664e+07
M227T47	227.073	47.2755	Resveratrol	[M-H]-	HMDB0000253	C03582	Phenylpropanoids and polyketides	Stilbenes		197533	108597	881344	133765	862117	881344	82168.4	97135.6	881344	766629	881344	78336.6	1.62269e+06	1.78601e+06	1.43947e+06
M151T283	151.062	283.188	Ribitol	(M-H)-	HMDB0000508	C00474	Organic oxygen compounds	Organooxygen compounds	Carbohydrates and carbohydrate conjugates	360167	482616	401245	532346	384085	459833	439561	495495	698798	366523	315398	452385	636281	739274	640268
M297T66	297.244	66.2821	Ricinoleic acid	[M-H]-	HMDB0034297	C08365	Lipids and lipid-like molecules	Fatty Acyls	Fatty acids and conjugates	8.80326e+06	1.28072e+07	7.77388e+06	1.0452e+07	8.25575e+06	9.19639e+06	2.85928e+07	2.96716e+07	3.97497e+07	4.61321e+07	2.78505e+07	5.71693e+07	2.74732e+07	2.7474e+07	2.77087e+07
M129T261	129.019	260.657	(S)-2-Hydroxyglutarate	(M-H2O-H)-	HMDB0000694	C03196	Organic acids and derivatives	Hydroxy acids and derivatives	Short-chain hydroxy acids and derivatives	1.94781e+06	2.77744e+06	3.7166e+06	2.54856e+06	3.5499e+06	3.09168e+06	4.15637e+06	1.77025e+06	3.42529e+06	2.98866e+06	5.21525e+06	2.47679e+06	2.709e+06	2.83673e+06	2.83688e+06
M383T380	383.115	380.497	S-adenosyl-l-homocysteine	[M-H]-	HMDB0000939	C00021	Nucleosides, nucleotides, and analogues	5'-deoxyribonucleosides	5'-deoxy-5'-thionucleosides	3.48733e+06	3.87202e+06	2.57814e+06	2.35165e+06	2.30004e+06	1.89797e+06	3.441e+06	4.8761e+06	1.06719e+06	2.1275e+06	1.90233e+06	1.75752e+06	2.64066e+06	2.6404e+06	2.57183e+06
M137T59_1	137.024	58.7263	Salicylic acid	[M-H]-	HMDB0001895	C00805	Benzenoids	Benzene and substituted derivatives	Benzoic acids and derivatives	9.25888e+06	9.20443e+06	1.66551e+07	1.04275e+07	3.2687e+07	2.97272e+07	2.4982e+07	3.487e+07	1.07091e+07	1.22954e+07	1.78935e+07	8.39961e+06	1.87417e+07	1.8744e+07	1.76315e+07
M88T377_4	88.0393	376.782	Sarcosine	[M-H]-	HMDB0000271	C00213	Organic acids and derivatives	Carboxylic acids and derivatives	Amino acids, peptides, and analogues	1.25288e+09	1.2584e+09	1.34497e+09	1.26811e+09	1.48124e+09	1.24573e+09	1.02939e+09	1.16528e+09	1.03168e+09	1.11621e+09	1.36332e+09	8.95011e+08	1.19646e+09	1.1965e+09	1.19124e+09
M147T221	147.011	220.754	S-citramalic acid	[M-H]-		C02614	Lipids and lipid-like molecules	Fatty Acyls	Fatty acids and conjugates	3.74737e+06	4.14177e+06	3.93186e+06	3.0714e+06	4.40144e+06	2.03286e+06	9.56055e+06	1.1886e+07	2.95242e+06	5.11117e+06	989715	1.77099e+06	4.27186e+06	3.88309e+06	3.88356e+06
M196T136	196.01	135.692	Seleno-l-methionine	[M-H]-	HMDB0003966	C05335	Organic acids and derivatives	Carboxylic acids and derivatives	Amino acids, peptides, and analogues	772432	1.24034e+06	305621	513563	226785	736400	2.49993e+06	6.57755e+06	457092	627030	579262	469473	981570	1.02151e+06	1.02116e+06
M236T43	236.096	42.5992	Sepiapterin	[M-H]-	HMDB0000238	C00835	Organoheterocyclic compounds	Pteridines and derivatives	Pterins and derivatives	1.09721e+07	9.04685e+06	7.08302e+06	3.99969e+06	7.53807e+06	1.95472e+07	4.48372e+06	5.41503e+06	5.36514e+06	5.81281e+06	8.81916e+06	6.18387e+06	8.70648e+06	8.55019e+06	8.65876e+06
M219T378	219.062	377.916	Ser-Asp	[M-H]-			Organic acids and derivatives	Carboxylic acids and derivatives	Amino acids, peptides, and analogues	2.92343e+06	2.63415e+06	2.92689e+06	1.88177e+06	1.99866e+06	2.74364e+06	3.67255e+06	6.35657e+06	2.14199e+06	2.24491e+06	2.35046e+06	2.25057e+06	2.91167e+06	3.02414e+06	2.91259e+06
M233T376	233.078	376.044	Ser-Glu	[M-H]-			Organic acids and derivatives	Carboxylic acids and derivatives	Amino acids, peptides, and analogues	3.5553e+06	3.76789e+06	3.396e+06	2.0077e+06	2.94364e+06	2.67239e+06	2.60447e+06	2.6729e+06	1.12938e+06	1.48221e+06	1.90295e+06	2.17376e+06	2.41385e+06	2.38268e+06	2.38303e+06
M191T362	191.069	362.155	Ser-Ser	[M-H]-			Organic acids and derivatives	Carboxylic acids and derivatives	Amino acids, peptides, and analogues	1.52167e+06	1.1049e+06	1.34461e+06	620392	1.44144e+07	3.98659e+06	1.0039e+06	1.03412e+06	540933	543478	888206	592580	1.5289e+06	1.51814e+06	1.22668e+06
M205T358_2	205.083	357.924	Ser-Thr	[M-H]-			Organic acids and derivatives	Carboxylic acids and derivatives	Amino acids, peptides, and analogues	1.26913e+06	1.27447e+06	1.4004e+06	807065	1.00735e+06	806924	1.96624e+06	1.06094e+06	636338	289190	708355	421126	1.04994e+06	1.06319e+06	1.04979e+06
M182T112	182.118	112.029	Simazine hydroxy	[M-H]-			Organoheterocyclic compounds	Triazines	Aminotriazines	3.30626e+06	1.6649e+06	4.20182e+06	670797	1.25582e+06	2.62827e+06	3.61558e+06	4.26192e+06	6.93973e+06	5.10589e+06	6.88562e+06	2.67128e+06	924439	959490	959616
M762T271	761.584	270.989	Sm d34:1	[M+CH3COOH-H]-			Lipids and lipid-like molecules	Sphingolipids	Phosphosphingolipids	5.58286e+07	3.35734e+07	5.30752e+07	5.24953e+07	4.49959e+07	3.87453e+07	4.23943e+07	7.01138e+07	2.26751e+07	2.56852e+07	2.98301e+07	3.01298e+07	4.26293e+07	4.26262e+07	4.28815e+07
M870T268	869.678	267.887	Sm d42:3	[M+CH3COOH-H]-			Lipids and lipid-like molecules	Sphingolipids	Phosphosphingolipids	2.52742e+06	1.89213e+06	2.41751e+06	2.54514e+06	1.99144e+06	2.04738e+06	1.68118e+06	1.7168e+06	728648	1.28473e+06	1.18888e+06	1.40606e+06	1.75537e+06	1.73315e+06	1.75509e+06
M181T220	181.001	220.028	S-methyl-3-thioacetaminophen	[M-H-CH3]-			Benzenoids	Benzene and substituted derivatives	Anilides	1.32067e+07	6.08773e+06	7.18229e+06	8.67216e+06	3.07235e+06	3.45129e+06	1.99264e+07	6.81178e+07	1.92423e+06	4.25197e+06	1.94046e+06	1.22306e+06	1.00385e+07	1.00292e+07	9.72006e+06
M214T389_2	214.048	388.964	sn-Glycerol 3-phosphoethanolamine	[M-H]-	HMDB0000114	C01233	Lipids and lipid-like molecules	Glycerophospholipids	Glycerophosphoethanolamines	9.54783e+06	6.55695e+06	5.95084e+06	4.19729e+06	5.32342e+06	2.67027e+06	7.98481e+07	6.00378e+07	2.72337e+06	2.75192e+06	3.48417e+06	3.04287e+06	1.36603e+07	1.36576e+07	1.34925e+07
M427T363	427.126	363.193	Spinosine	[M-H-C6H12O6]-		C17834	Phenylpropanoids and polyketides	Flavonoids	Flavonoid glycosides	1.24476e+06	1.60715e+06	1.62016e+06	1.68813e+06	1.93136e+06	1.14398e+06	3.20372e+06	959759	1.00219e+06	986669	1.25241e+06	451799	1.89744e+06	1.99954e+06	1.89802e+06
M117T366	117.018	365.822	Succinate	[M-H]-	HMDB0000254	C00042	Organic acids and derivatives	Carboxylic acids and derivatives	Dicarboxylic acids and derivatives	3.29729e+07	8.18536e+06	3.53911e+07	8.18888e+07	5.80906e+07	2.47364e+07	5.24217e+07	2.84851e+07	5.36078e+07	2.18688e+07	7.12328e+07	5.51571e+06	4.04295e+07	4.04364e+07	4.09562e+07
M323T357	323.081	356.575	Sucrose	[M-H-H2O]-	HMDB0000258	C00089	Organic oxygen compounds	Organooxygen compounds	Carbohydrates and carbohydrate conjugates	1.43611e+06	1.32513e+06	1.54554e+06	912475	3.00494e+06	731681	2.48416e+06	282635	1.0311e+06	909071	3.05319e+06	654346	1.11143e+06	1.20243e+06	1.17172e+06
M574T48	574.449	48.1726	Sulfobacin b	[M-H]-			Lipids and lipid-like molecules	Fatty Acyls	Fatty amides	357557	478577	782503	513101	421066	503692	1.51865e+06	689640	1.22426e+06	602814	1.58864e+06	1.73729e+06	752977	794768	795032
M239T378	238.892	378.349	Sulfuric acid	[2M-3H+2Na]-	HMDB0001448	C00059	Homogeneous non-metal compounds	Non-metal oxoanionic compounds	Non-metal sulfates	1.16163e+07	1.30011e+07	1.23937e+07	1.19887e+07	1.30232e+07	1.19411e+07	1.11844e+07	1.25108e+07	1.20701e+07	1.38397e+07	1.25269e+07	1.53332e+07	1.12699e+07	1.12747e+07	1.10017e+07
M149T57	149.009	57.4082	Tartaric acid	[M-H]-	HMDB0000956	C00898	Organic oxygen compounds	Organooxygen compounds	Carbohydrates and carbohydrate conjugates	1.44956e+06	544981	299497	2.43485e+06	2.56146e+06	1.69686e+06	536687	1.33772e+06	5.47943e+06	421936	349178	1.89484e+06	4.02363e+06	4.06375e+06	4.04366e+06
M124T353_2	124.007	353.17	Taurine	[M-H]-	HMDB0000251	C00245	Organic acids and derivatives	Organic sulfonic acids and derivatives	Organosulfonic acids and derivatives	3.86157e+07	6.32257e+07	8.0786e+07	7.97865e+07	1.28649e+08	6.13394e+07	2.58384e+08	2.76581e+08	3.58888e+07	4.35043e+07	8.65972e+07	2.4273e+07	9.46359e+07	9.39623e+07	9.39576e+07
M498T66	498.29	66.248	Taurochenodeoxycholate	[M-H]-	HMDB0000951	C05465	Lipids and lipid-like molecules	Steroids and steroid derivatives	Bile acids, alcohols and derivatives	1.81112e+07	1.1879e+07	1.1708e+07	8.3424e+06	3.1646e+07	1.44304e+07	3.16771e+07	9.48557e+07	1.17042e+07	1.13198e+07	2.69365e+07	1.0899e+07	2.16591e+07	2.00587e+07	2.0052e+07
M514T270	514.287	269.875	Taurocholate	[M-H]-	HMDB0000036	C05122	Lipids and lipid-like molecules	Steroids and steroid derivatives	Bile acids, alcohols and derivatives	1.47194e+07	2.20767e+06	470793	692099	4.66508e+06	815982	720009	3.58541e+06	168507	522004	439938	1.29274e+06	1.75085e+06	1.75022e+06	1.80174e+06
M340T283	340.131	283.233	Tepraloxydim	[M-H]-		C18540	Organic oxygen compounds	Organooxygen compounds	Carbonyl compounds	442676	24544	1.1199e+06	574319	31360.8	27100.1	696016	2.99055e+06	425290	425290	425290	425290	401433	401147	428591
M125T88	125.035	88.4246	Thymine	[M-H]-	HMDB0000262	C00178	Organoheterocyclic compounds	Diazines	Pyrimidines and pyrimidine derivatives	1.62109e+07	2.82572e+07	1.34256e+07	1.77947e+07	1.83676e+07	1.74528e+07	2.36441e+07	1.50652e+07	7.05201e+06	1.12506e+07	1.3165e+07	8.31651e+06	1.8769e+07	1.8594e+07	1.85374e+07
M311T42	311.168	41.5595	Thymol-beta-d-glucoside	[M-H]-			Lipids and lipid-like molecules	Prenol lipids	Terpene glycosides	6.86276e+07	2.01273e+08	8.96342e+07	2.00167e+08	7.8642e+07	9.71244e+07	2.39706e+08	1.55101e+08	2.46117e+08	1.76897e+08	1.23963e+08	1.53106e+08	3.68014e+08	3.6268e+08	3.65337e+08
M324T241	324.22	240.763	Tolterodine	[M-H]-	HMDB0015170	C07750	Benzenoids	Benzene and substituted derivatives	Diphenylmethanes	2.23125e+06	2.90974e+06	2.04739e+06	1.2242e+06	968798	2.21497e+06	676096	1.4972e+06	4.14032e+06	1.7222e+06	3.07951e+06	767185	725227	825566	824209
M213T106	213.186	106.432	Tridecanoic acid (Tridecylic acid)	[M-H]-	HMDB0000910	C17076	Lipids and lipid-like molecules	Fatty Acyls	Fatty acids and conjugates	3.07894e+06	2.52432e+06	2.71859e+06	2.51016e+06	1.80158e+06	2.31658e+06	2.91368e+06	2.52116e+06	2.74666e+06	2.65973e+06	3.3856e+06	2.24825e+06	2.6975e+06	2.6979e+06	2.57931e+06
M306T343	306.034	342.644	Trp-Cys	[M-H]-	HMDB0001202	C00239	Nucleosides, nucleotides, and analogues	Pyrimidine nucleotides	Pyrimidine deoxyribonucleotides	1.31577e+06	1.02357e+06	1.00029e+06	583590	617453	395064	1.28215e+06	1.73943e+06	198103	862611	318302	560015	754647	843777	844398
M291T270	291.136	270.257	Tubacin	[M-H-C26H23NO3S]-			Organoheterocyclic compounds	Azoles	Oxazoles	39643.8	288649	2.77295e+06	3.79857e+06	1.07408e+06	223231	3.00019e+06	4.95005e+06	106053	31371.1	33820.8	1.04552e+06	1.06691e+06	1.06693e+06	1.06087e+06
M565T387	565.047	387.04	Udp-galactose	[M-H]-	HMDB0000302	C00052	Nucleosides, nucleotides, and analogues	Pyrimidine nucleotides	Pyrimidine nucleotide sugars	1.45933e+06	1.10424e+06	1.03714e+06	1.65617e+06	474293	169949	3.30936e+06	8.20751e+06	701261	841283	1.77726e+06	485889	1.3785e+06	1.41288e+06	1.41697e+06
M606T380	606.075	380.438	Udp-n-acetylglucosamine	[M-H]-	HMDB0000290	C00043	Nucleosides, nucleotides, and analogues	Pyrimidine nucleotides	Pyrimidine nucleotide sugars	3.19296e+06	2.33251e+06	2.444e+06	2.72622e+06	2.10898e+06	1.99436e+06	5.88756e+06	1.60511e+07	1.03472e+06	1.59194e+06	2.45642e+06	877774	3.20714e+06	3.21579e+06	3.21578e+06
M185T108	185.154	107.542	Undecanoic acid	[M-H]-	HMDB0000947	C17715	Lipids and lipid-like molecules	Fatty Acyls	Fatty acids and conjugates	4.54266e+06	3.72047e+06	4.1839e+06	2.56127e+06	3.12209e+06	3.64229e+06	4.26066e+06	4.00284e+06	5.15171e+06	3.88531e+06	4.75102e+06	4.29218e+06	4.14896e+06	3.97498e+06	4.14858e+06
M111T223	111.019	222.728	Uracil	[M-H]-	HMDB0000300	C00106	Organoheterocyclic compounds	Diazines	Pyrimidines and pyrimidine derivatives	4.4497e+07	3.71916e+07	3.6708e+07	2.60262e+07	1.58874e+07	9.64904e+06	1.15797e+08	2.83095e+08	1.52475e+07	1.40366e+07	1.89207e+07	1.41898e+07	3.85368e+07	3.98718e+07	3.98746e+07
M158T355	158.009	355.254	Ureidosuccinic acid	[M-H-NH3]-			Organic acids and derivatives	Carboxylic acids and derivatives	Amino acids, peptides, and analogues	1.1928e+06	616359	572316	711129	489446	463476	1.67103e+06	3.51958e+06	233303	387612	381036	284438	647032	640595	647027
M167T355	167.021	355.019	Uric acid	[M-H]-	HMDB0000289	C00366	Organoheterocyclic compounds	Imidazopyrimidines	Purines and purine derivatives	8.92637e+06	4.94221e+06	9.2635e+06	9.69459e+06	3.76354e+06	3.2091e+06	1.65084e+07	3.18672e+07	2.21896e+06	2.65455e+06	3.04342e+06	1.31446e+06	7.36822e+06	6.9907e+06	6.99231e+06
M243T292	243.062	291.745	Uridine	[M-H]-	HMDB0000296	C00299	Nucleosides, nucleotides, and analogues	Pyrimidine nucleosides		4.35805e+07	3.6115e+07	4.8643e+07	3.46026e+07	3.81955e+07	3.51108e+07	4.26627e+07	7.11262e+07	3.4286e+07	1.89037e+07	2.58826e+07	2.47227e+07	3.83814e+07	3.83375e+07	3.91412e+07
M323T387	323.029	387.386	Uridine 5'-monophosphate	[M-H]-	HMDB0000288	C00105	Nucleosides, nucleotides, and analogues	Pyrimidine nucleotides	Pyrimidine ribonucleotides	3.49931e+07	4.37927e+07	5.3437e+07	3.13781e+07	4.4578e+07	4.2396e+07	5.42933e+07	5.22073e+07	2.3603e+07	2.88495e+07	4.41435e+07	2.21244e+07	3.8509e+07	3.88465e+07	3.85043e+07
M233T58	233.155	57.5996	Valerenic acid	[M-H]-		C09743	Lipids and lipid-like molecules	Prenol lipids	Sesquiterpenoids	1.93319e+06	1.4309e+06	1.12015e+06	1.5564e+06	1.03053e+06	1.05367e+06	744256	1.28394e+06	1.31083e+06	1.34113e+06	1.78269e+06	2.7893e+06	5.99045e+06	5.98956e+06	5.90368e+06
M101T111	101.06	111.319	Valeric acid	[M-H]-	HMDB0000892	C00803	Lipids and lipid-like molecules	Fatty Acyls	Fatty acids and conjugates	3.19735e+06	3.45335e+06	3.27723e+06	3.42073e+06	3.23846e+06	3.16975e+06	4.19092e+06	3.01532e+06	2.8355e+06	3.17553e+06	3.02323e+06	3.29633e+06	3.52234e+06	3.51943e+06	3.59158e+06
M229T286	229.156	285.826	Val-Leu	[M-H]-			Organic acids and derivatives	Carboxylic acids and derivatives	Amino acids, peptides, and analogues	3.36352e+06	8.72638e+06	8.44068e+06	3.78151e+06	5.13124e+06	8.20105e+06	2.47091e+06	2.1107e+06	4.13017e+06	4.41917e+06	5.12022e+06	7.23455e+06	5.41711e+06	5.29831e+06	5.31039e+06
M175T438	175.024	437.974	Vitamin c	[M-H]-	HMDB0000044	C00072	Organoheterocyclic compounds	Dihydrofurans	Furanones	565971	423292	345388	376573	474993	478634	788684	1.36792e+06	172401	155280	168214	168618	412938	379526	378365
M173T349	173.026	349.411	Xanthotoxol	[M-H-CO]-	HMDB0029457	C00841	Phenylpropanoids and polyketides	Coumarins and derivatives	Furanocoumarins	232415	536164	2.38715e+06	661283	2.93175e+06	1.67158e+06	328445	251107	2.70229e+06	1.78703e+06	4.53036e+06	471918	1.56386e+06	1.64949e+06	1.65144e+06
M445T67	445.188	67.144	(z)-2,6-dimethyl-7-(4-methyl-5-oxooxolan-2-yl)-3-[[3,4,5-trihydroxy-6-(hydroxymethyl)oxan-2-yl]oxymethyl]hept-5-enoic acid	[M-H]-						2.07713e+07	2.22873e+07	3.47834e+07	2.54683e+07	2.54217e+07	3.72859e+07	2.25965e+07	1.9858e+07	3.36443e+07	2.94356e+07	3.04799e+07	2.40488e+07	2.47476e+07	2.56417e+07	2.44505e+07
M329T104	329.249	104.394	(z)-9,12,13-trihydroxyoctadec-15-enoic acid	[M-H]-			Lipids and lipid-like molecules	Fatty Acyls	Fatty acids and conjugates	5.60502e+06	5.65387e+06	5.58011e+06	7.16422e+06	4.27739e+06	8.72106e+06	4.66545e+06	1.25143e+07	5.48768e+06	5.15635e+06	5.66784e+06	9.68545e+06	6.12615e+06	6.85133e+06	6.23622e+06
M265T36	265.148	36.4445	Zinniol	[M-H]-		C10840	Benzenoids	Benzene and substituted derivatives	Benzyl alcohols	9.27068e+08	1.63619e+08	8.56834e+07	2.91882e+08	1.53464e+08	1.8436e+08	1.83153e+08	1.01493e+08	1.3559e+08	9.29487e+07	8.26699e+07	1.42916e+08	3.15287e+08	3.22566e+08	3.22533e+08
